# Supplementary material for: Highly diastereo- and enantioselective organocatalytic addition of acetone to β-substituted α-ketoesters via dynamic kinetic resolution
Source: Royal Society of Chemistry journal article supplement (doi:10.1039/b822127h), 2009-01-01
Supplement: b822127h.pdf [file b822127h.pdf]

Supporting information

**Highly Diastereo- and Enantioselective Organocatalytic**

**Addition of acetone to  $\beta$ -substituted  $\alpha$ -ketoesters**

**via Dynamic Kinetic Resolution**

Jin Yang, Ting Wang, Zhenghua Ding, Zongxuan Shen and Yawen Zhang\*

*Key Laboratory of Organic Synthesis of Jiangsu Province, College of  
Chemistry and Chemical Engineering,  
Soochow University, Suzhou, 215123, China.*

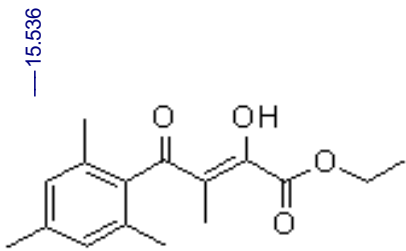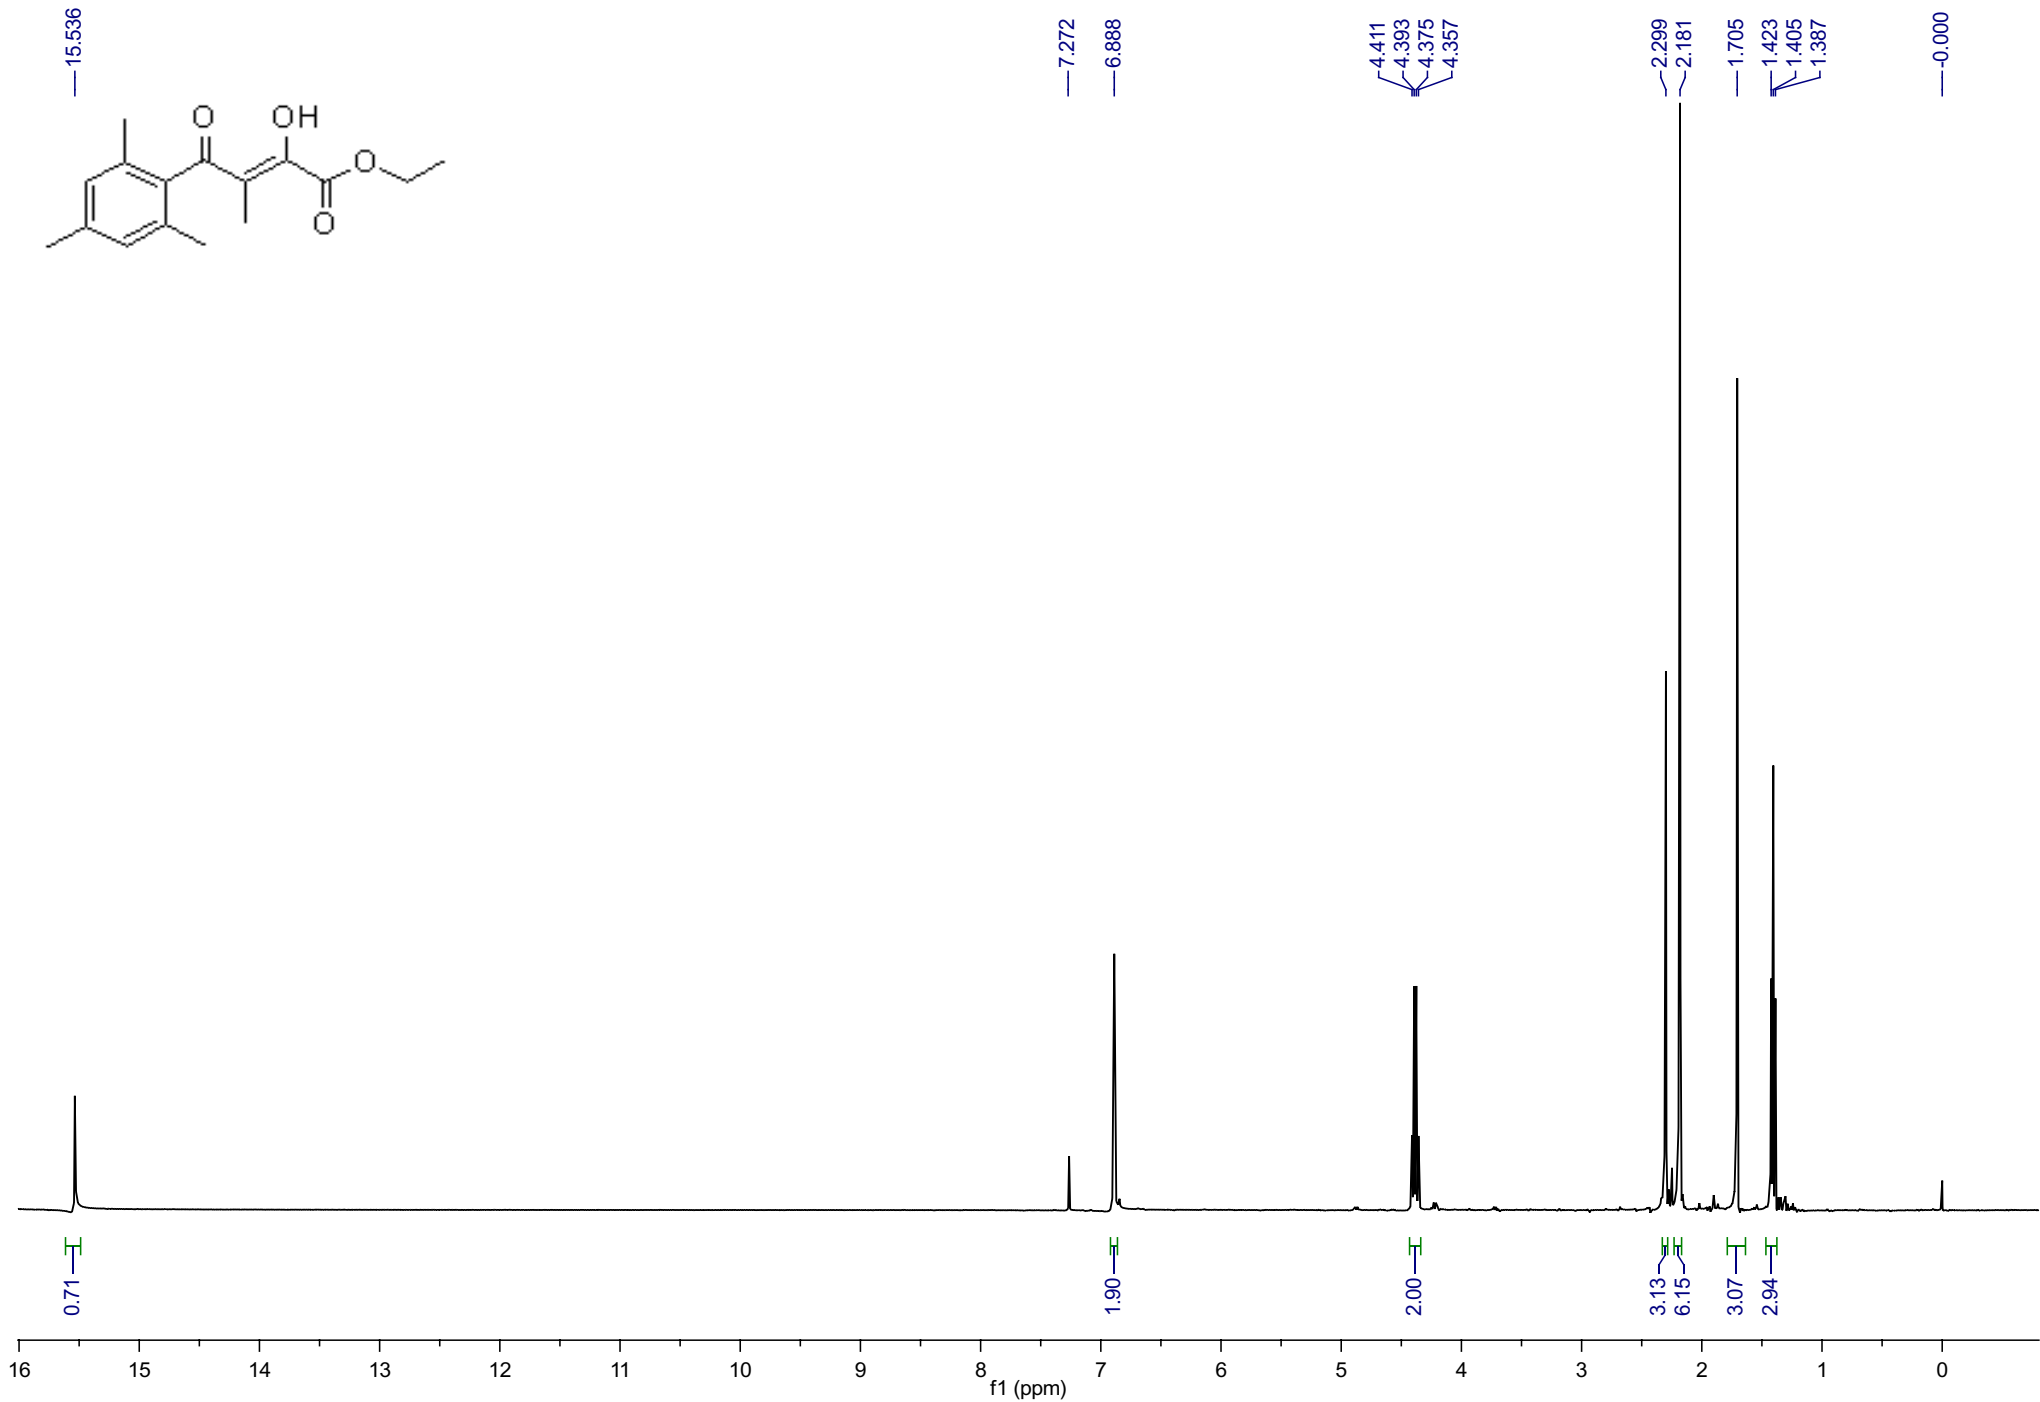

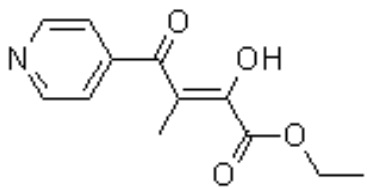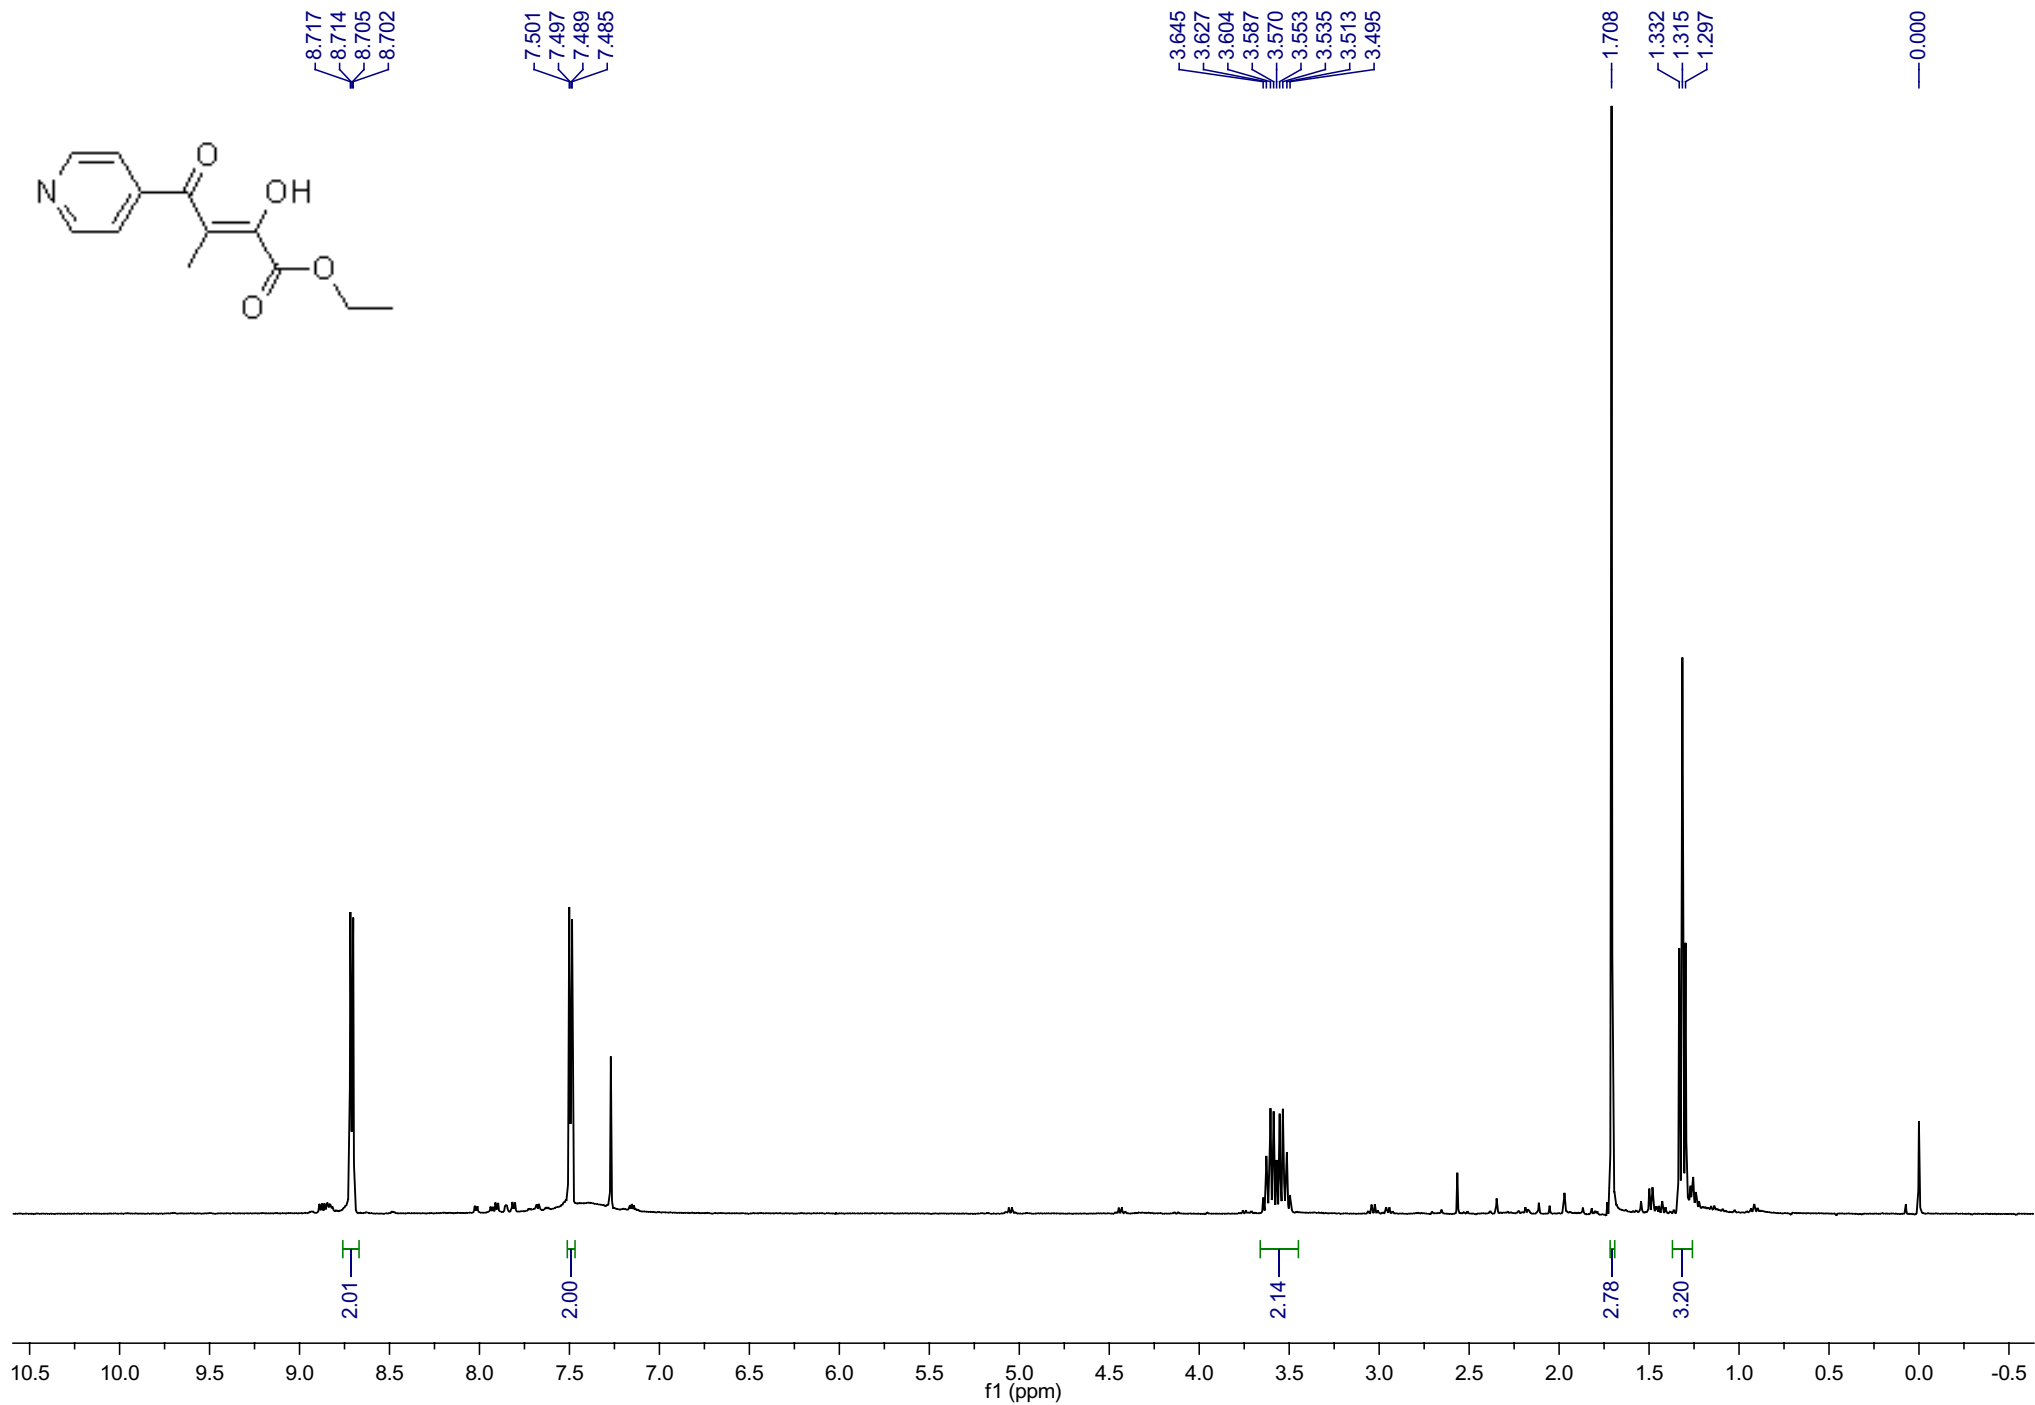

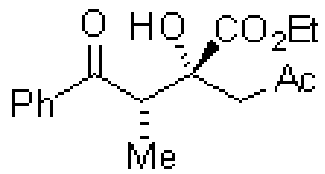

7.985  
7.966  
7.610  
7.592  
7.573  
7.500  
7.480  
7.461

4.669  
4.130  
4.112  
4.095  
4.068  
4.050  
4.032  
4.014  
3.183  
3.141  
3.037  
2.995

2.222  
1.264  
1.246  
1.192  
1.174  
1.156

0.000

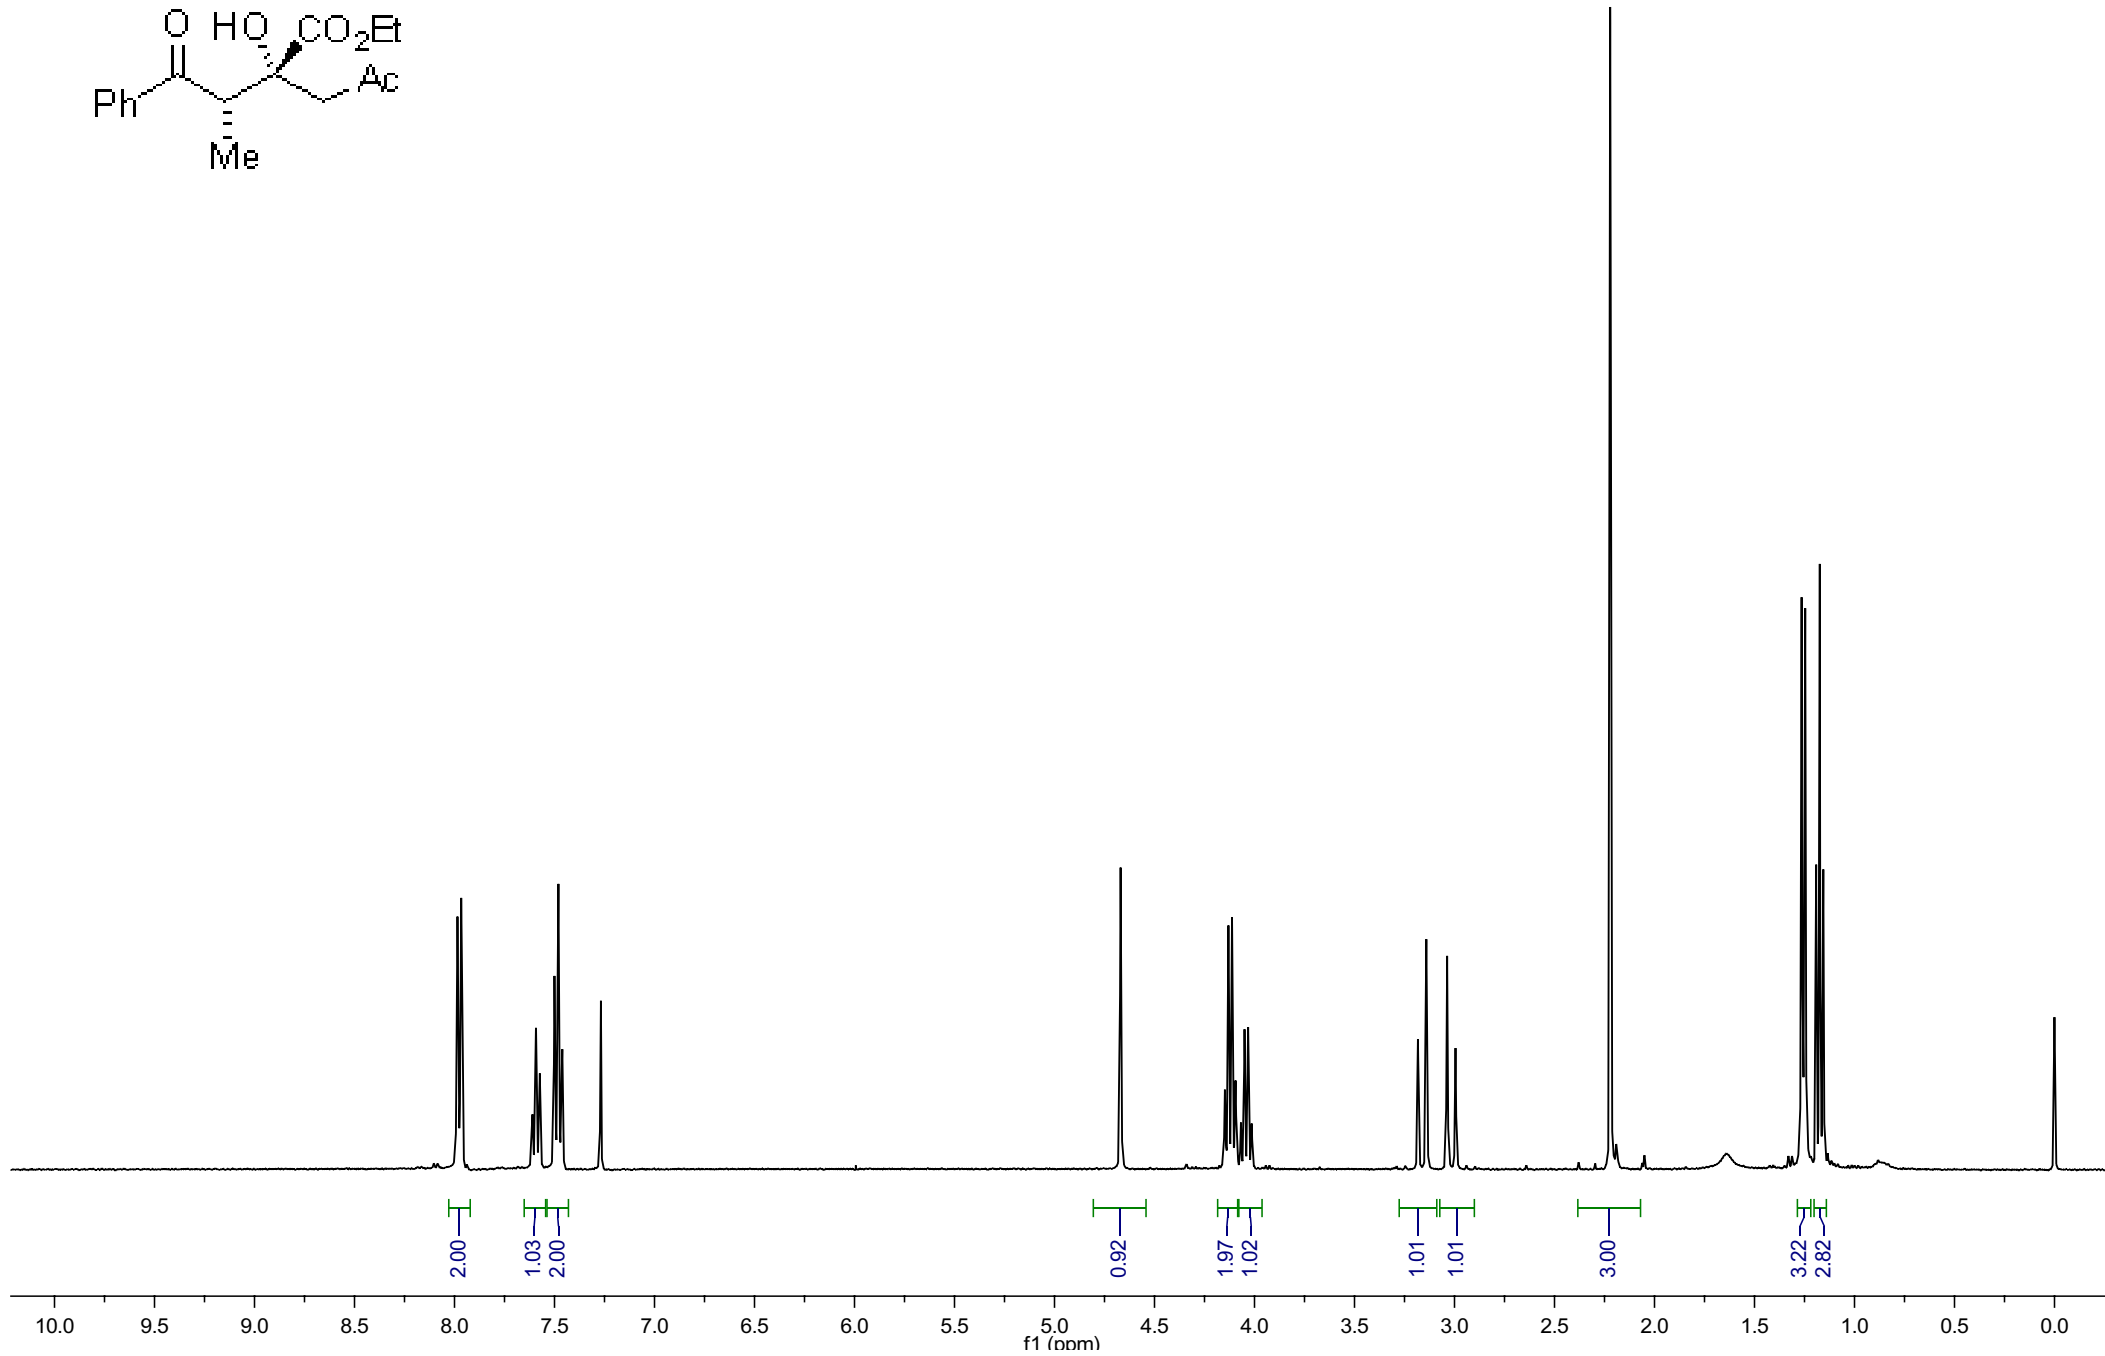

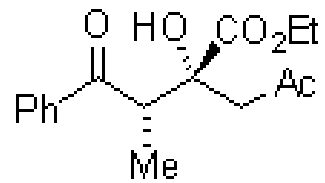

— 207.741  
— 204.638

— 174.252

— 136.997  
— 133.988  
— 129.094

— 77.865

— 62.252

— 48.150  
— 44.897

— 31.592

— 14.368  
— 12.965

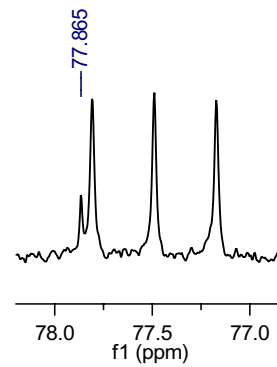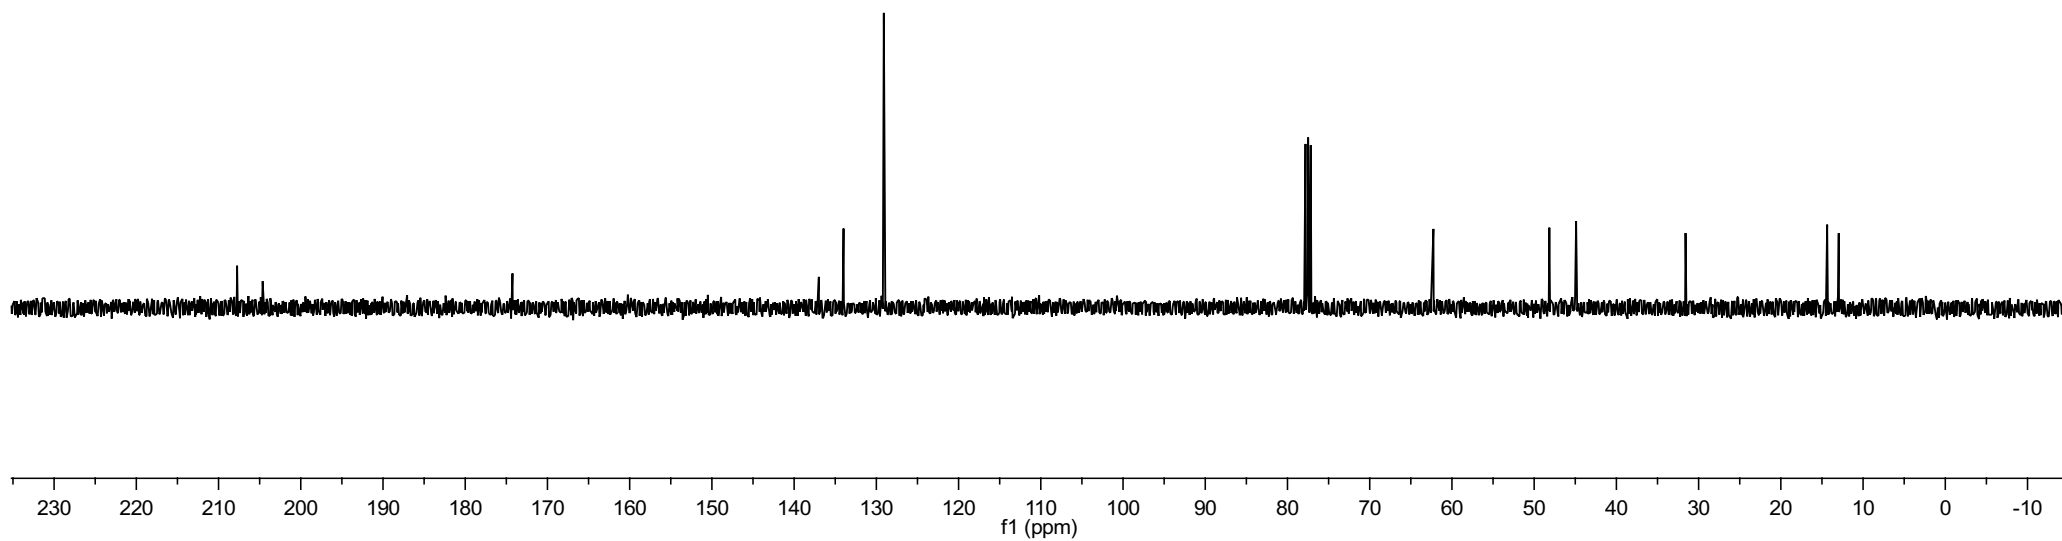

SUDA-TOFMS-EI-080703

yj-1 113 (1.883) Cm (107:113-(166:187+195:208))

TOF MS EI+  
1.94e5

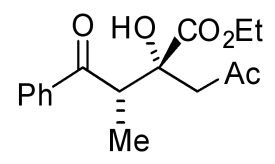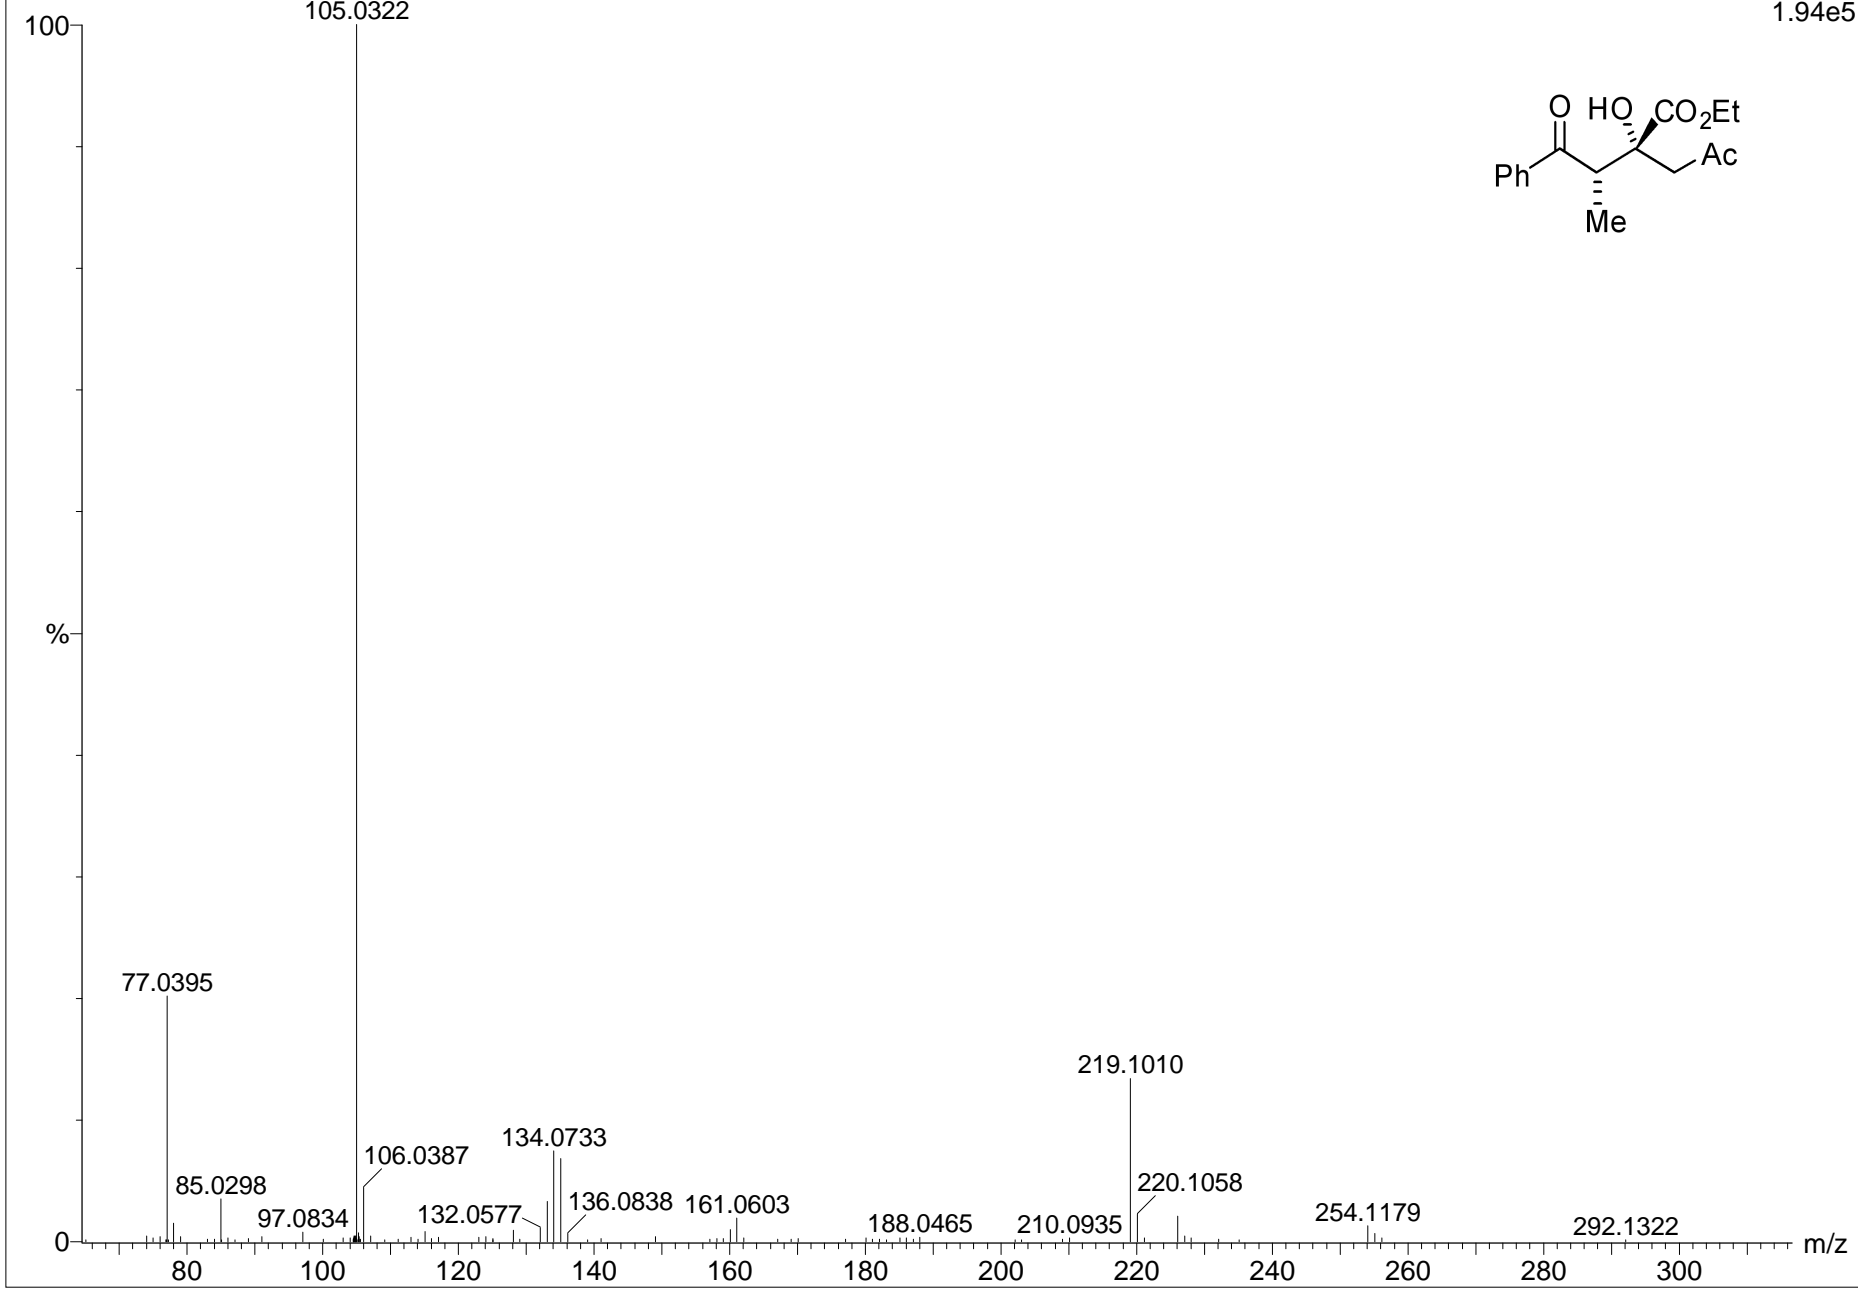

SAMPLE INFORMATION

|                   |                         |                     |              |
|-------------------|-------------------------|---------------------|--------------|
| Sample Name:      | yj-1                    | Acquired By:        | System       |
| Sample Type:      | Unknown                 | Sample Set Name:    |              |
| Vial:             | 605                     | Acq. Method Set:    | szx          |
| Injection #:      | 1                       | Processing Method:  | szx          |
| Injection Volume: | 20.00 ul                | Channel Name:       | 254.0nm      |
| Run Time:         | 25.0 Minutes            | Proc. Chnl. Descr.: | PDA 254.0 nm |
| Date Acquired:    | 2007-11-9 13:17:16 CST  |                     |              |
| Date Processed:   | 2007-11-23 15:07:20 CST |                     |              |

Auto-Scaled Chromatogram

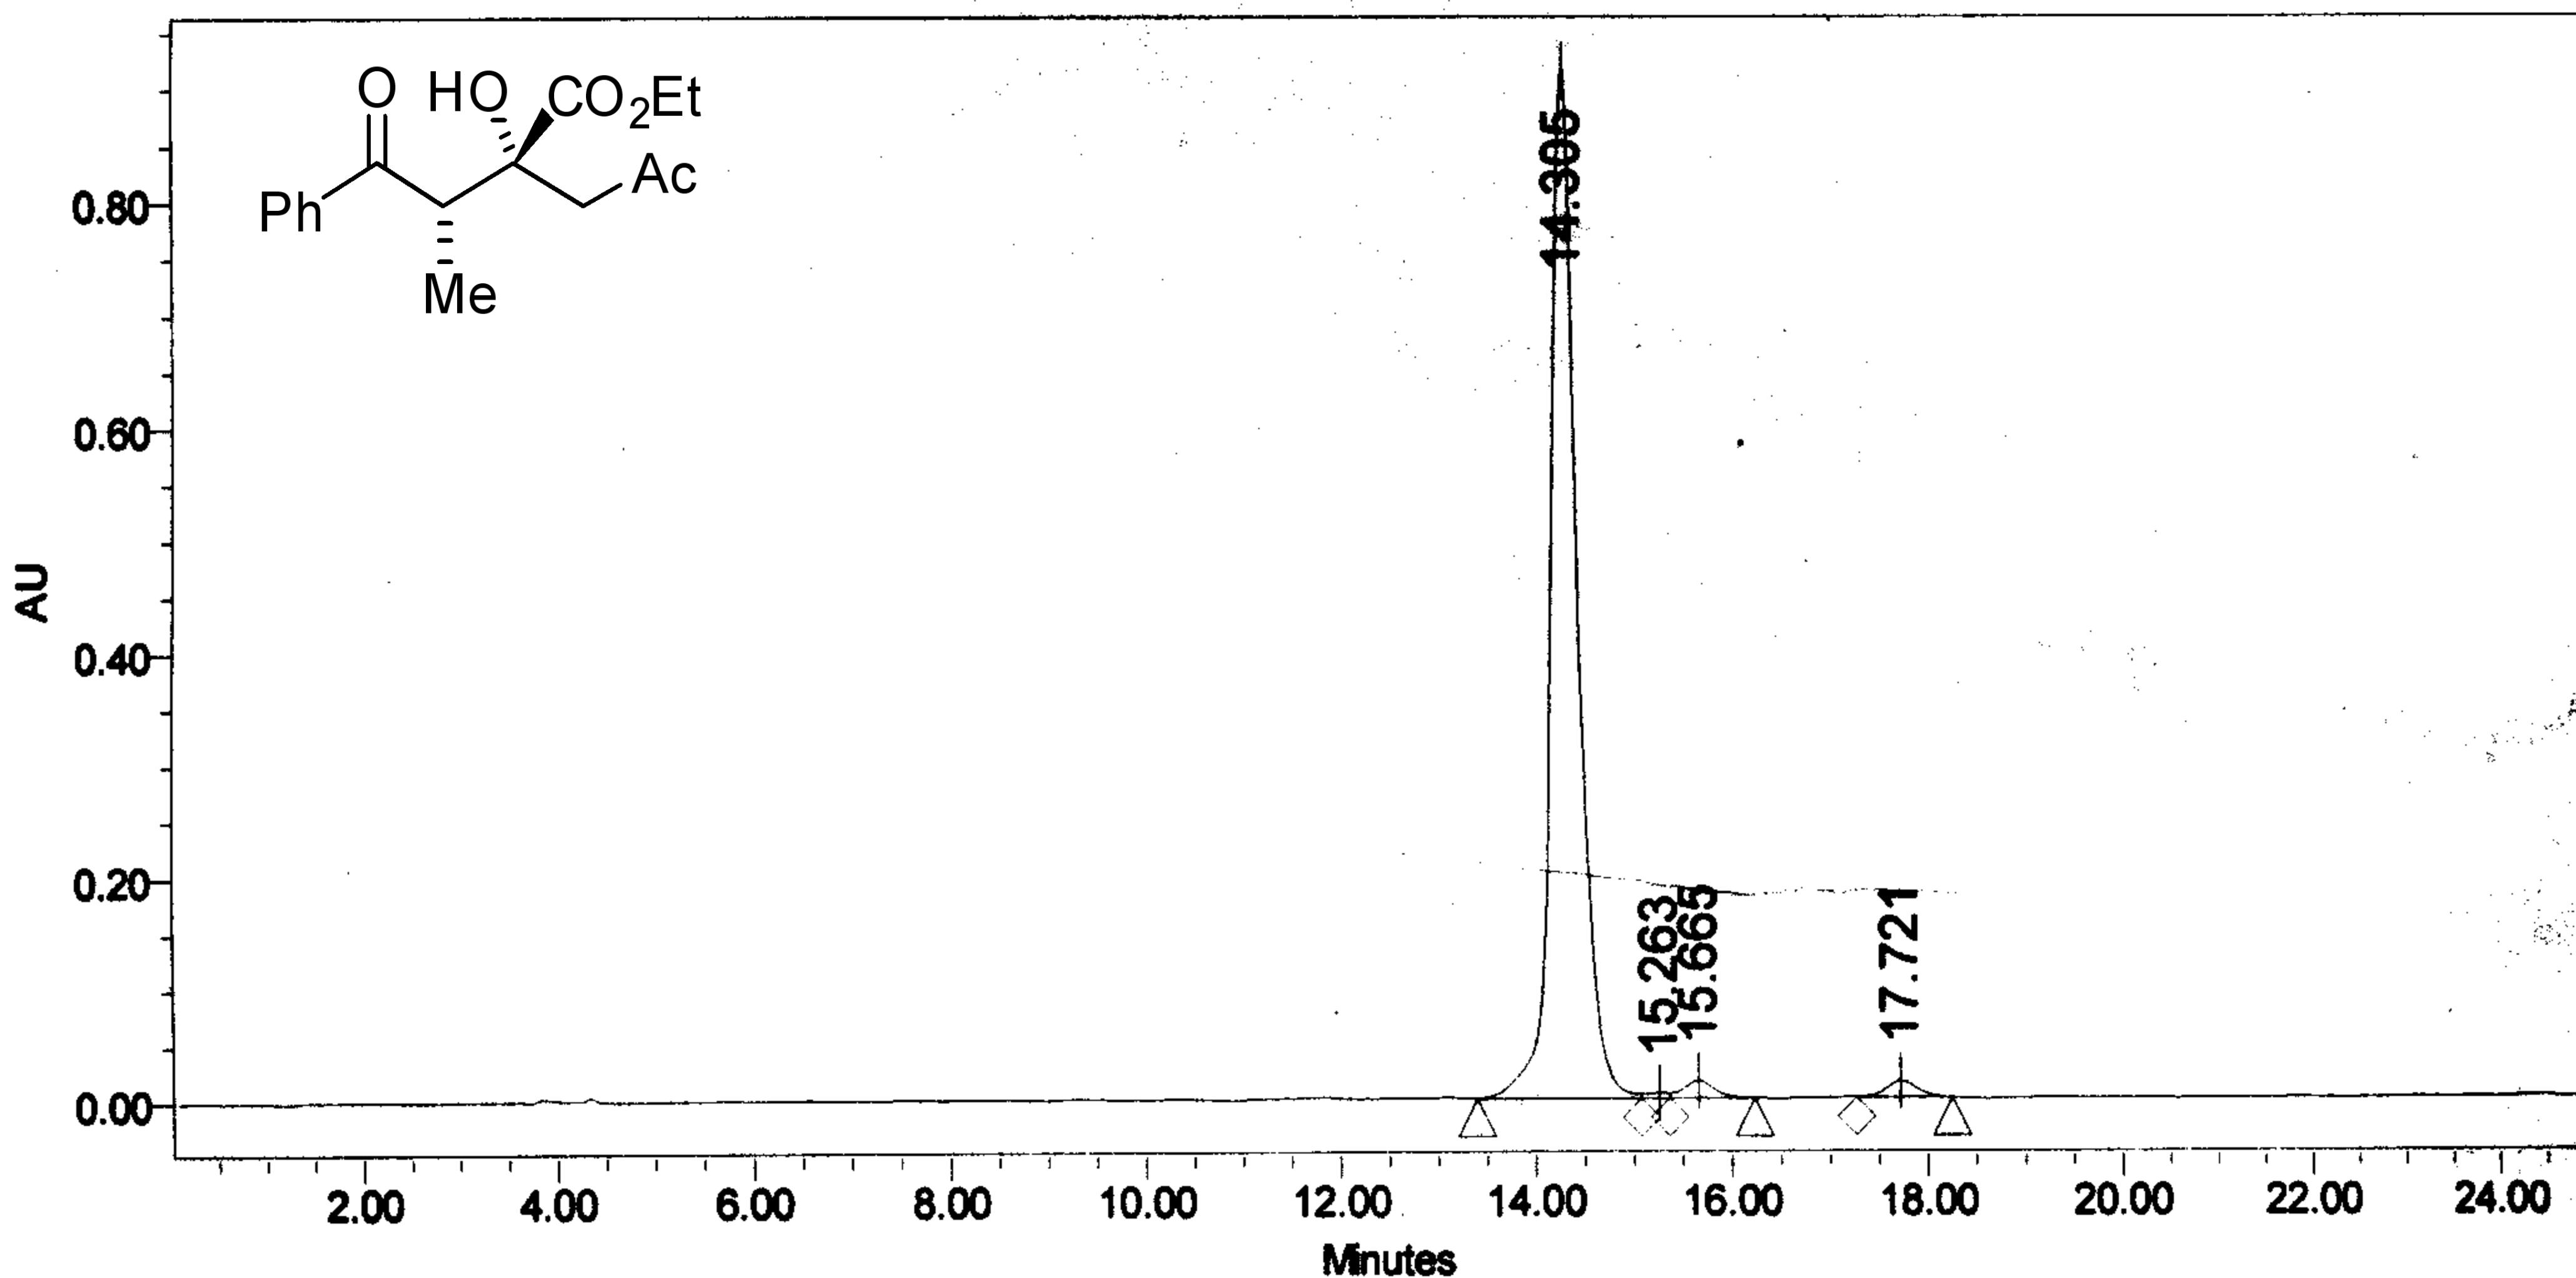

Peak Results

|   | RT     | Area     | % Area | Height | Amount |
|---|--------|----------|--------|--------|--------|
| 1 | 14.305 | 17511411 | 95.96  | 917383 |        |
| 2 | 15.263 | 72973    | 0.40   | 4712   |        |
| 3 | 15.665 | 338944   | 1.86   | 15784  |        |
| 4 | 17.721 | 325378   | 1.78   | 14622  |        |

ee 96.3%  
or 43.2%

(20 mg)

SAMPLE INFORMATION

|                   |                         |                     |              |
|-------------------|-------------------------|---------------------|--------------|
| Sample Name:      | yj-rac                  | Acquired By:        | System       |
| Sample Type:      | Unknown                 | Sample Set Name:    |              |
| Vial:             | 605                     | Acq. Method Set:    | szx          |
| Injection #:      | 1                       | Processing Method:  | szx          |
| Injection Volume: | 20.00 ul                | Channel Name:       | 254.0nm      |
| Run Time:         | 20.0 Minutes            | Proc. Chnl. Descr.: | PDA 254.0 nm |
| Date Acquired:    | 2007-11-23 13:03:10 CST |                     |              |
| Date Processed:   | 2007-11-23 13:28:37 CST |                     |              |

Auto-Scaled Chromatogram

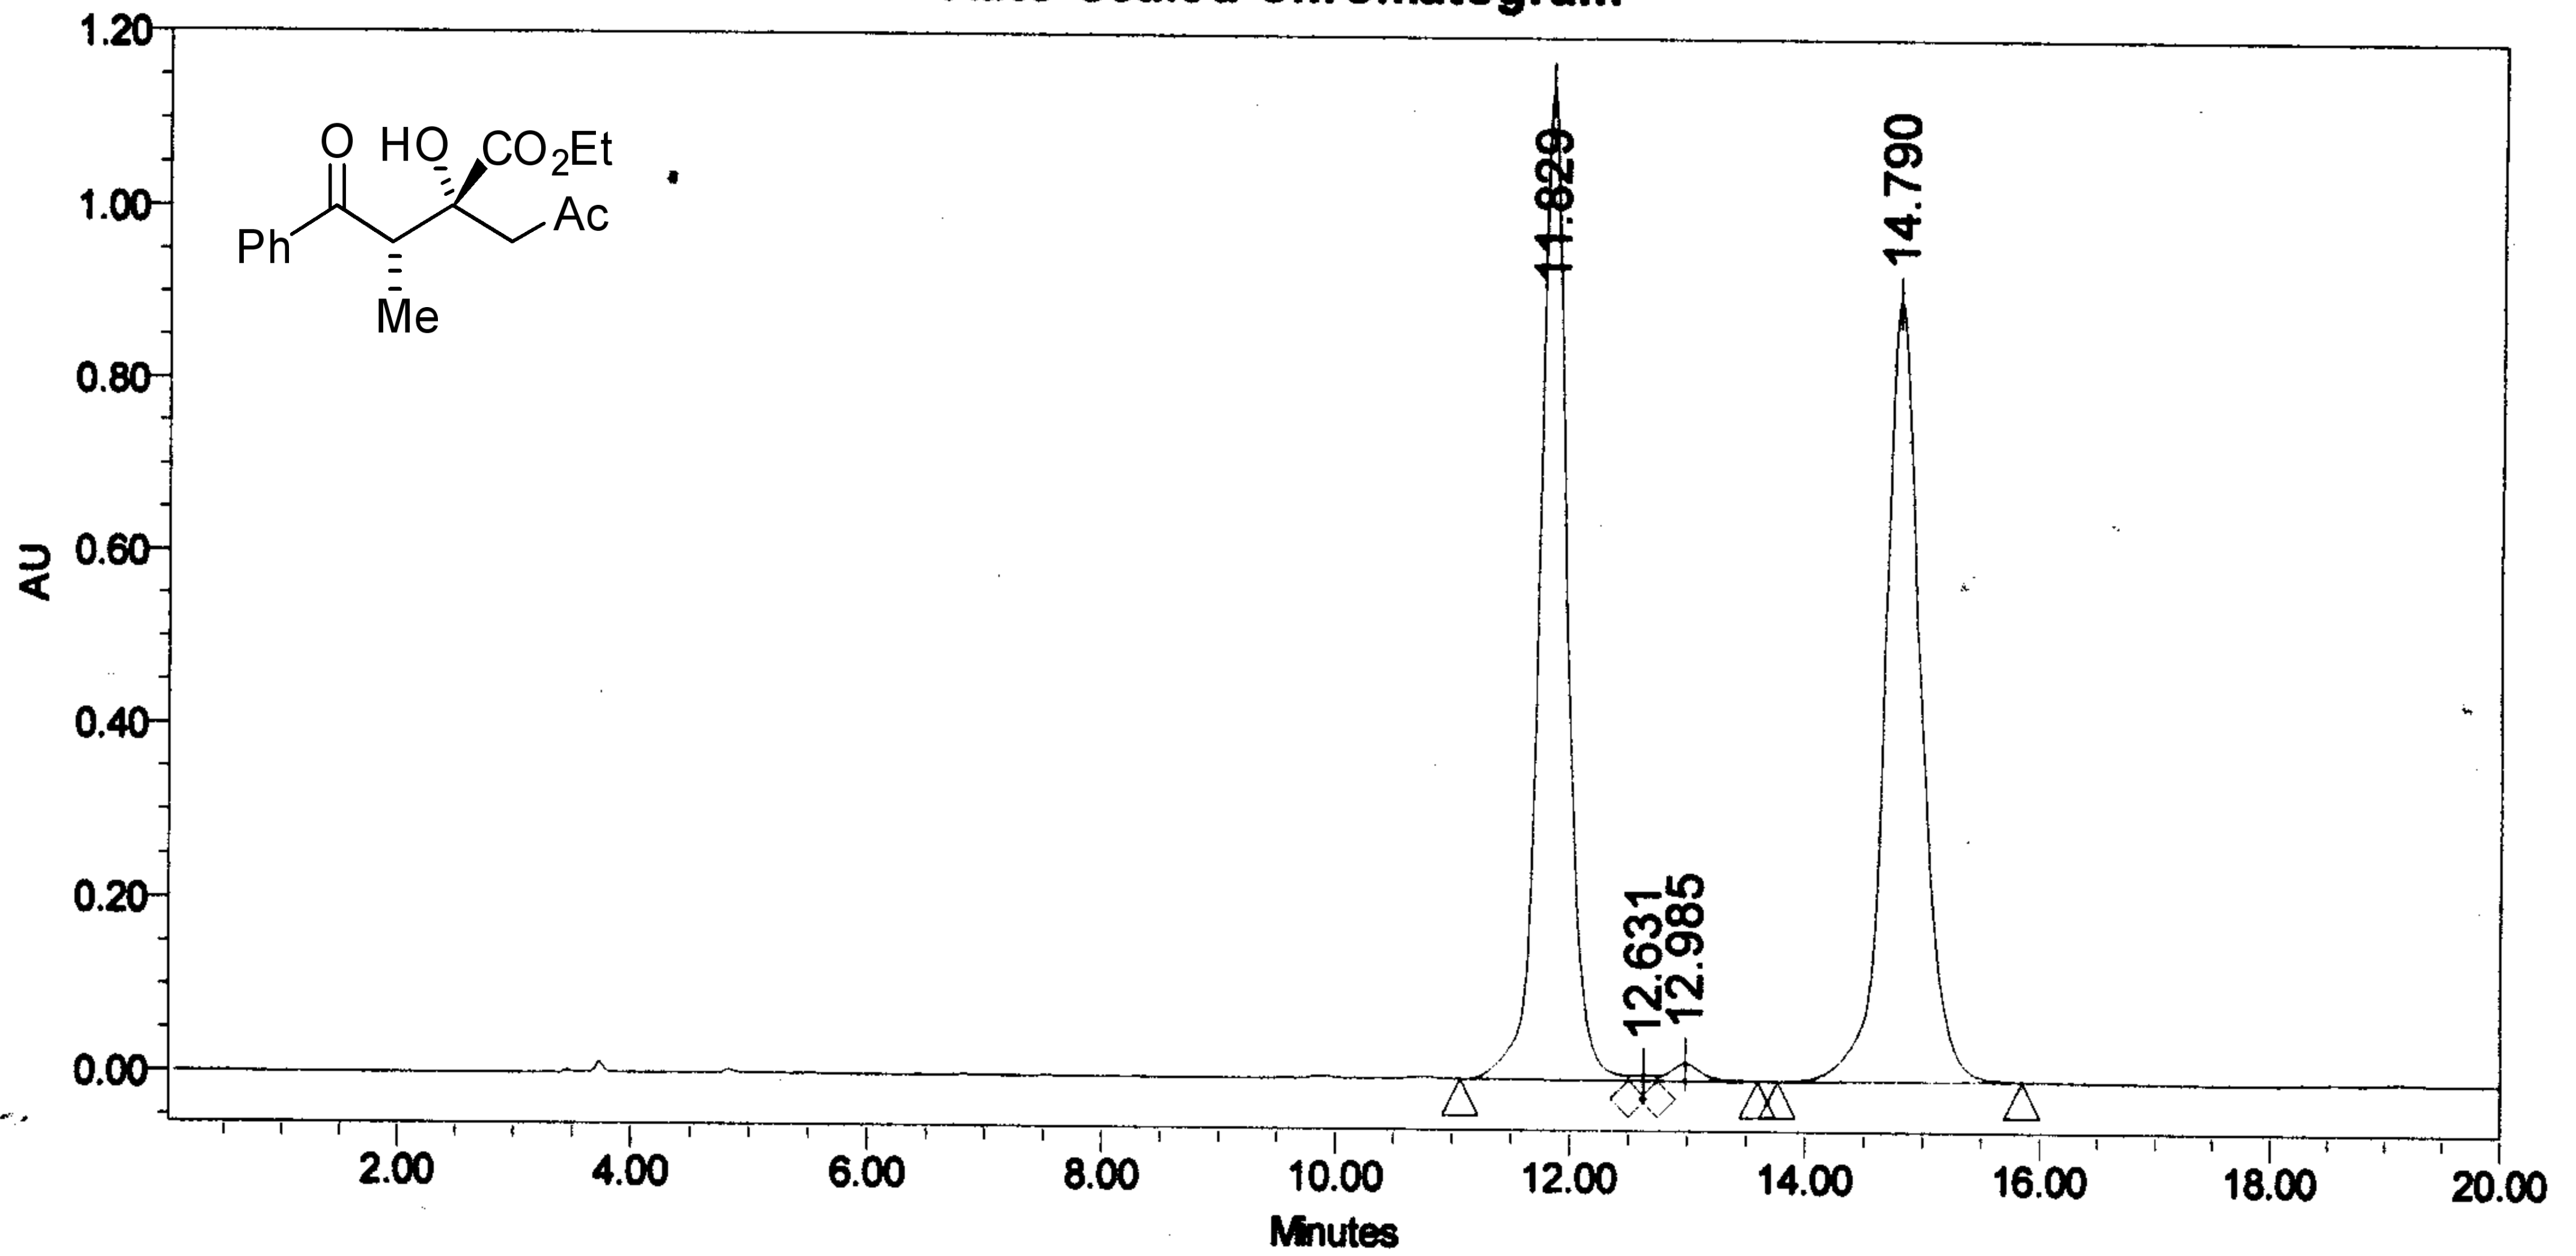

Peak Results

|   | RT     | Area     | % Area | Height  | Amount |
|---|--------|----------|--------|---------|--------|
| 1 | 11.829 | 18752305 | 48.46  | 1144828 |        |
| 2 | 12.631 | 89602    | 0.23   | 6362    |        |
| 3 | 12.985 | 361375   | 0.93   | 19897   |        |
| 4 | 14.790 | 19489723 | 50.37  | 901820  |        |



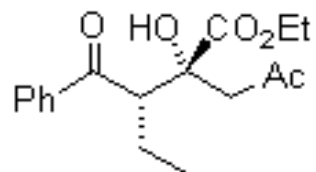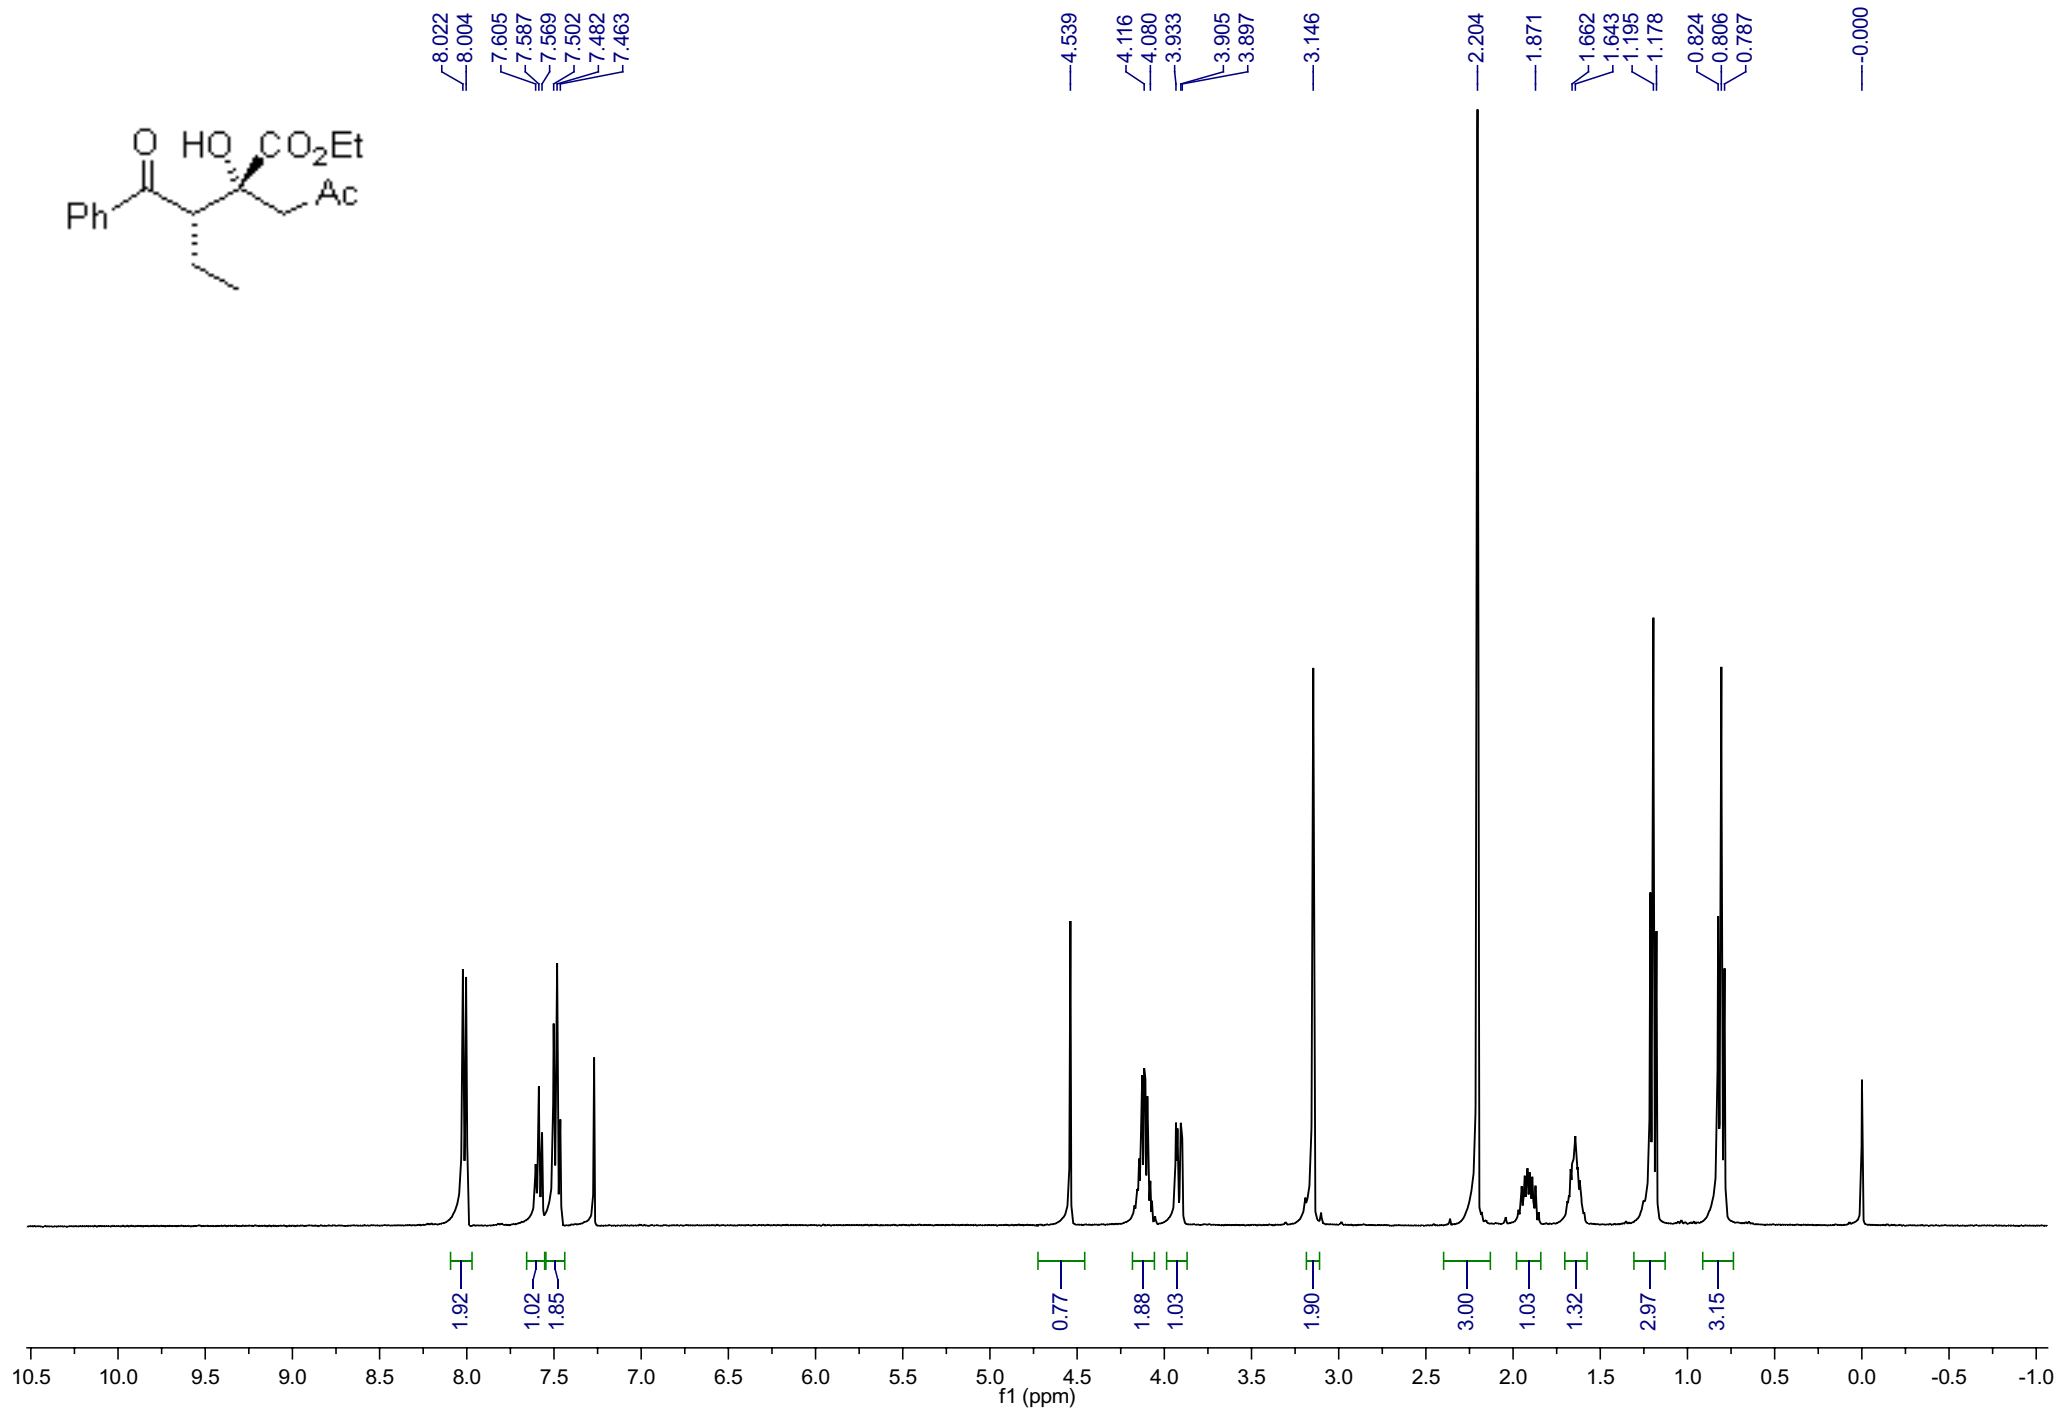

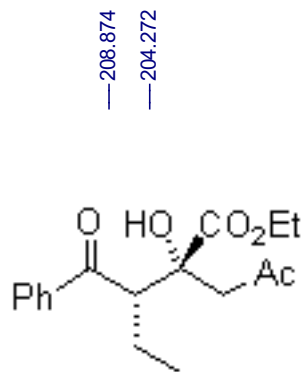

— 208.874  
— 204.272

— 174.227

— 139.298  
— 133.841  
— 129.099  
— 129.026

— 78.211

— 62.330

— 52.321

— 47.277

— 31.424

— 21.841

— 14.406  
— 12.890

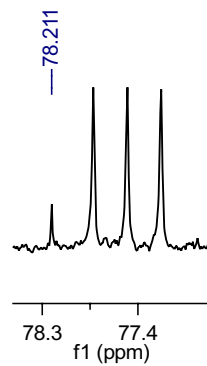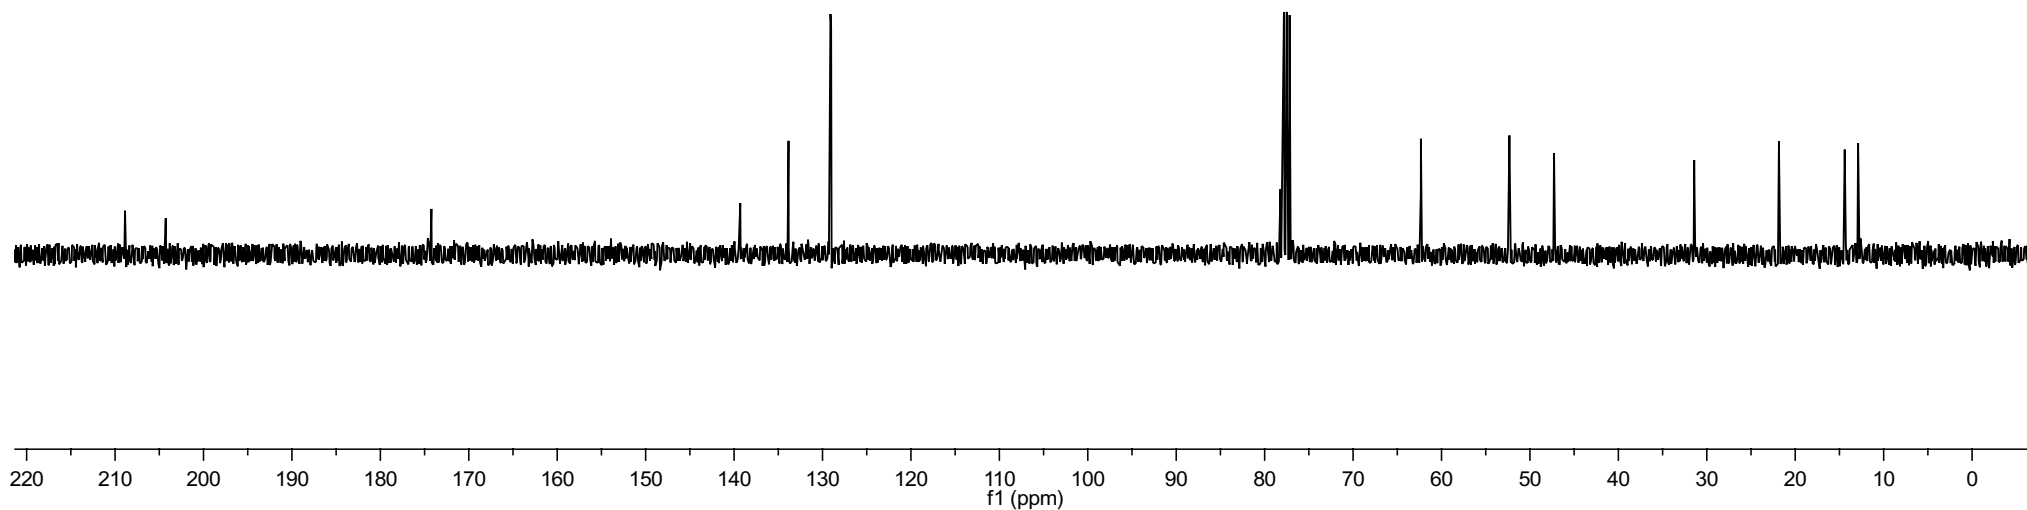

SUDA-TOFMS-EI-080704

yj-8 95 (1.582) Cm (95-(118:120+131:134))

TOF MS EI+  
3.60e4

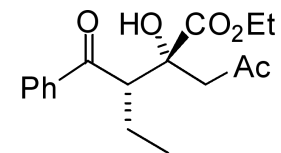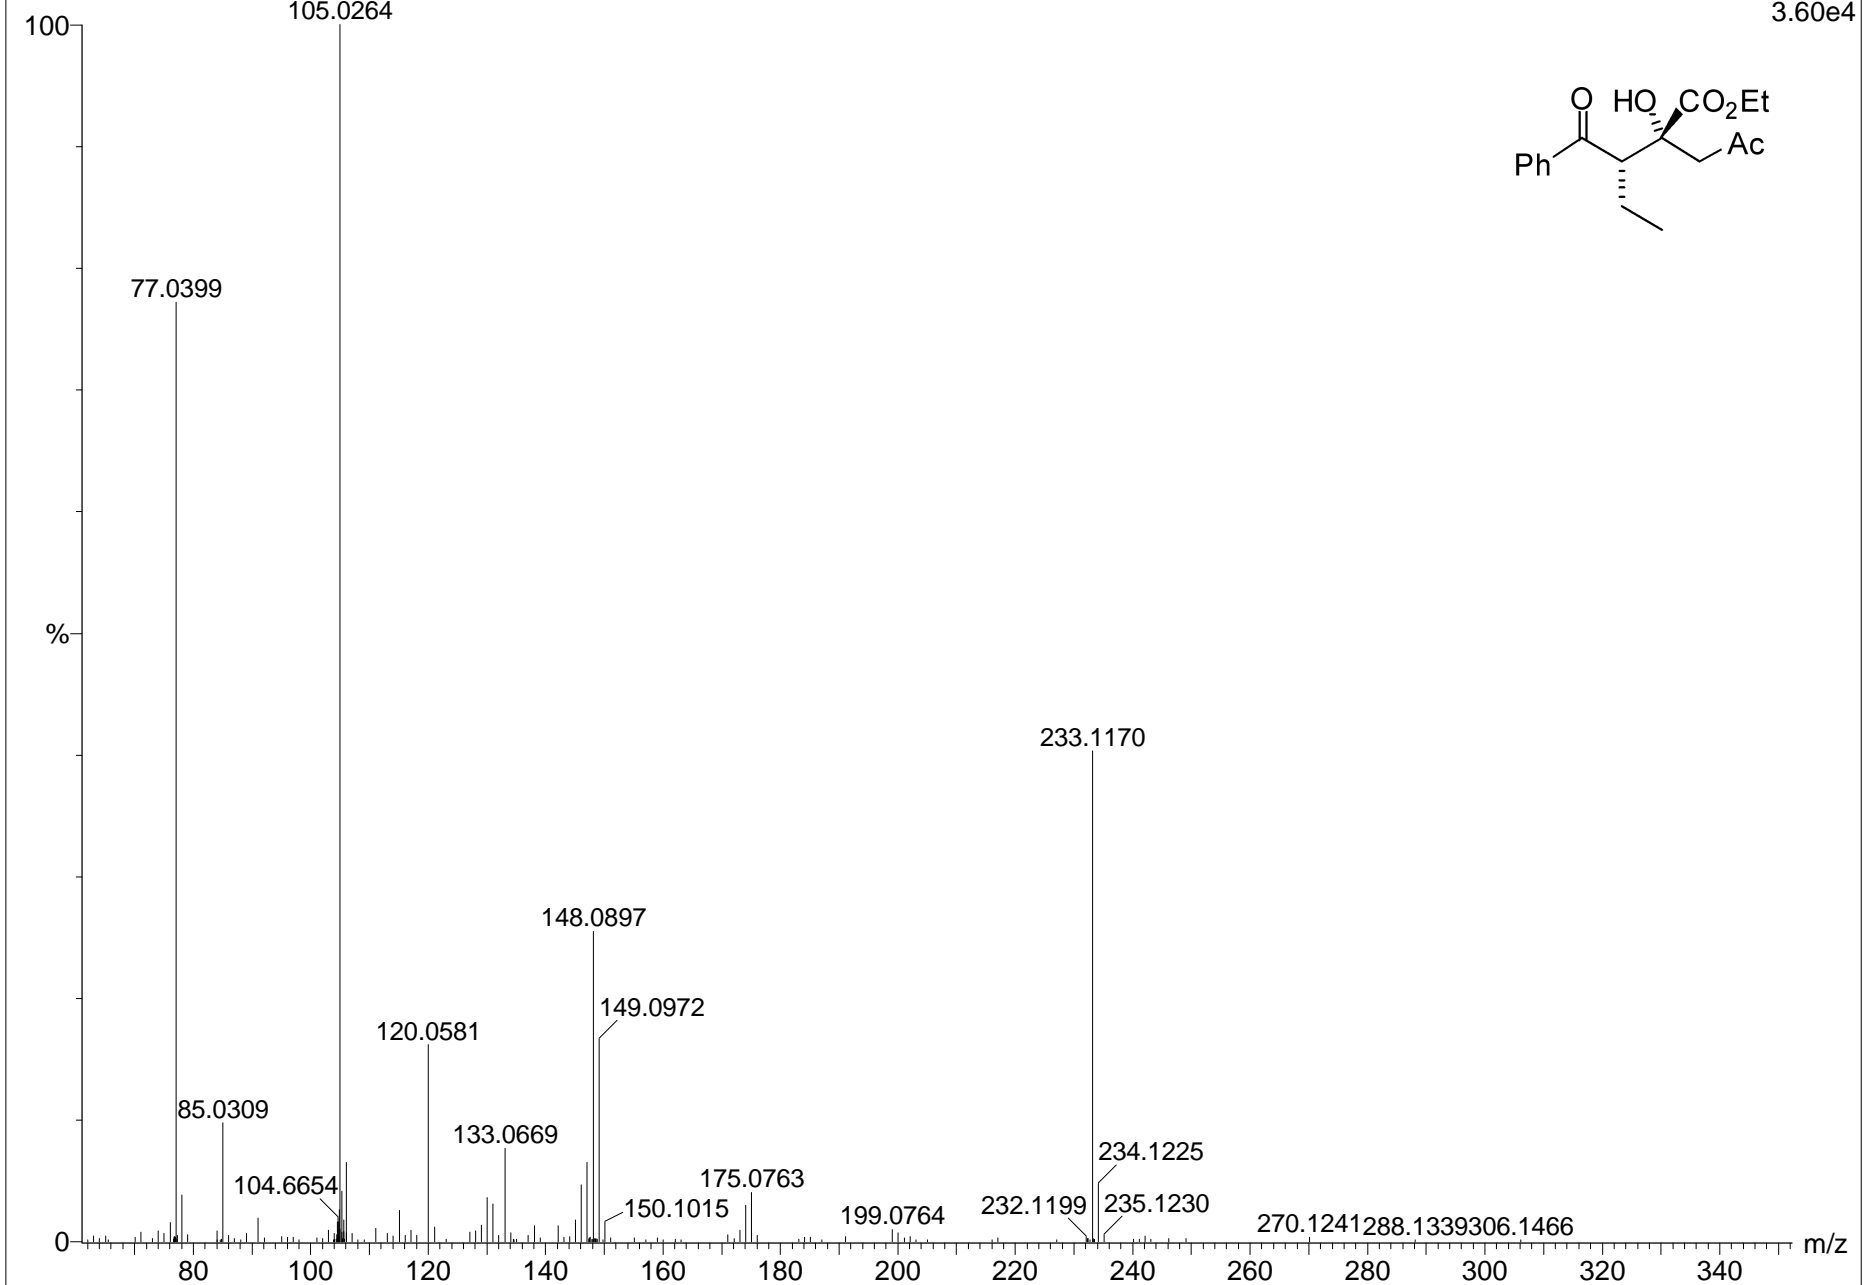

SAMPLE INFORMATION

|                   |                        |                     |              |
|-------------------|------------------------|---------------------|--------------|
| Sample Name:      | yj-1                   | Acquired By:        | System       |
| Sample Type:      | Unknown                | Sample Set Name:    |              |
| Vial:             | 5                      | Acq. Method Set:    | szx          |
| Injection #:      | 6                      | Processing Method:  | szx1         |
| Injection Volume: | 20.00 ul               | Channel Name:       | 254.0nm      |
| Run Time:         | 25.0 Minutes           | Proc. Chnl. Descr.: | PDA 254.0 nm |
| Date Acquired:    | 2008-2-29 18:45:13 CST |                     |              |
| Date Processed:   | 2008-2-29 19:59:42 CST |                     |              |

Auto-Scaled Chromatogram

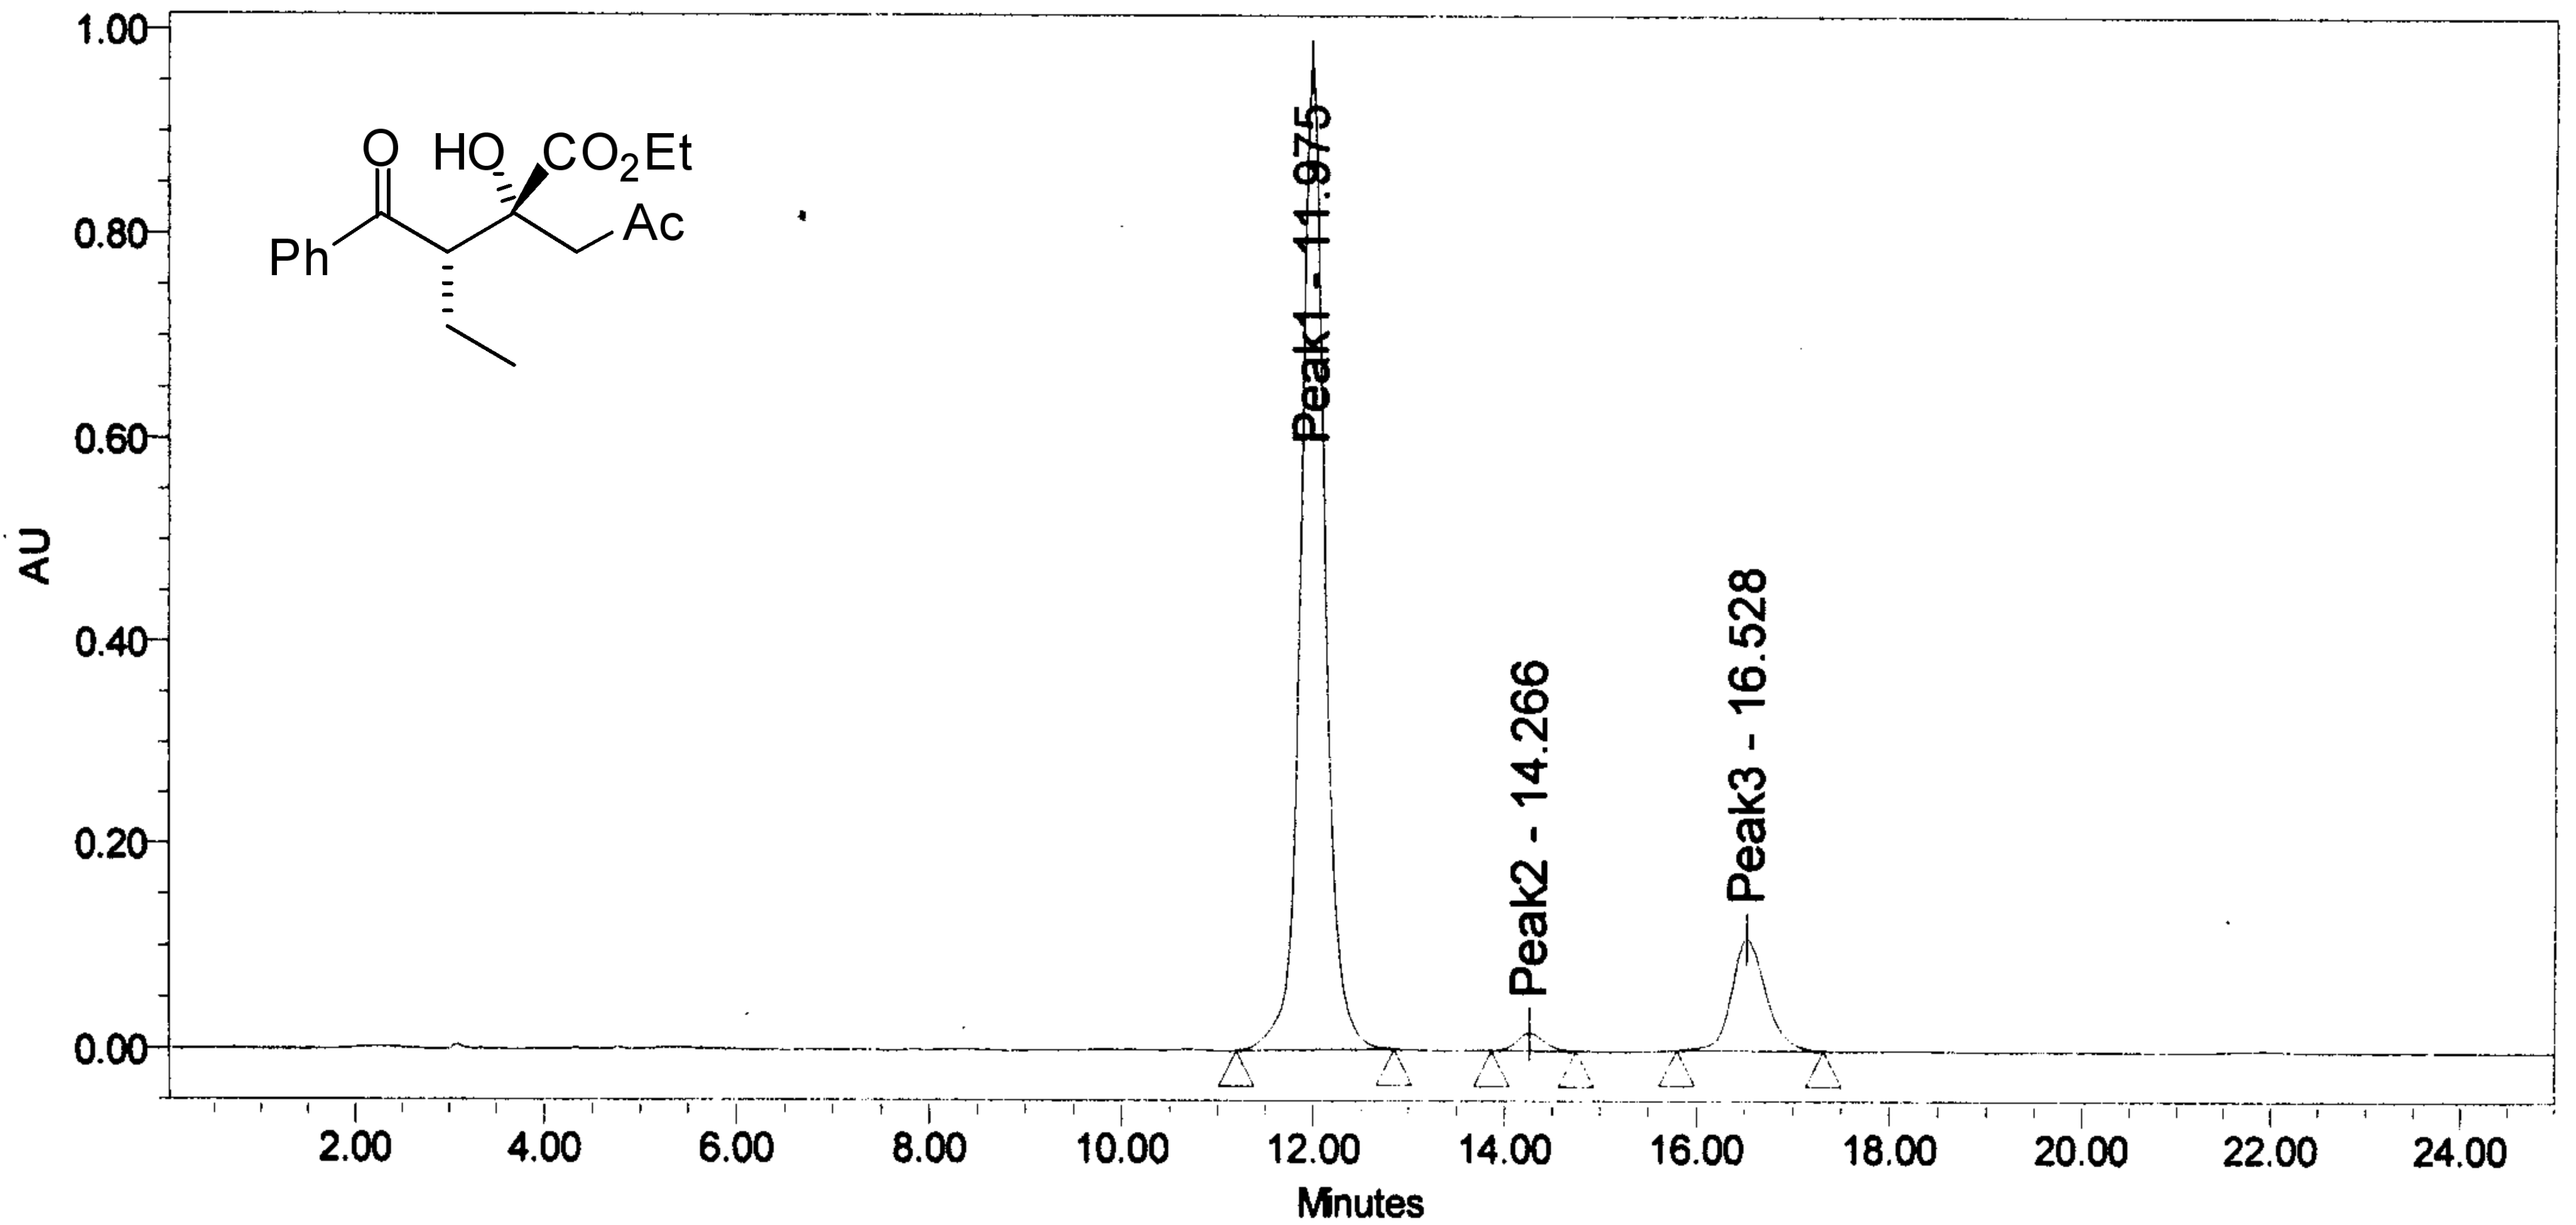

Peak Results

|   | RT     | Area     | % Area | Height | Amount | Units |
|---|--------|----------|--------|--------|--------|-------|
| 1 | 11.975 | 17014684 | 84.96  | 968704 |        |       |
| 2 | 14.266 | 324663   | 1.62   | 16803  |        |       |
| 3 | 16.528 | 2686320  | 13.41  | 108640 |        |       |

ee. 96%

dr = 6.5:1

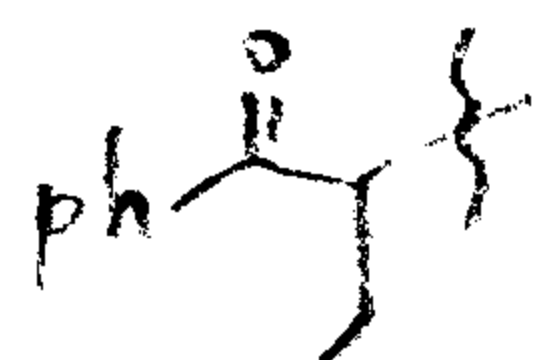

## SAMPLE INFORMATION

|                   |                        |                     |              |
|-------------------|------------------------|---------------------|--------------|
| Sample Name:      | yj-1-rac               | Acquired By:        | System       |
| Sample Type:      | Unknown                | Sample Set Name:    |              |
| Vial:             | 5                      | Acq. Method Set:    | szx          |
| Injection #:      | 5                      | Processing Method:  | dzh          |
| Injection Volume: | 20.00 ul               | Channel Name:       | 254.0nm      |
| Run Time:         | 35.0 Minutes           | Proc. Chnl. Descr.: | PDA 254.0 nm |
| Date Acquired:    | 2008-2-29 18:19:58 CST |                     |              |
| Date Processed:   | 2008-2-29 18:47:10 CST |                     |              |

## Auto-Scaled Chromatogram

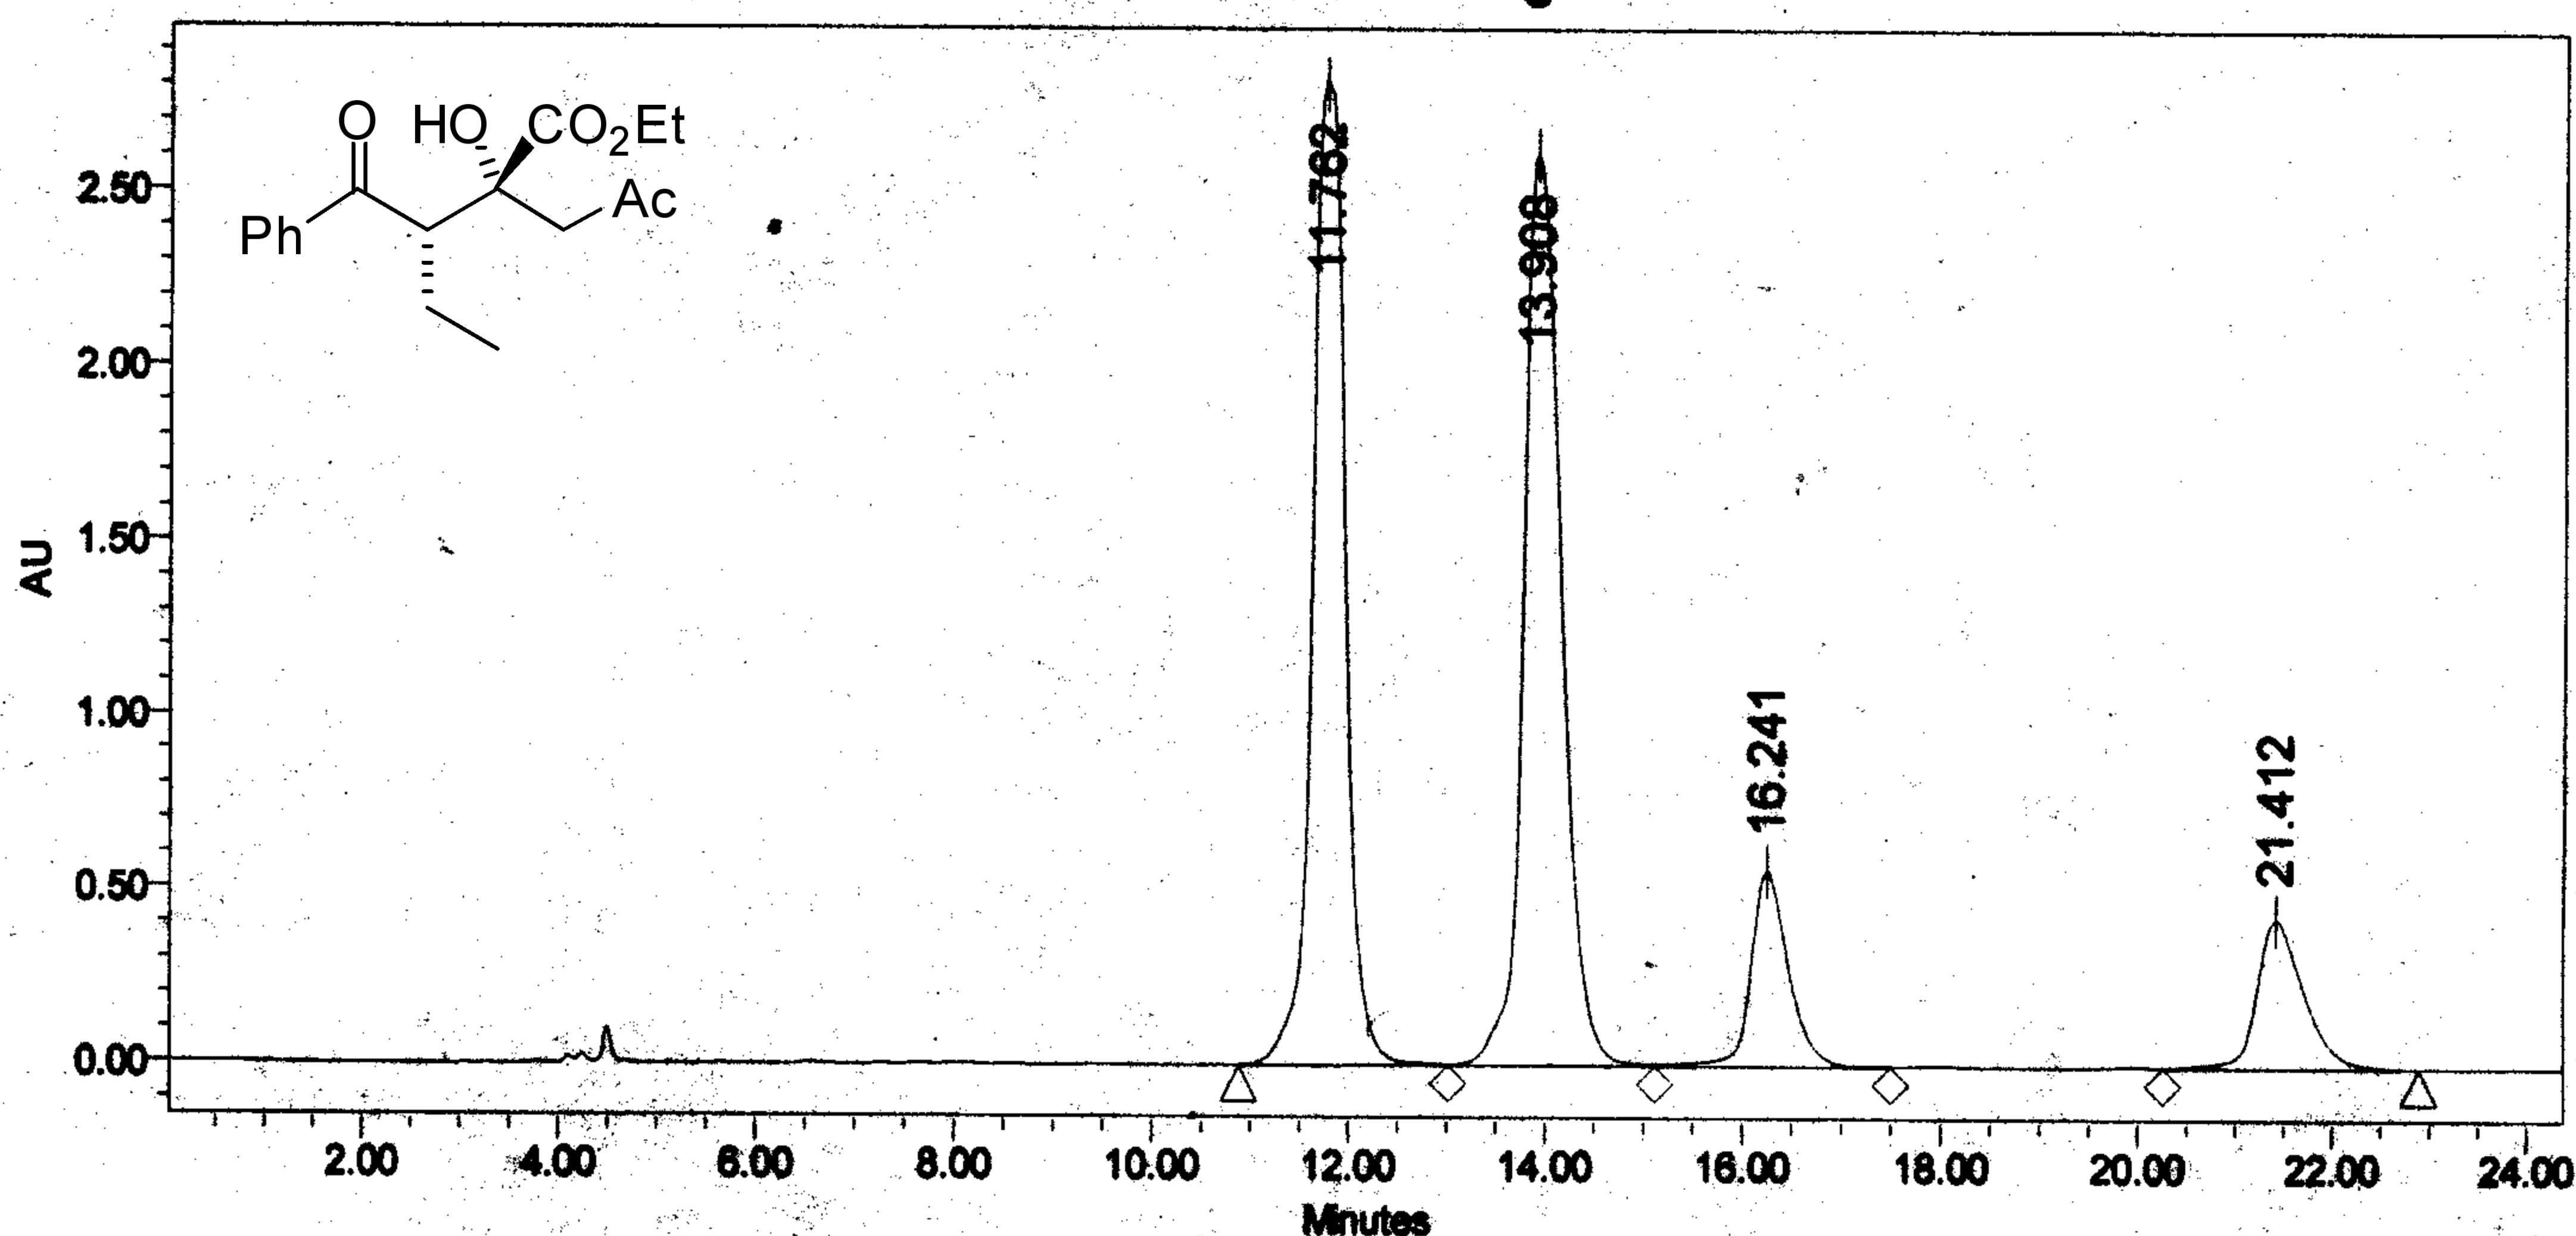

## Peak Results

|   | RT     | Area     | % Area | Height  | Amount | Units |
|---|--------|----------|--------|---------|--------|-------|
| 1 | 11.762 | 65281040 | 39.78  | 2812983 |        |       |
| 2 | 13.908 | 69608090 | 42.41  | 2616000 |        |       |
| 3 | 16.241 | 14826263 | 9.03   | 560662  |        |       |
| 4 | 21.412 | 14398035 | 8.77   | 423934  |        |       |

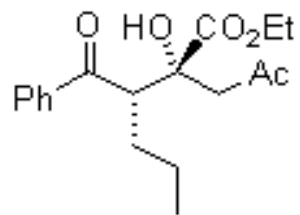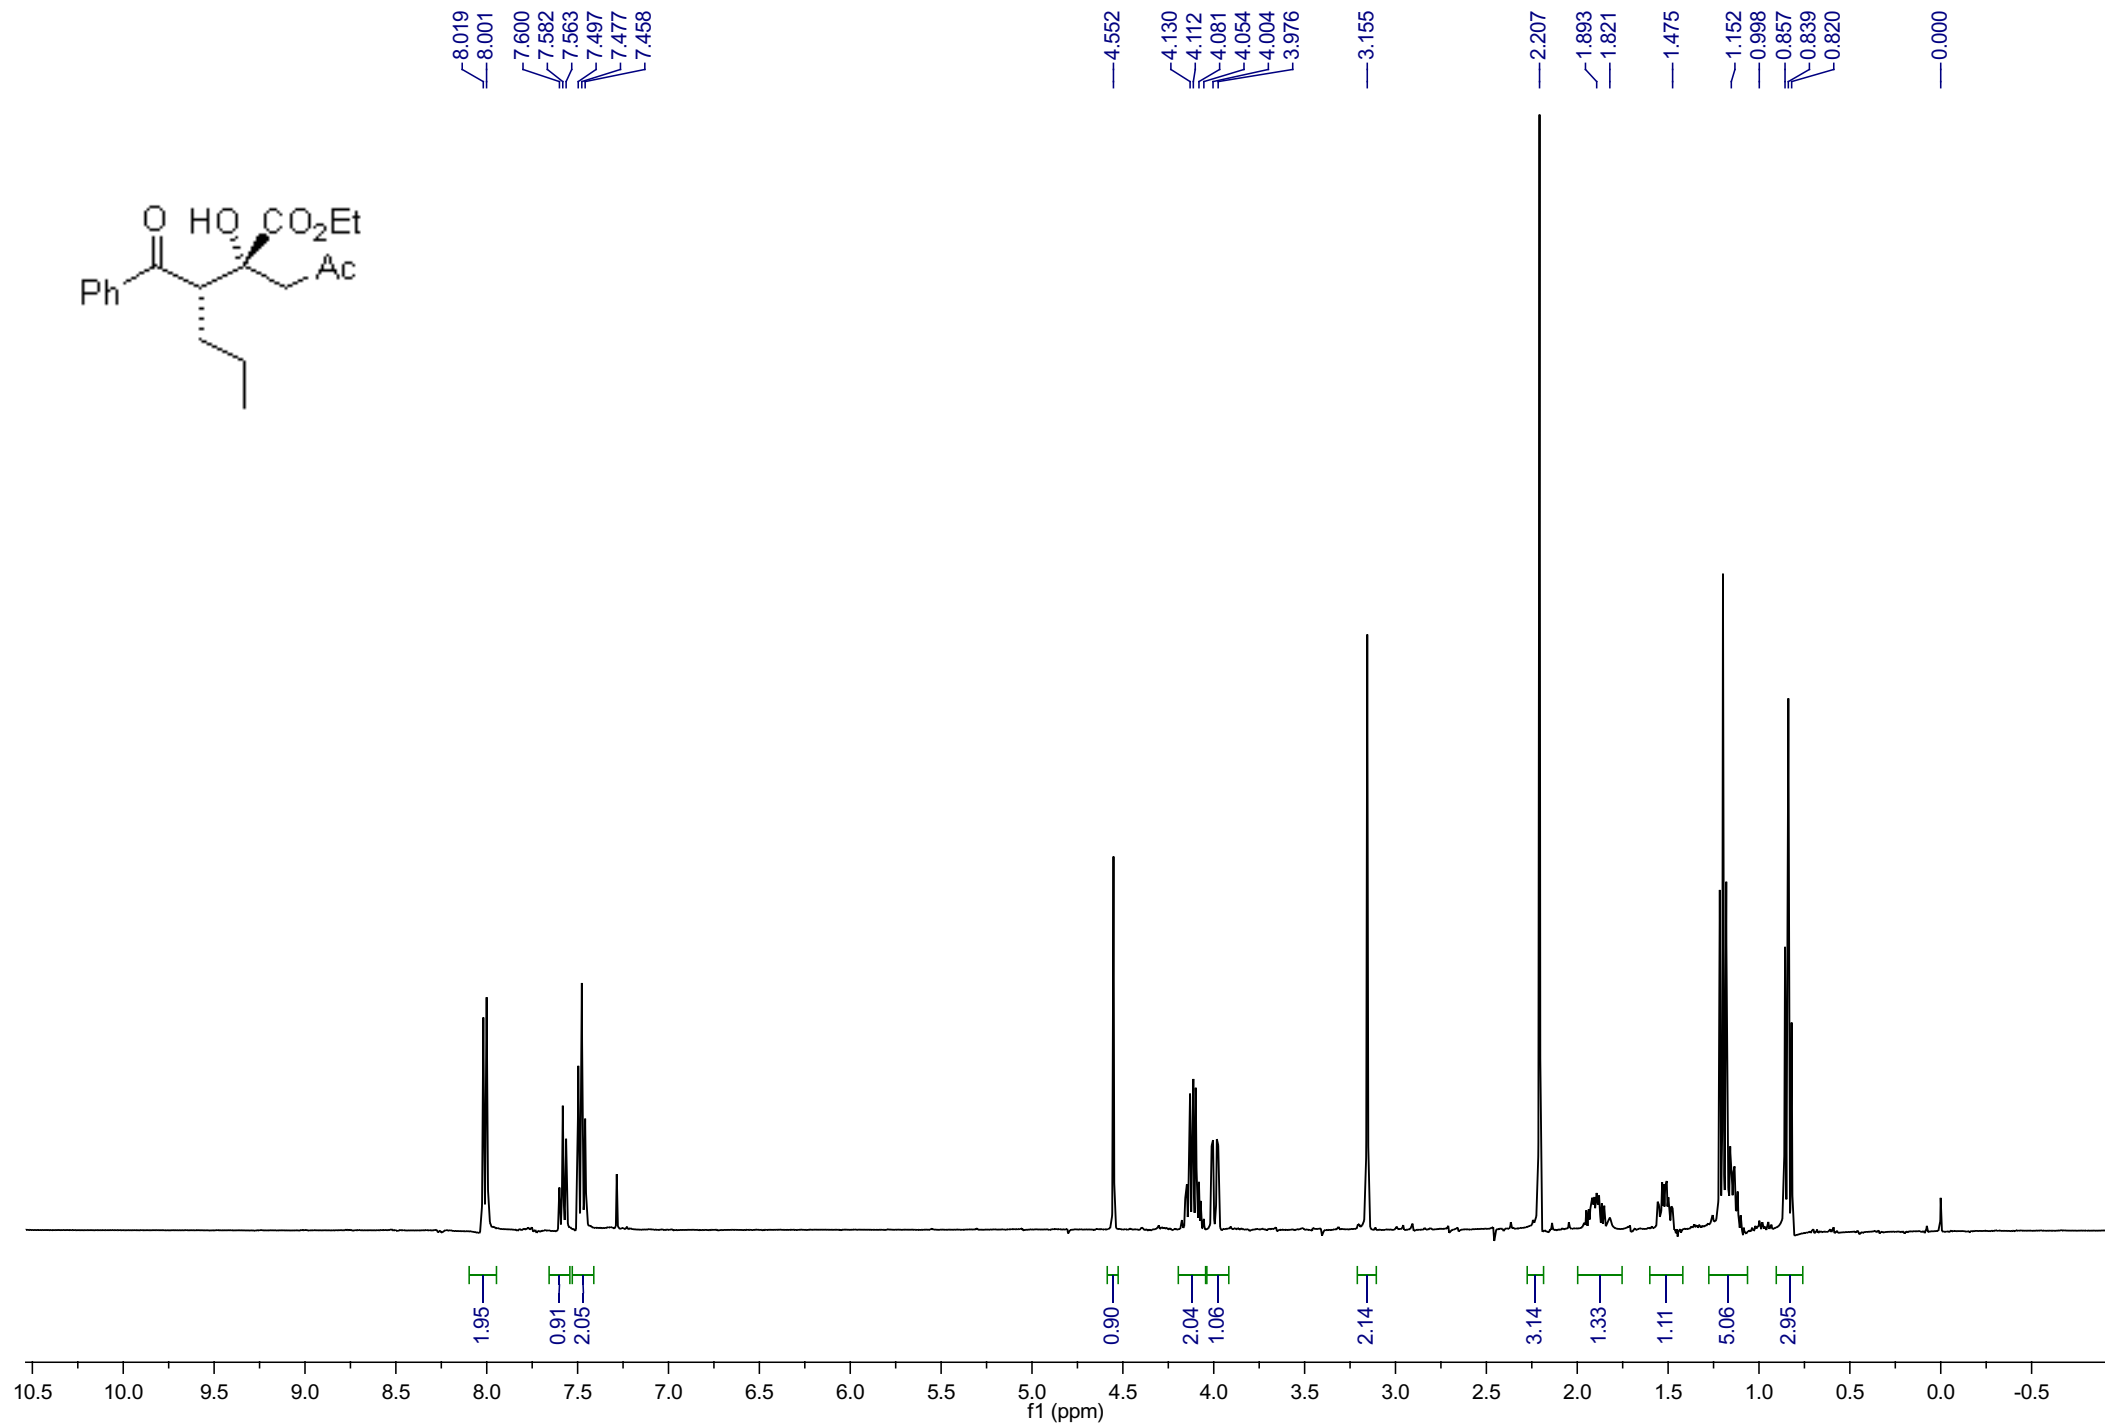

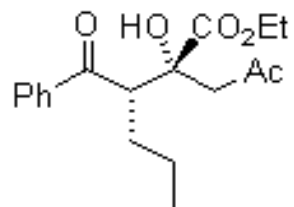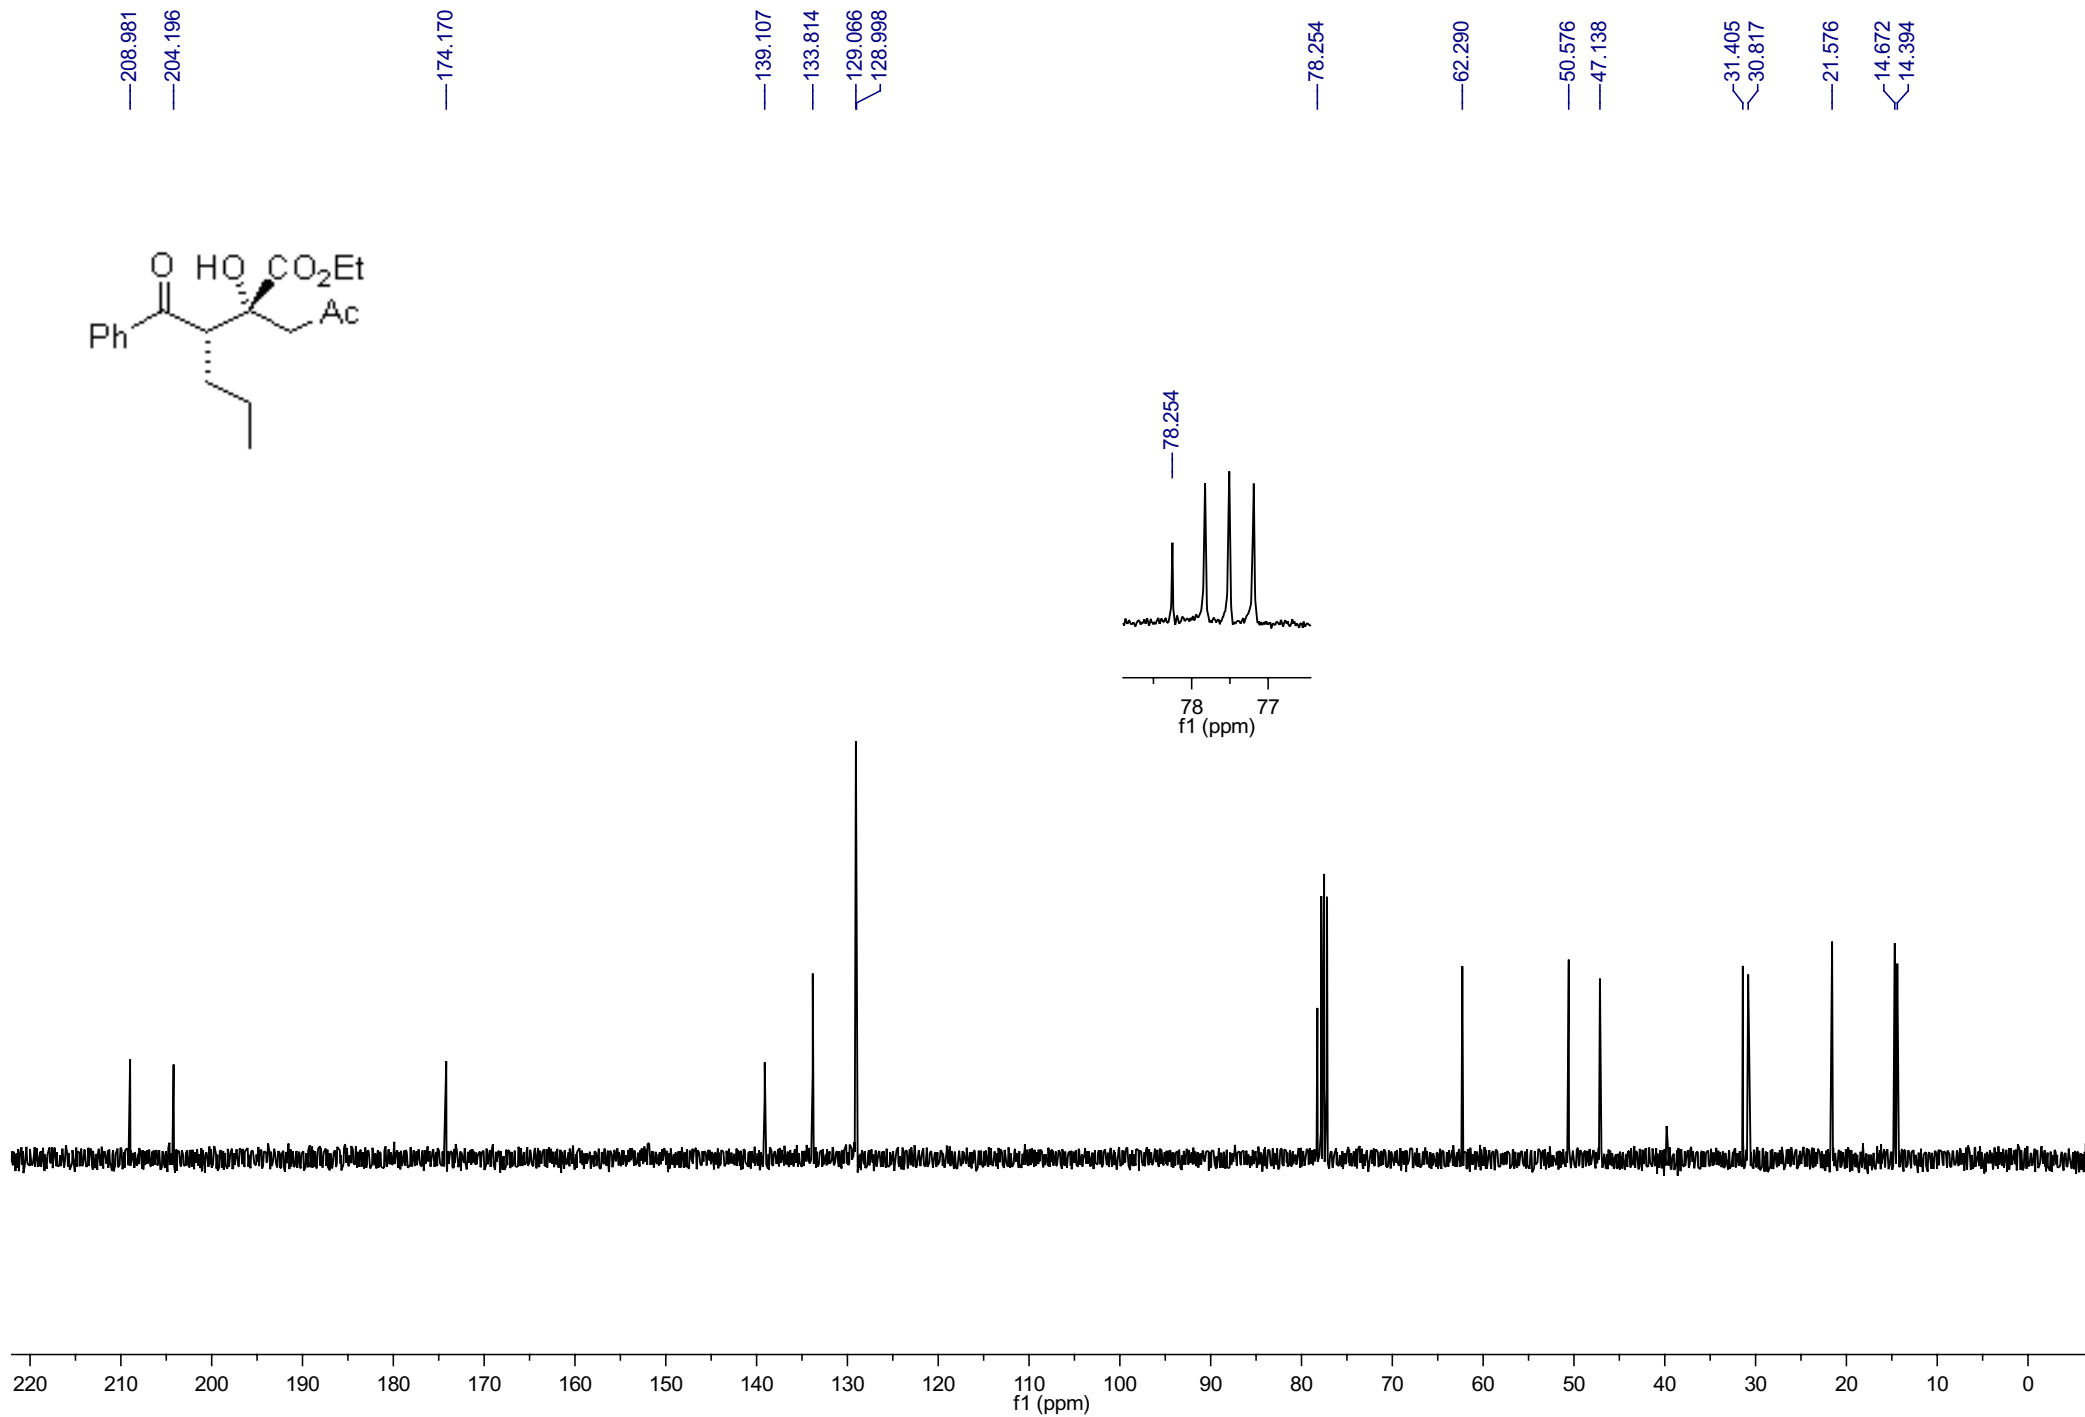

SUDA-TOFMS-EI-080704

yj-6 115 (1.917) Cm (109:115-(134:142+158:165))

TOF MS EI+  
2.61e5

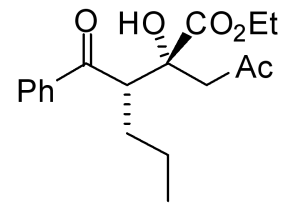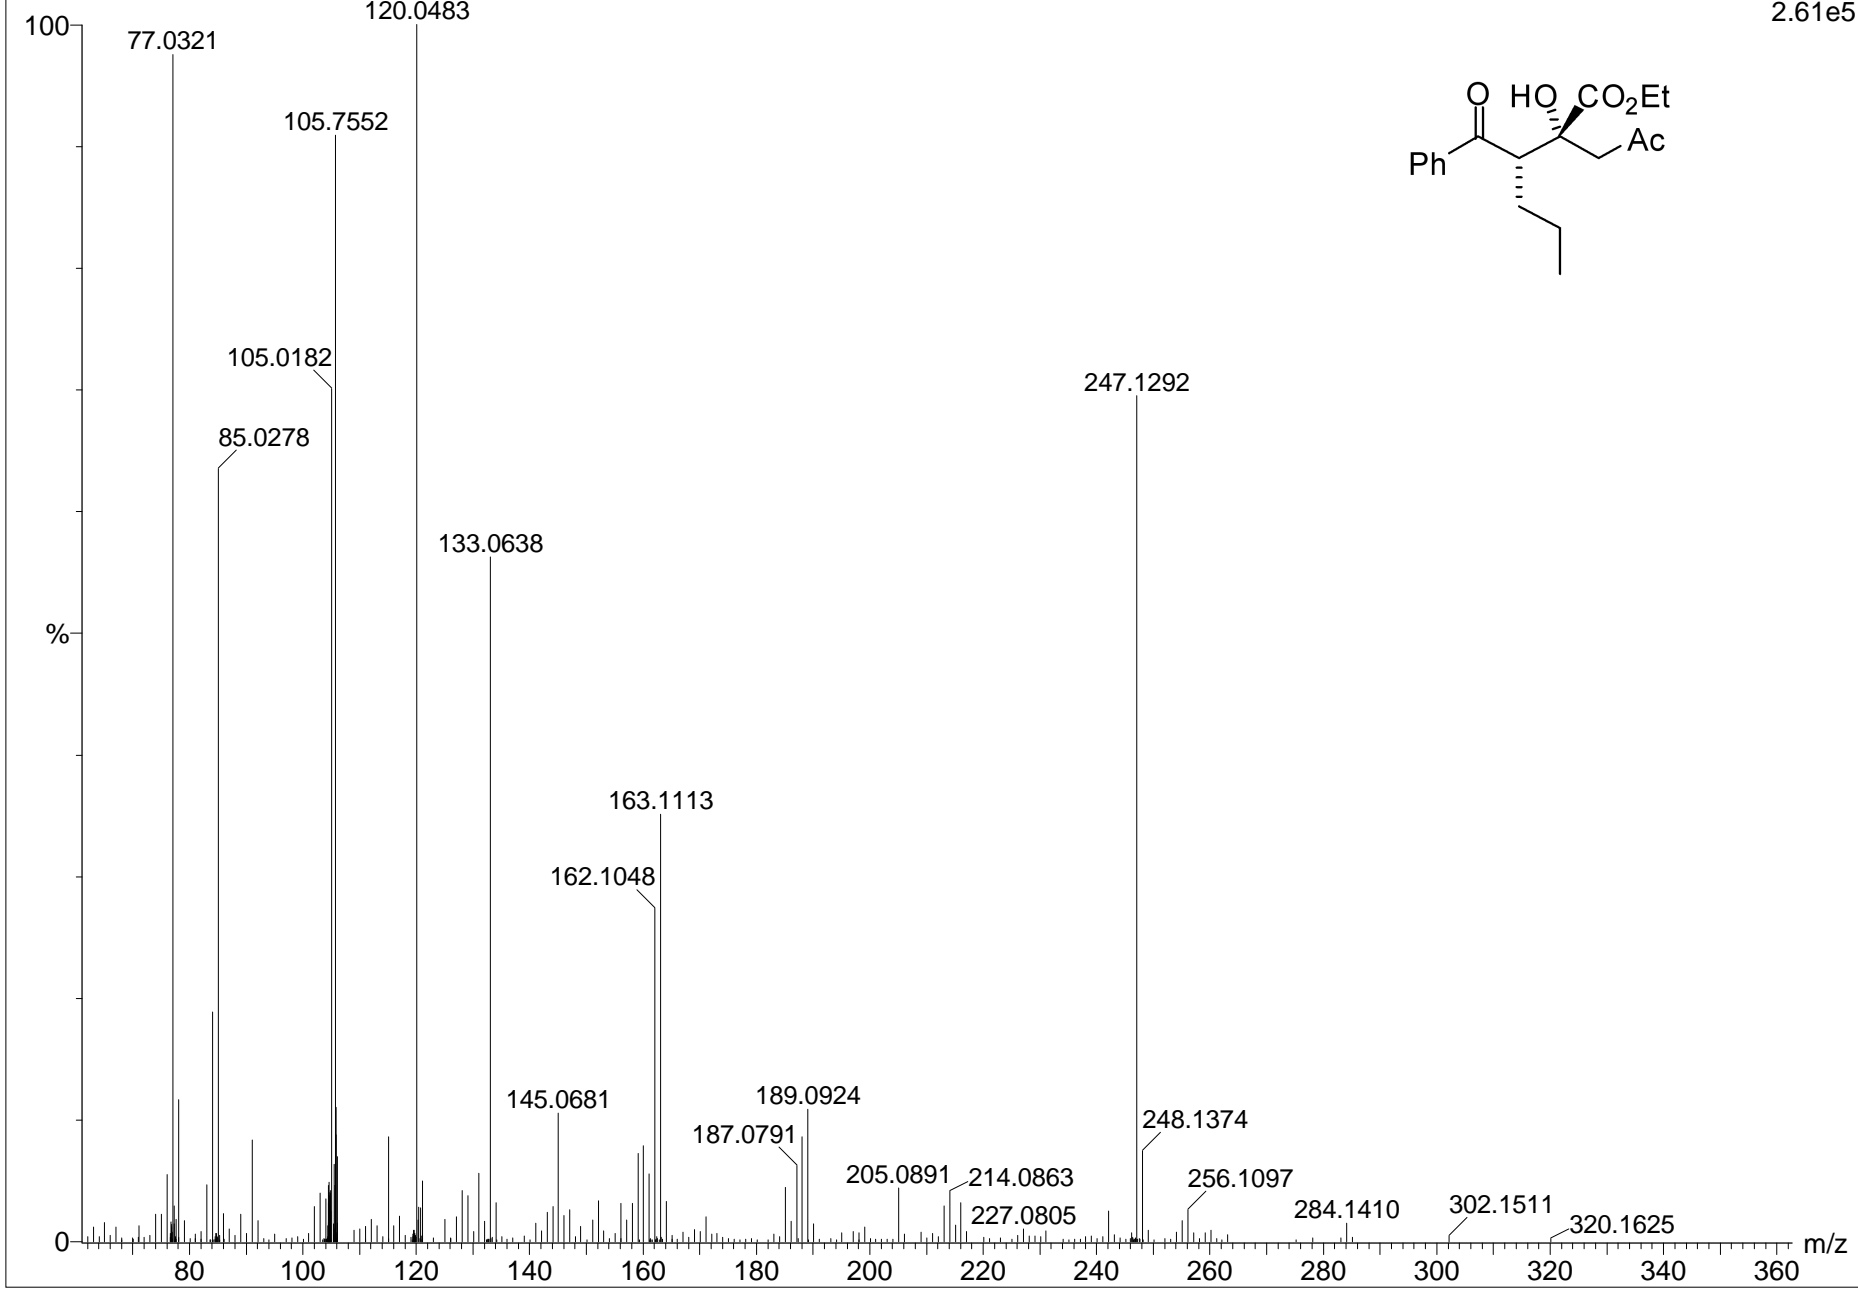



SAMPLE INFORMATION

|                   |                        |                     |              |
|-------------------|------------------------|---------------------|--------------|
| Sample Name:      | yj-2                   | Acquired By:        | System       |
| Sample Type:      | Unknown                | Sample Set Name:    |              |
| Vial:             | 5                      | Acq. Method Set:    | szx          |
| Injection #:      | 8                      | Processing Method:  | szx1         |
| Injection Volume: | 20.00 ul               | Channel Name:       | 254.0nm      |
| Run Time:         | 22.0 Minutes           | Proc. Chnl. Descr.: | PDA 254.0 nm |
| Date Acquired:    | 2008-2-29 19:38:49 CST |                     |              |
| Date Processed:   | 2008-2-29 20:03:54 CST |                     |              |

Auto-Scaled Chromatogram

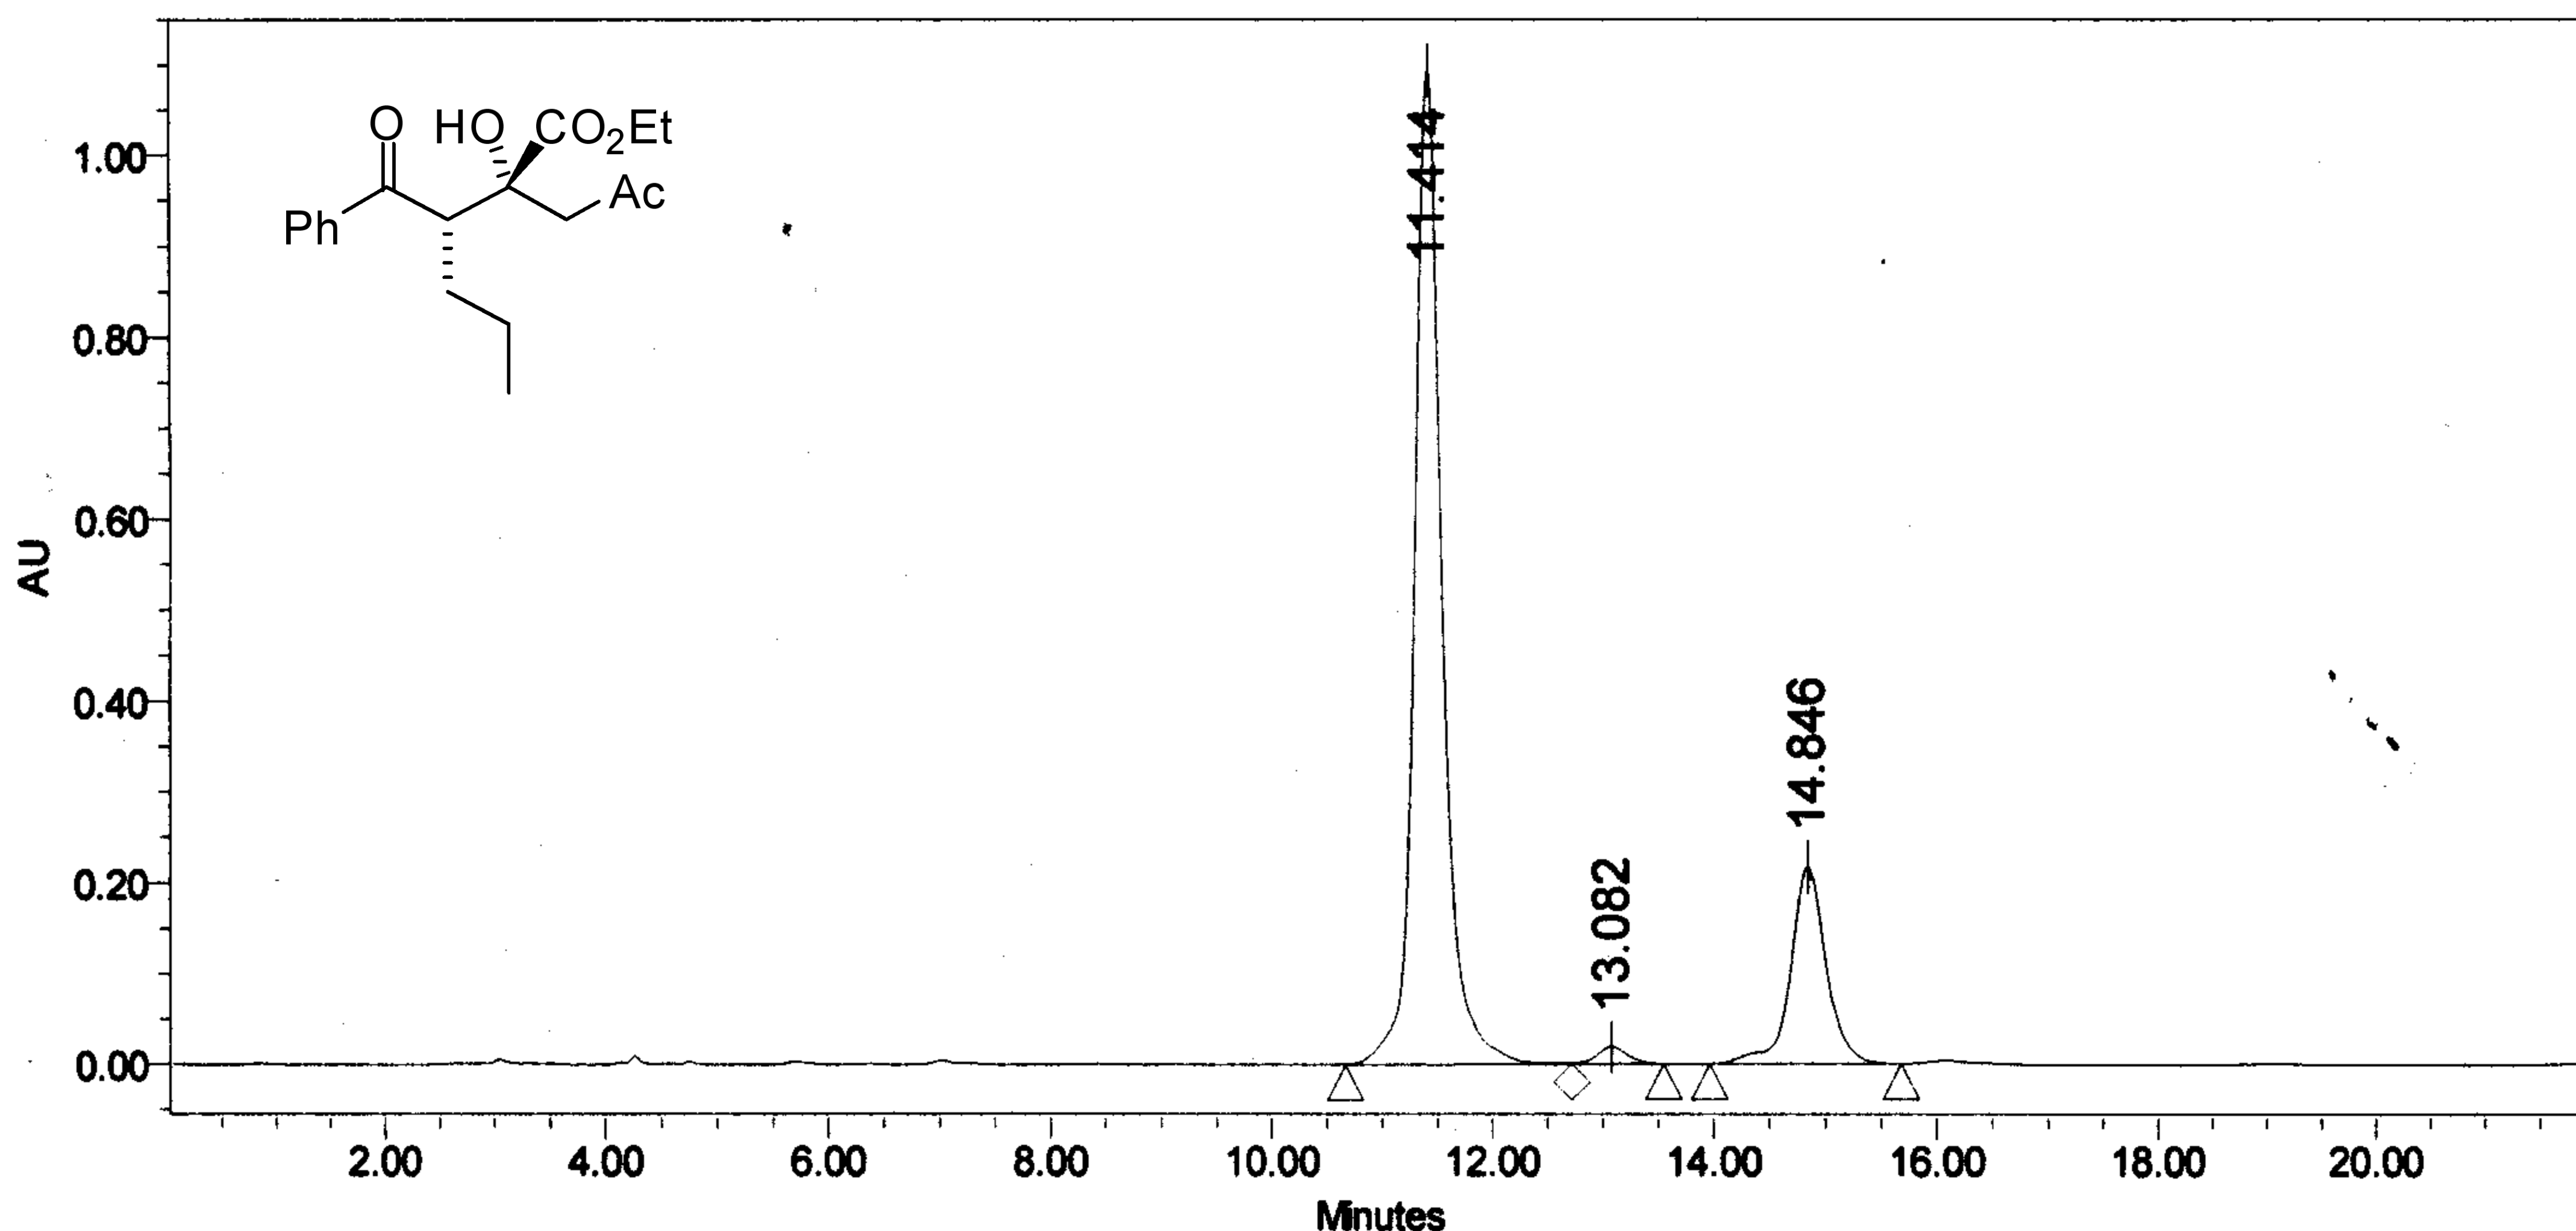

Peak Results

|   | RT     | Area     | % Area | Height  | Amount | Units |
|---|--------|----------|--------|---------|--------|-------|
| 1 | 11.414 | 19025436 | 78.43  | 1095599 |        |       |
| 2 | 13.082 | 363608   | 1.50   | 19048   |        |       |
| 3 | 14.846 | 4867892  | 20.07  | 217621  |        |       |

96%

d.r. = 4:1

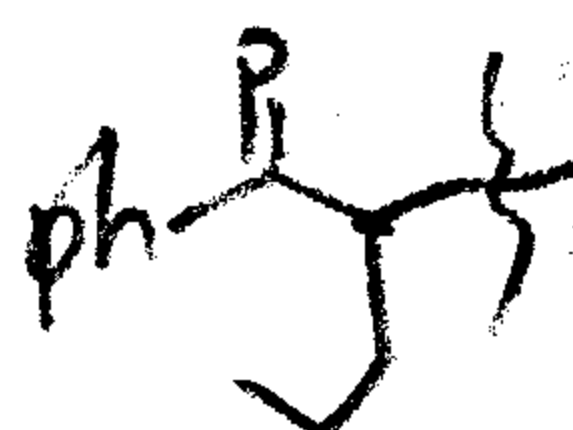

## SAMPLE INFORMATION

|                   |                        |                     |              |
|-------------------|------------------------|---------------------|--------------|
| Sample Name:      | yj-2-rac               | Acquired By:        | System       |
| Sample Type:      | Unknown                | Sample Set Name:    |              |
| Vial:             | 5                      | Acq. Method Set:    | szx          |
| Injection #:      | 7                      | Processing Method:  | szx1         |
| Injection Volume: | 20.00 ul               | Channel Name:       | 254.0nm      |
| Run Time:         | 30.0 Minutes           | Proc. Chnl. Descr.: | PDA 254.0 nm |
| Date Acquired:    | 2008-2-29 19:10:46 CST |                     |              |
| Date Processed:   | 2008-2-29 20:00:40 CST |                     |              |

## Auto-Scaled Chromatogram

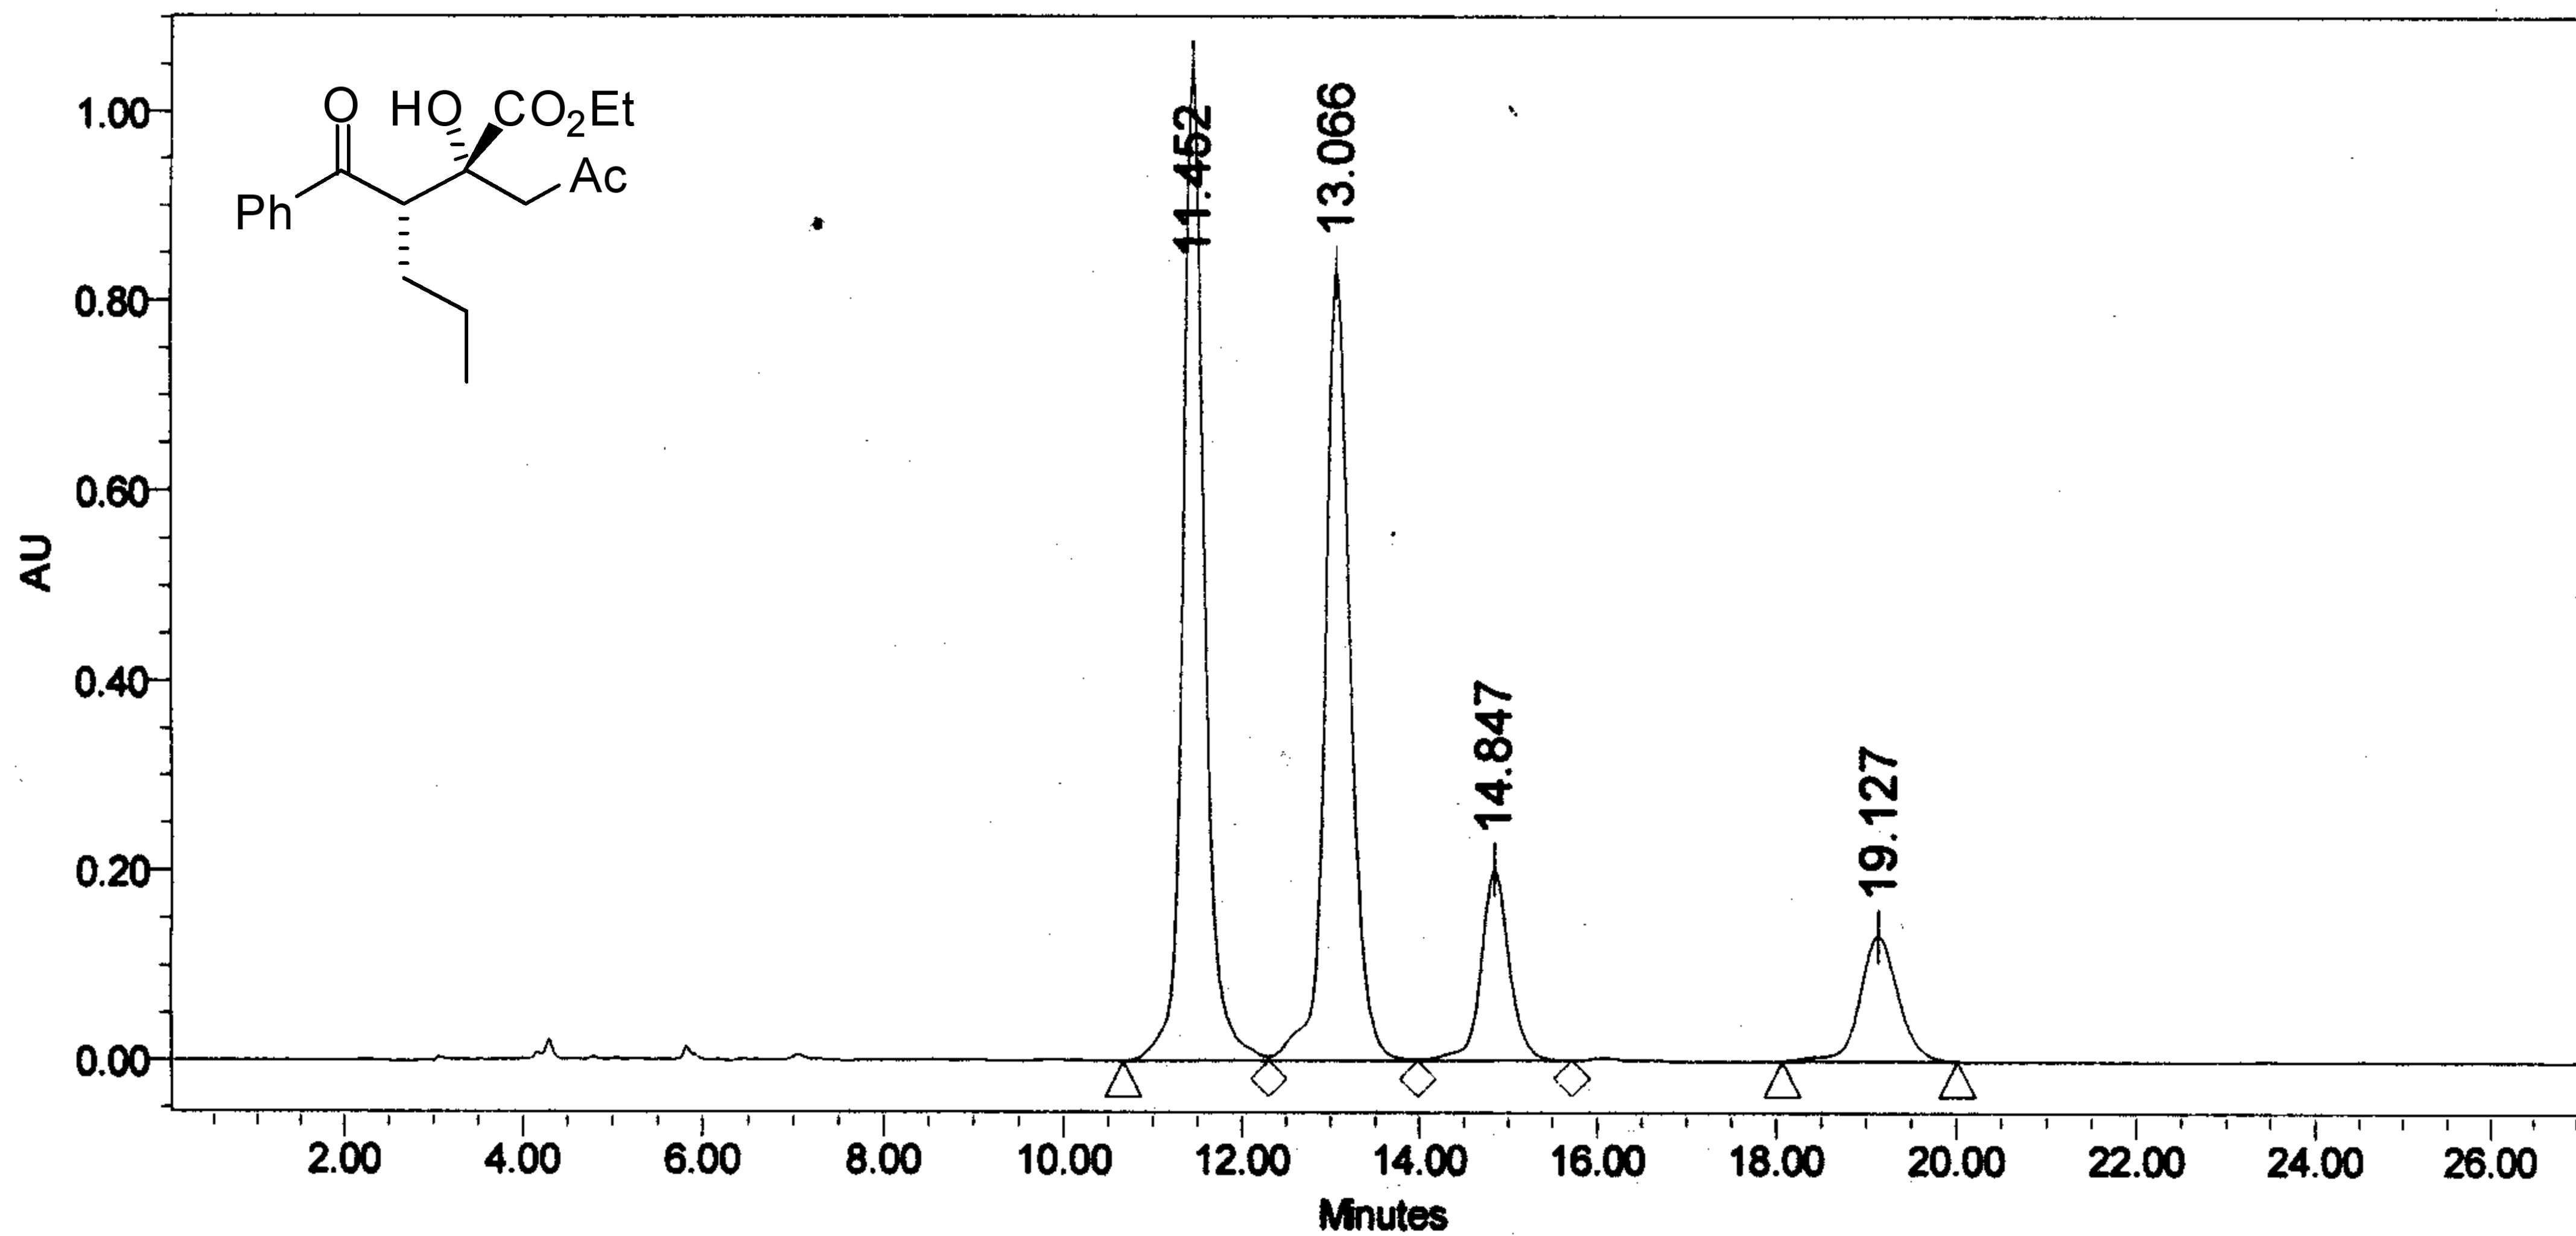

## Peak Results

|   | RT     | Area     | % Area | Height  | Amount | Units |
|---|--------|----------|--------|---------|--------|-------|
| 1 | 11.452 | 17863641 | 41.65  | 1048858 |        |       |
| 2 | 13.066 | 16549476 | 38.58  | 830936  |        |       |
| 3 | 14.847 | 4506415  | 10.51  | 201703  |        |       |
| 4 | 19.127 | 3971913  | 9.26   | 133015  |        |       |

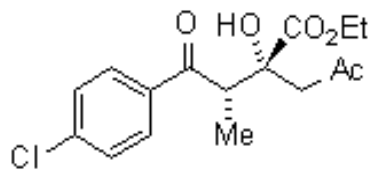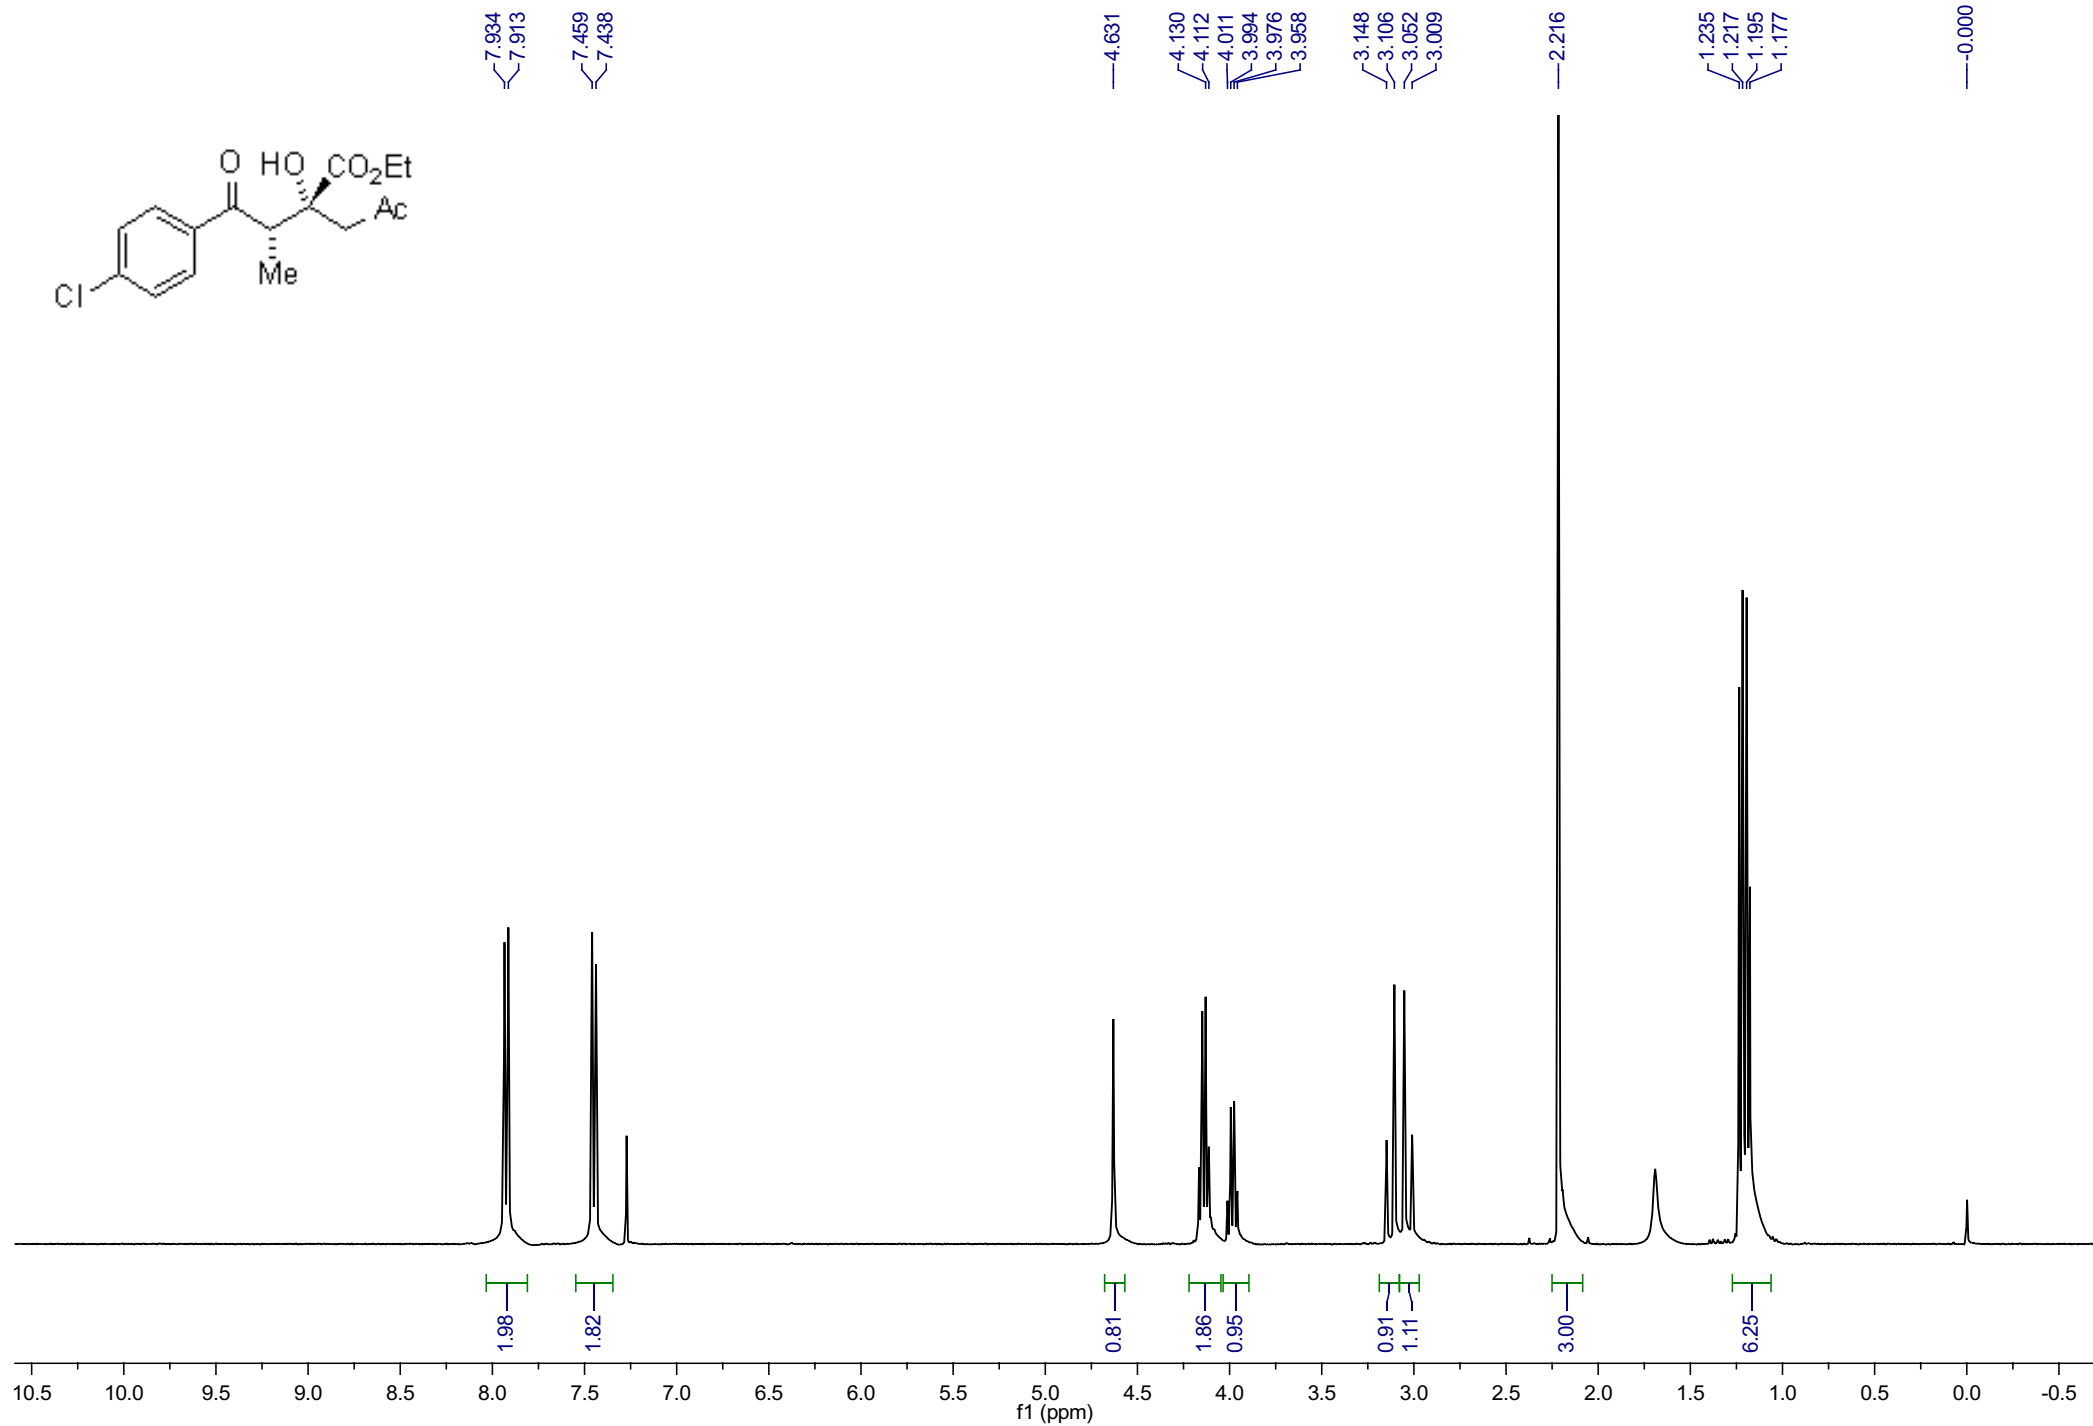

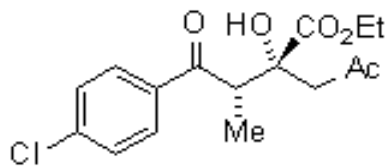

— 207.950  
— 203.270

— 174.073

— 140.418  
— 135.448  
— 130.549  
— 129.344

— 77.915

— 62.300

— 47.718  
— 44.823

— 31.507

— 14.376  
— 12.884

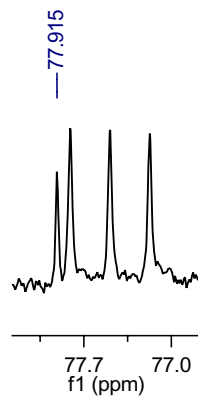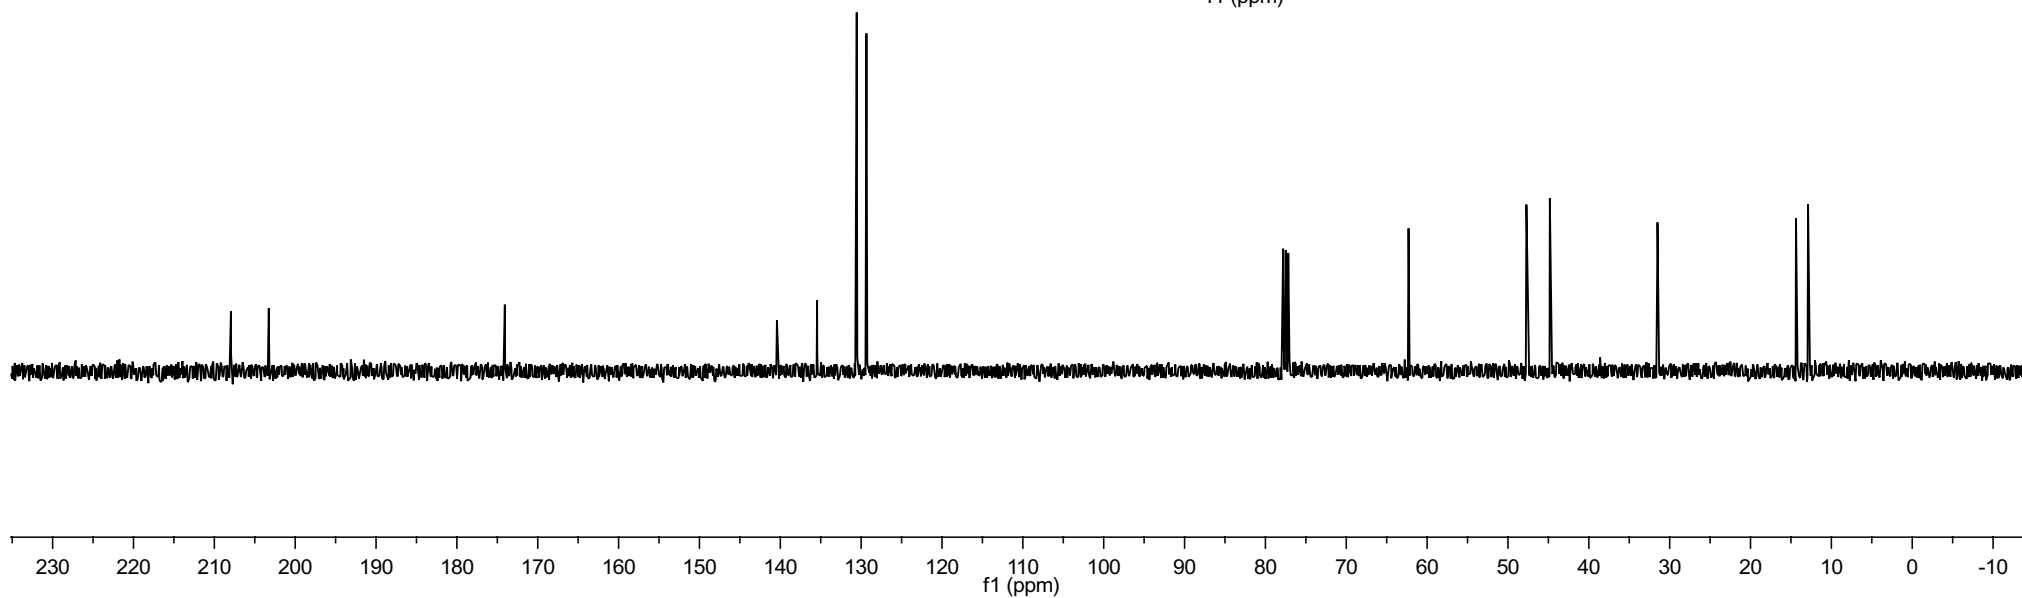

SUDA-TOFMS-EI-080723

YJ--2 114 (1.900) Cm (114-(51:54+198:200))

TOF MS EI+  
8.74e3

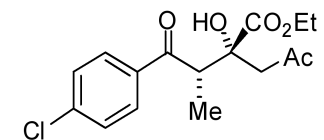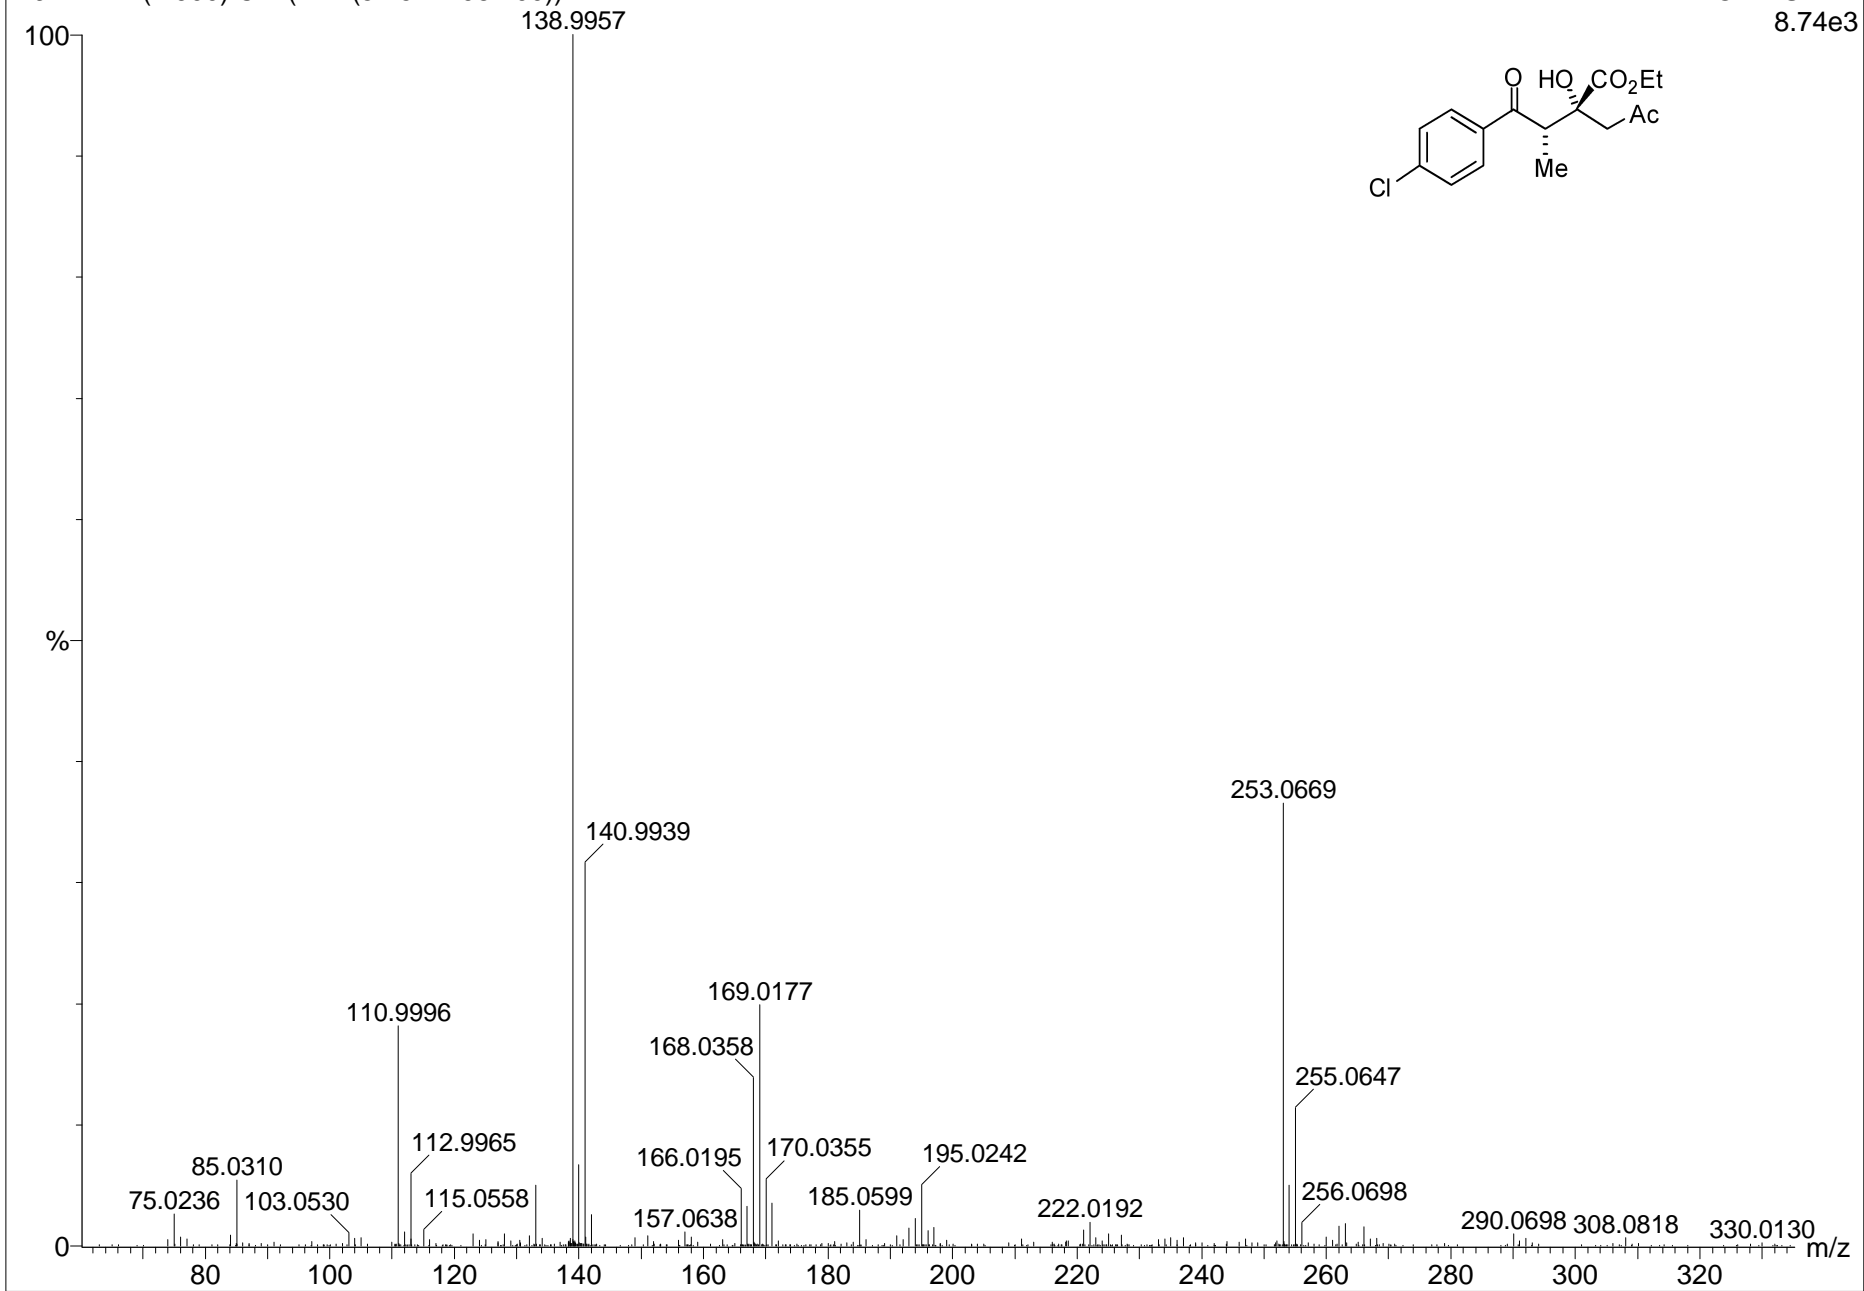

SAMPLE INFORMATION

|                   |                        |                     |              |
|-------------------|------------------------|---------------------|--------------|
| Sample Name:      | YJ-2                   | Acquired By:        | System       |
| Sample Type:      | Unknown                | Sample Set Name:    |              |
| Vial:             | 1                      | Acq. Method Set:    | Test         |
| Injection #:      | 3                      | Processing Method:  | dzh          |
| Injection Volume: | 10.00 ul               | Channel Name:       | 254.0nm      |
| Run Time:         | 32.0 Minutes           | Proc. Chnl. Descr.: | PDA 254.0 nm |
| Date Acquired:    | 2008-3-27 14:59:41 CST |                     |              |
| Date Processed:   | 2008-3-27 15:30:32 CST |                     |              |

Auto-Scaled Chromatogram

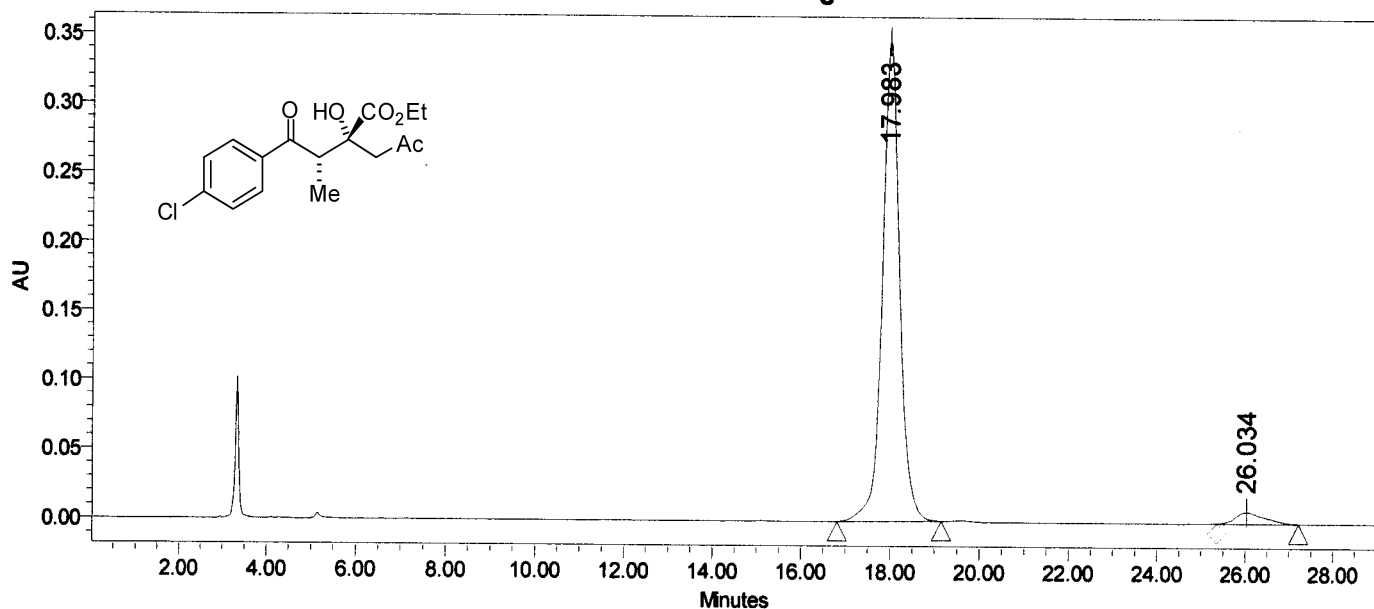

Peak Results

| Name | RT     | Height | Area    | % Area |
|------|--------|--------|---------|--------|
| 1    | 17.983 | 346392 | 9294248 | 96.06  |
| 2    | 26.034 | 8305   | 380961  | 3.94   |

22.92.12

df 79T-1

## SAMPLE INFORMATION

|                   |                        |                     |              |
|-------------------|------------------------|---------------------|--------------|
| Sample Name:      | YJ-2-rac               | Acquired By:        | System       |
| Sample Type:      | Unknown                | Sample Set Name:    |              |
| Vial:             | 1                      | Acq. Method Set:    | Test         |
| Injection #:      | 1                      | Processing Method:  | 2            |
| Injection Volume: | 10.00 ul               | Channel Name:       | 254.0nm      |
| Run Time:         | 40.0 Minutes           | Proc. Chnl. Descr.: | PDA 254.0 nm |
| Date Acquired:    | 2008-3-27 13:53:19 CST |                     |              |
| Date Processed:   | 2008-3-27 14:26:48 CST |                     |              |

## Auto-Scaled Chromatogram

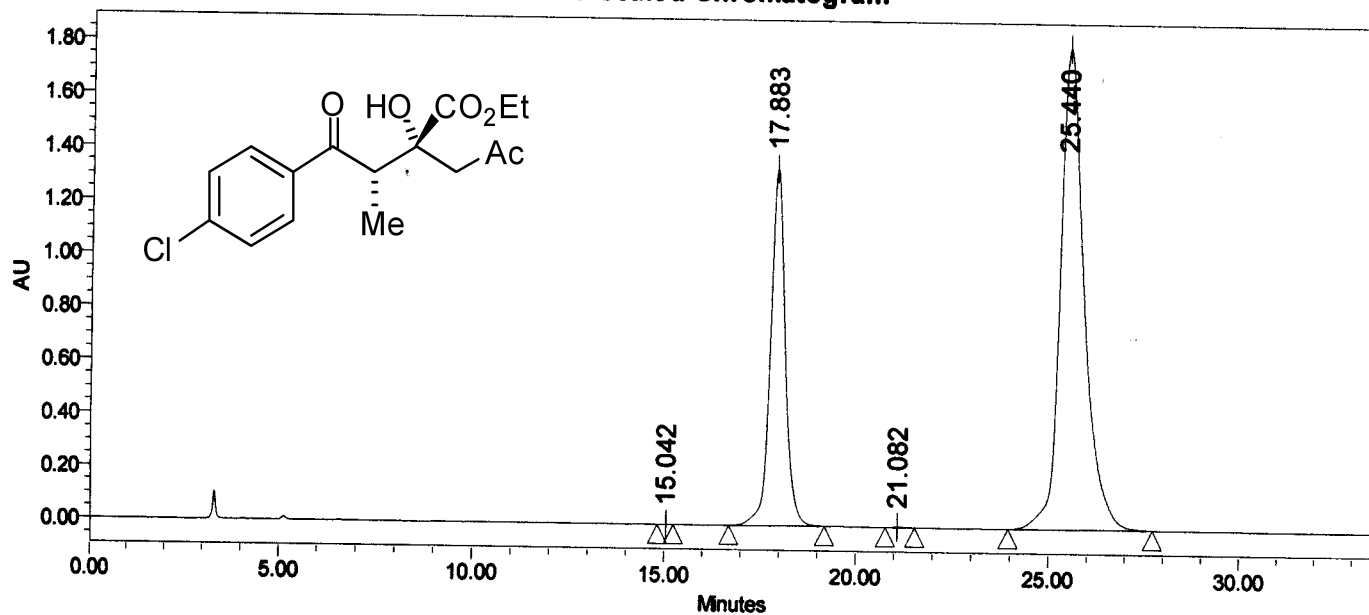

## Peak Results

| Name | RT     | Height  | Area     | % Area |
|------|--------|---------|----------|--------|
| 1    | 15.042 | 585     | 7874     | 0.01   |
| 2    | 17.883 | 1341542 | 35986269 | 31.45  |
| 3    | 21.082 | 1344    | 31063    | 0.03   |
| 4    | 25.440 | 1804895 | 78401846 | 68.52  |

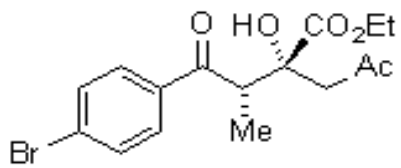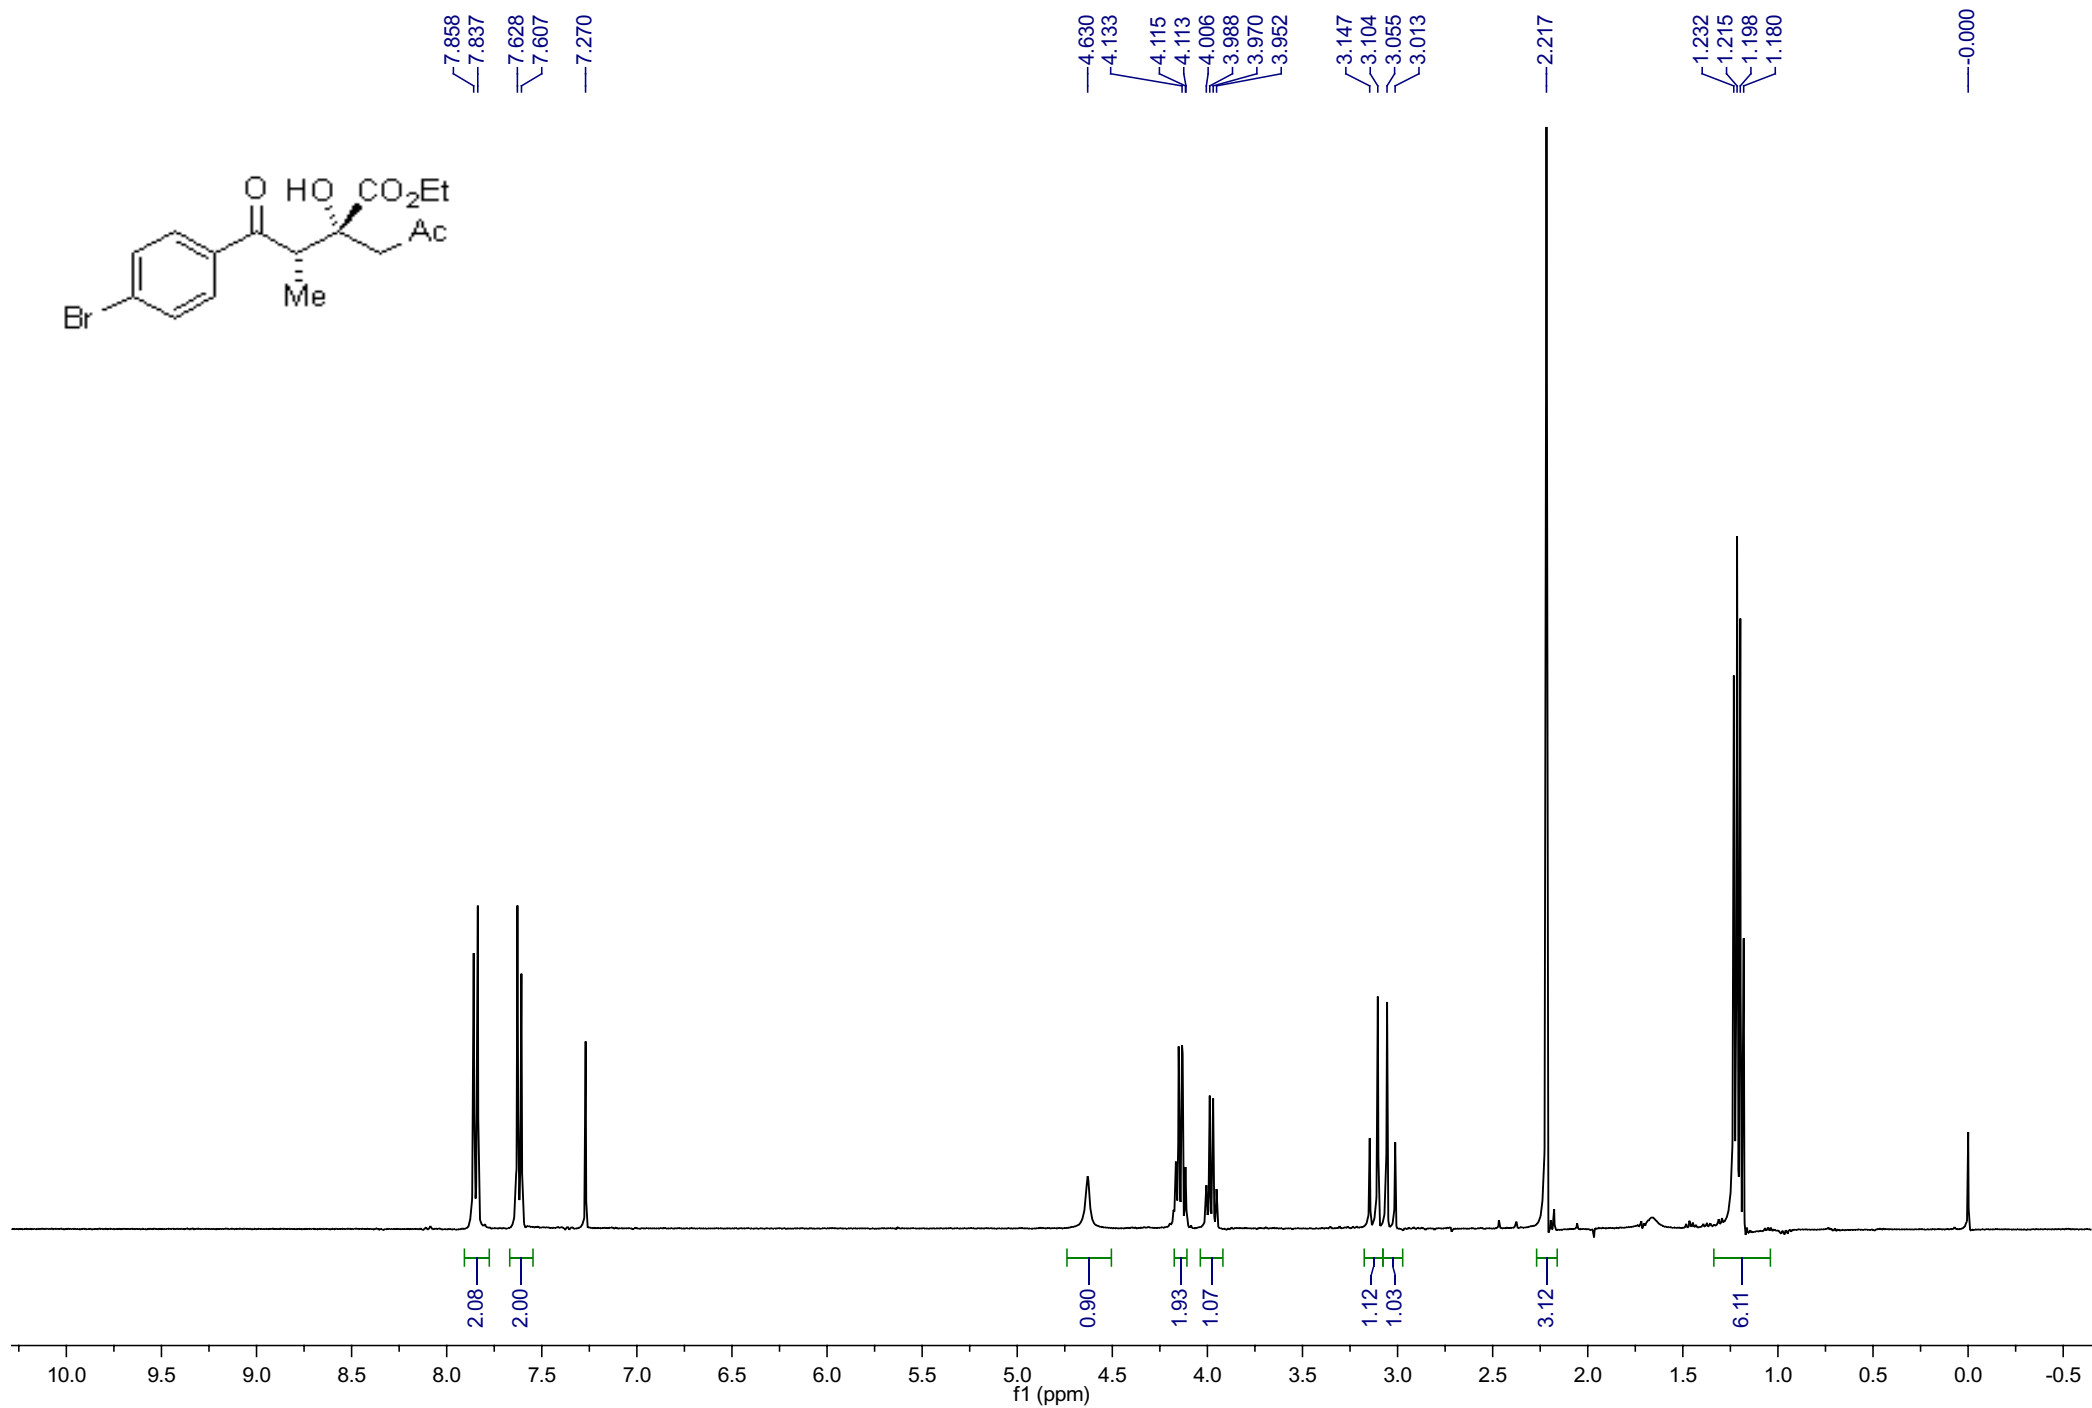



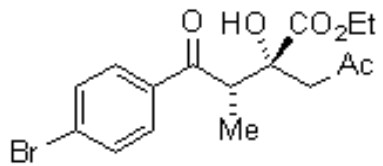

—207.991  
—203.488

—174.061

—135.831  
—132.339  
—130.639  
—129.231

—77.875

—62.319

—47.690  
—44.777

—31.516

—14.388  
—12.882

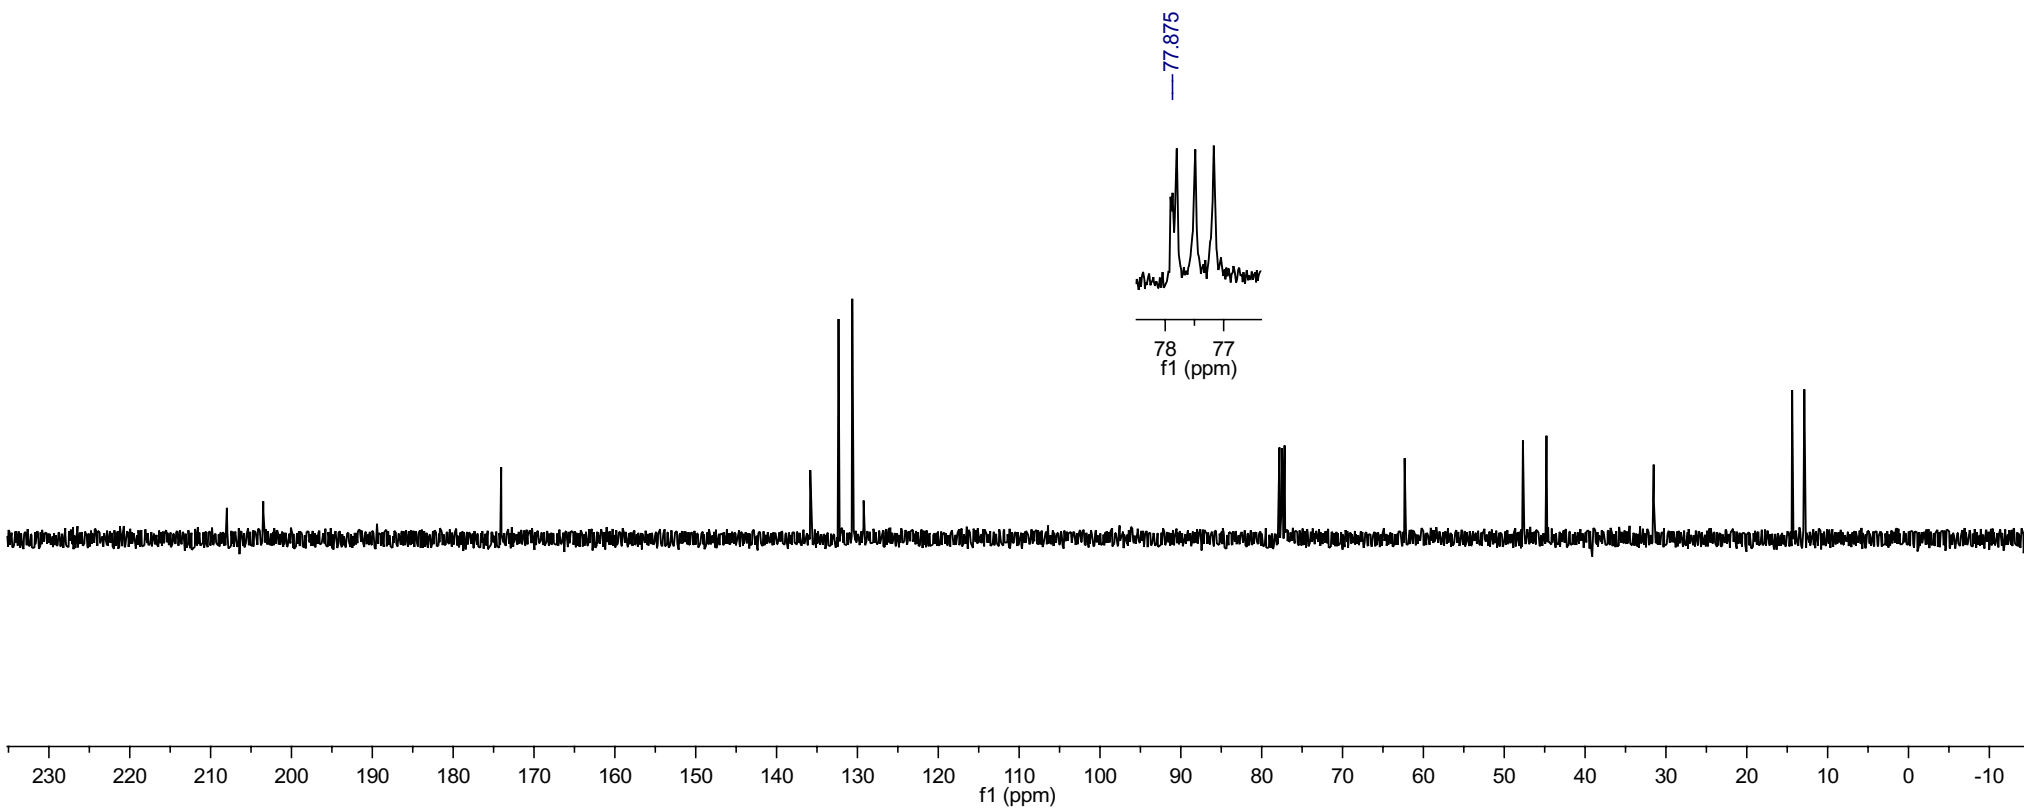

SUDA-TOFMS-EI-080703

yj-10 141 (2.350) Cm (135:141-(164:173+100:113))

TOF MS EI+  
2.16e5

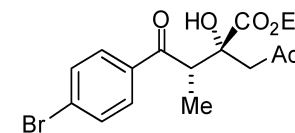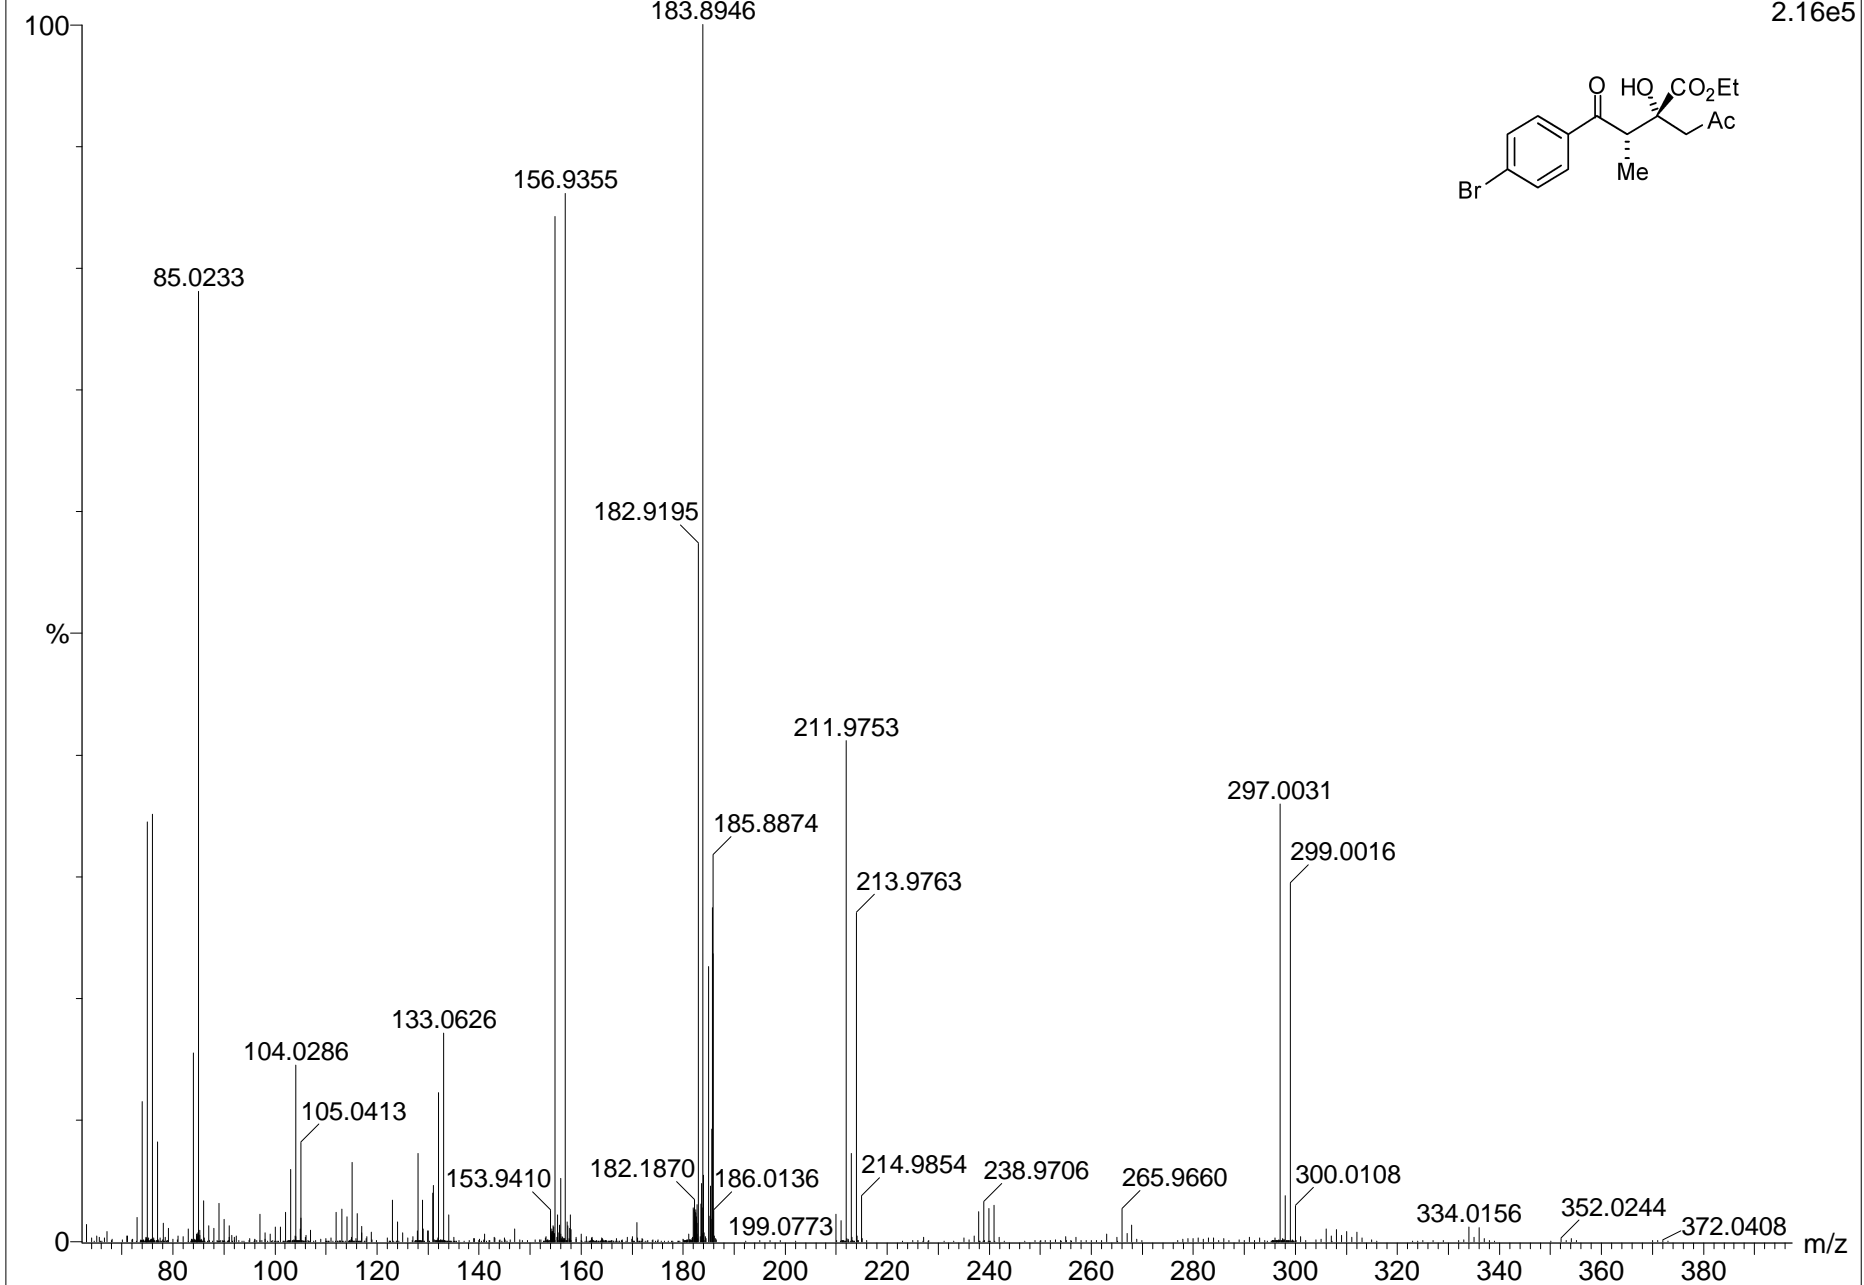

SAMPLE INFORMATION

|                   |                        |                     |              |
|-------------------|------------------------|---------------------|--------------|
| Sample Name:      | YJ-1                   | Acquired By:        | System       |
| Sample Type:      | Unknown                | Sample Set Name:    |              |
| Vial:             | 1                      | Acq. Method Set:    | Test         |
| Injection #:      | 2                      | Processing Method:  | 1            |
| Injection Volume: | 10.00 ul               | Channel Name:       | 254.0nm      |
| Run Time:         | 35.0 Minutes           | Proc. Chnl. Descr.: | PDA 254.0 nm |
| Date Acquired:    | 2008-3-27 14:27:47 CST |                     |              |
| Date Processed:   | 2008-3-27 15:01:44 CST |                     |              |

Auto-Scaled Chromatogram

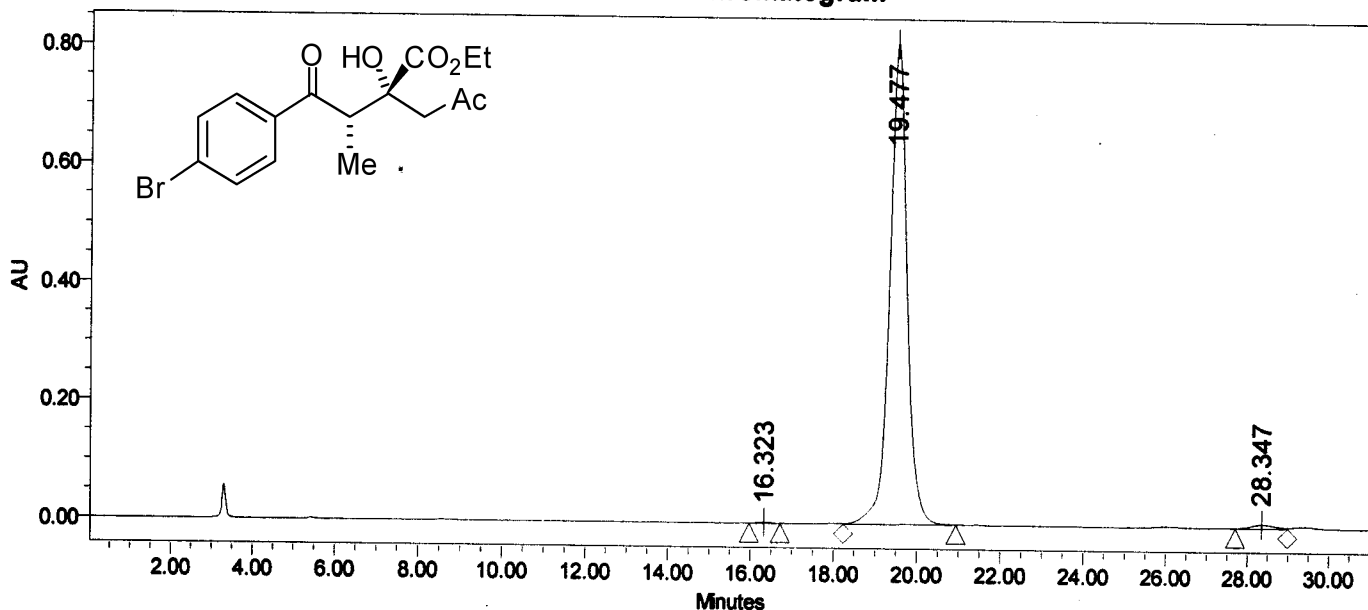

Peak Results

| Name | RT     | Height | Area     | % Area |
|------|--------|--------|----------|--------|
| 1    | 16.323 | 1600   | 33517    | 0.14   |
| 2    | 19.477 | 812438 | 23467069 | 98.77  |
| 3    | 28.347 | 6500   | 258273   | 1.09   |

ee 97.8%

## SAMPLE INFORMATION

|                   |                        |                     |              |
|-------------------|------------------------|---------------------|--------------|
| Sample Name:      | YJ-1-rac               | Acquired By:        | System       |
| Sample Type:      | Unknown                | Sample Set Name:    |              |
| Vial:             | 1                      | Acq. Method Set:    | Test         |
| Injection #:      | 1                      | Processing Method:  | 1            |
| Injection Volume: | 10.00 ul               | Channel Name:       | 254.0nm      |
| Run Time:         | 40.0 Minutes           | Proc. Chnl. Descr.: | PDA 254.0 nm |
| Date Acquired:    | 2008-3-27 13:06:28 CST |                     |              |
| Date Processed:   | 2008-3-27 13:51:22 CST |                     |              |

## Auto-Scaled Chromatogram

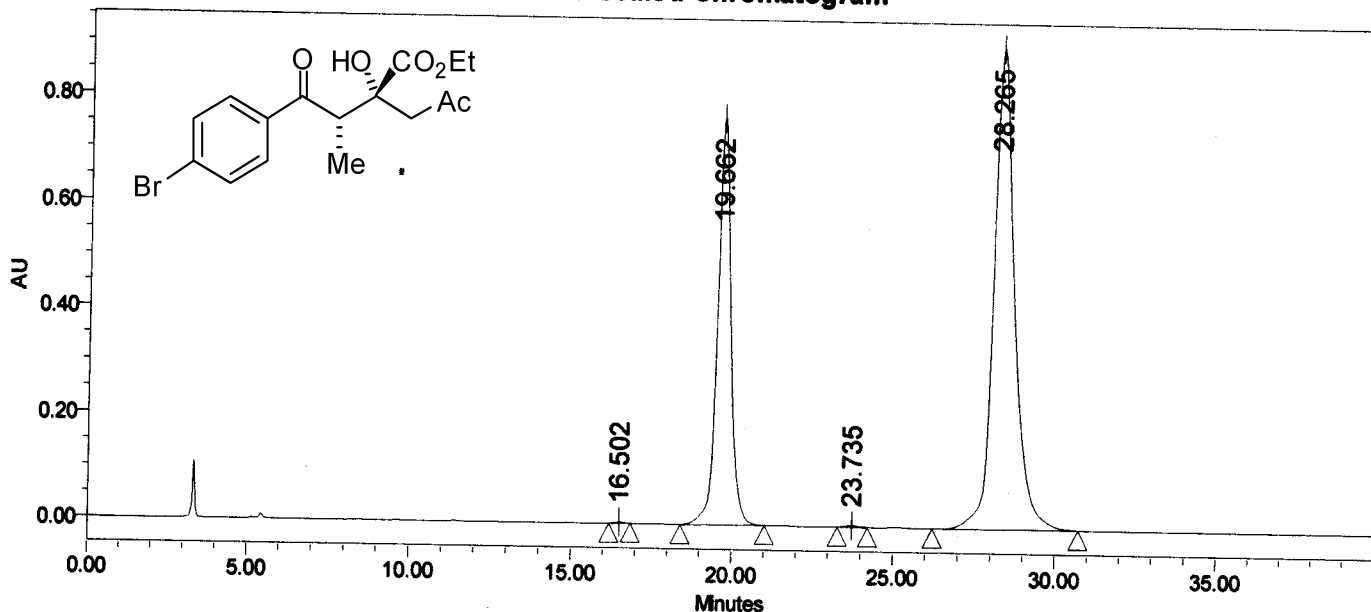

## Peak Results

| Name | RT     | Height | Area     | % Area |
|------|--------|--------|----------|--------|
| 1    | 16.502 | 2220   | 40824    | 0.07   |
| 2    | 19.662 | 766961 | 22143247 | 35.33  |
| 3    | 23.735 | 2845   | 77624    | 0.12   |
| 4    | 28.265 | 906900 | 40411381 | 64.48  |

Reported by User: System

Report Method: sz2

Report Method ID 1644

Page: 1 of 2

Project Name: sz2

Date Printed:

2008-3-27

14:53:09 PRC

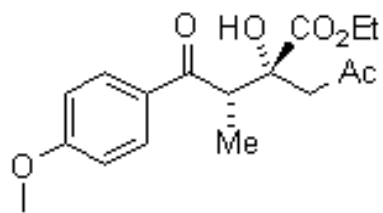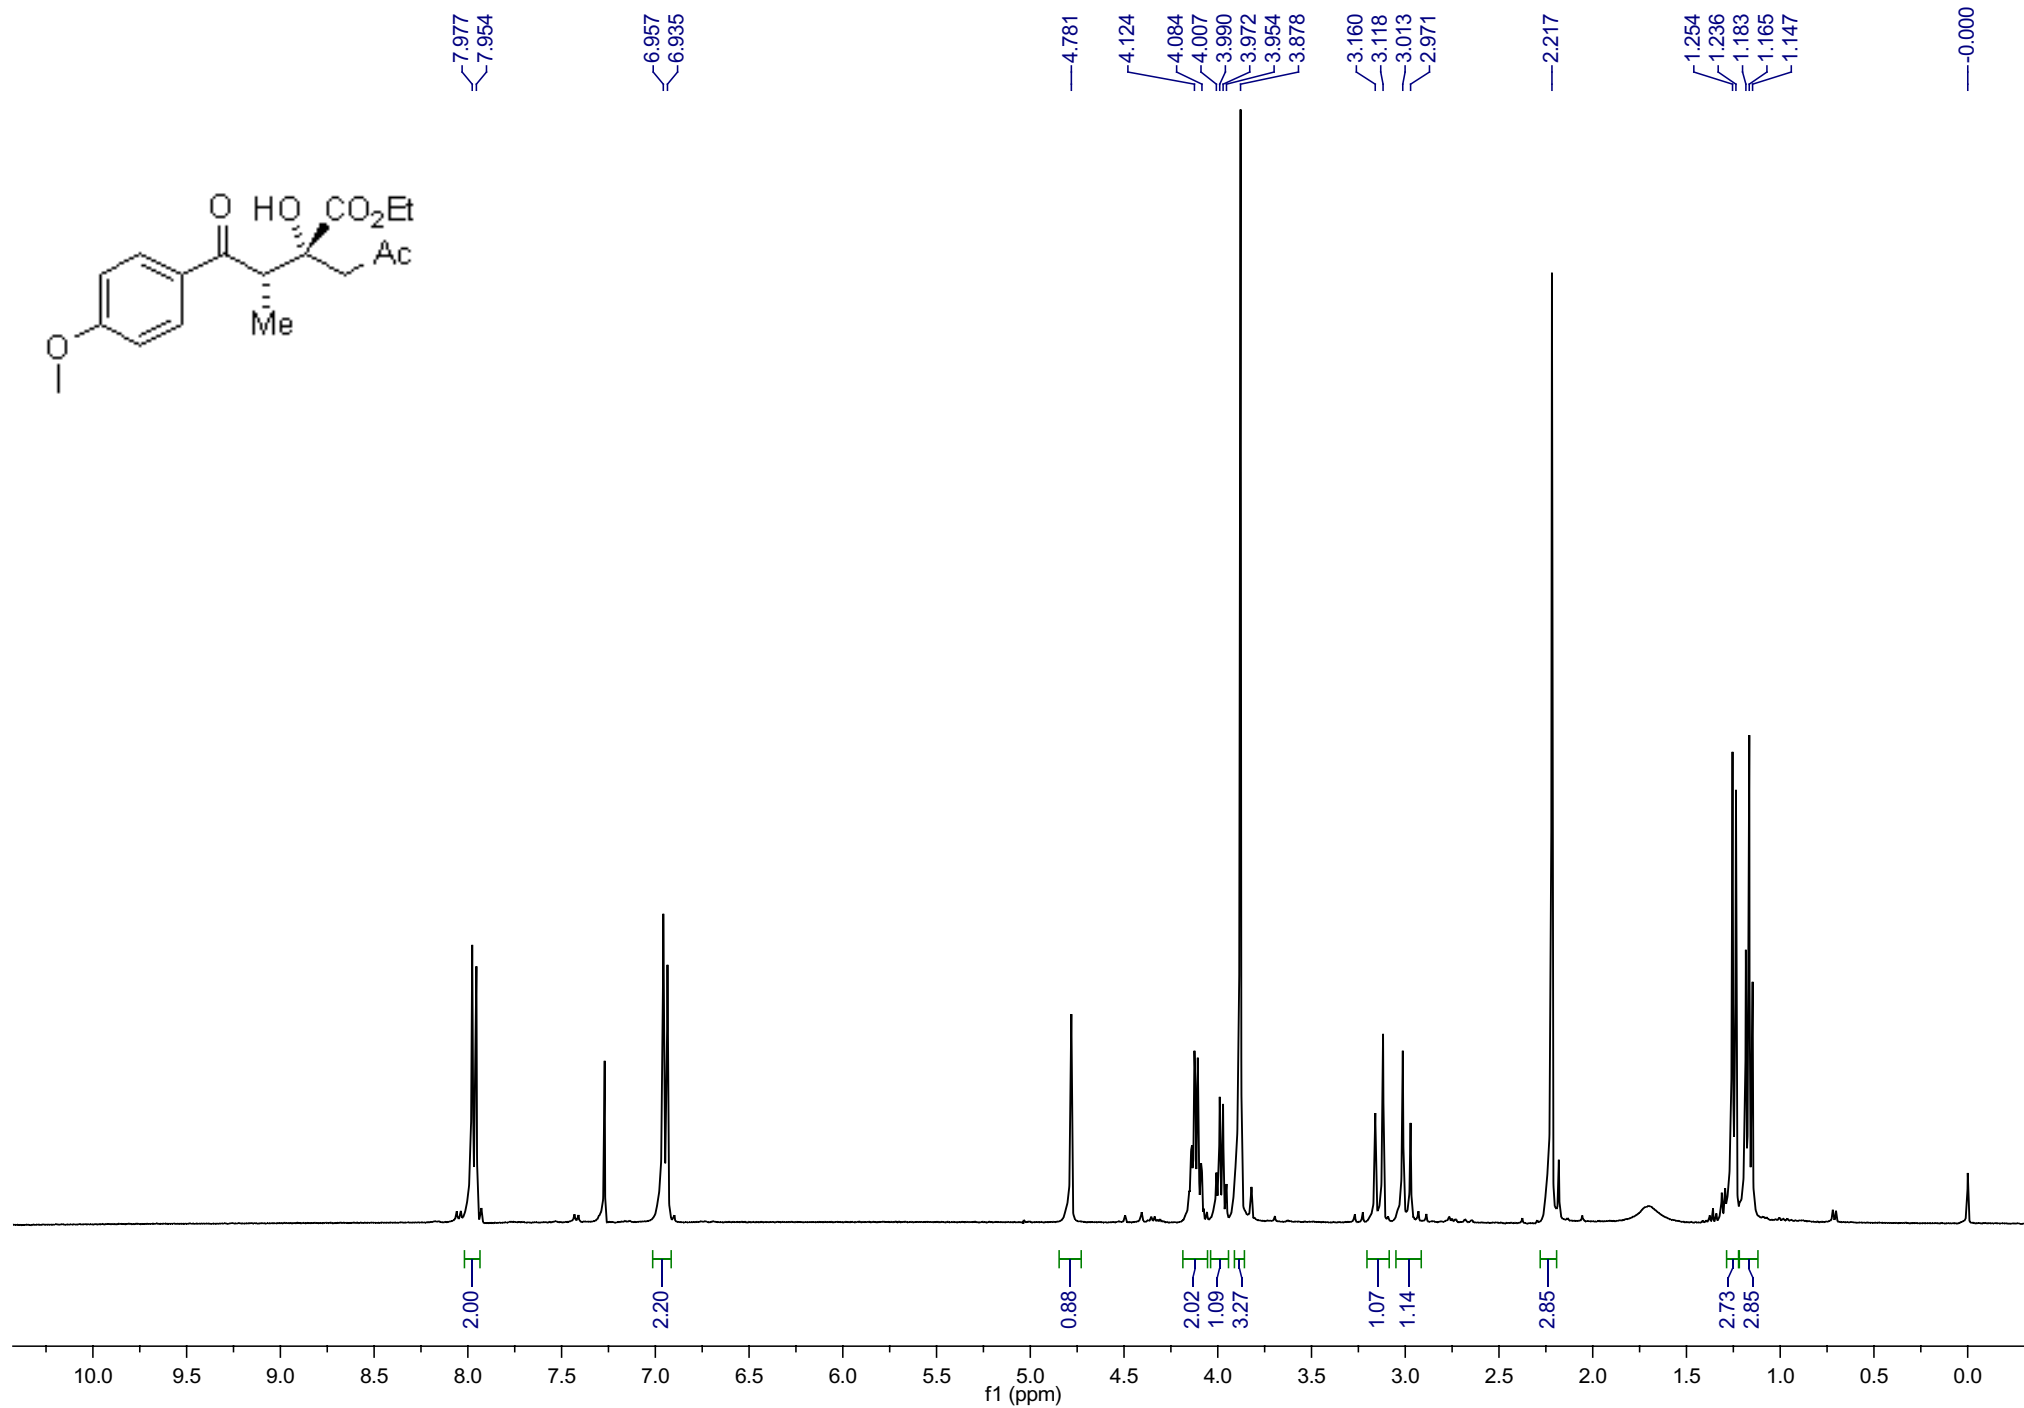

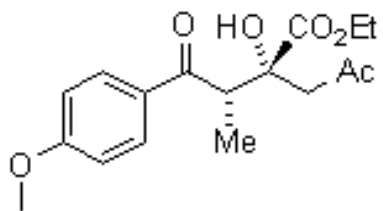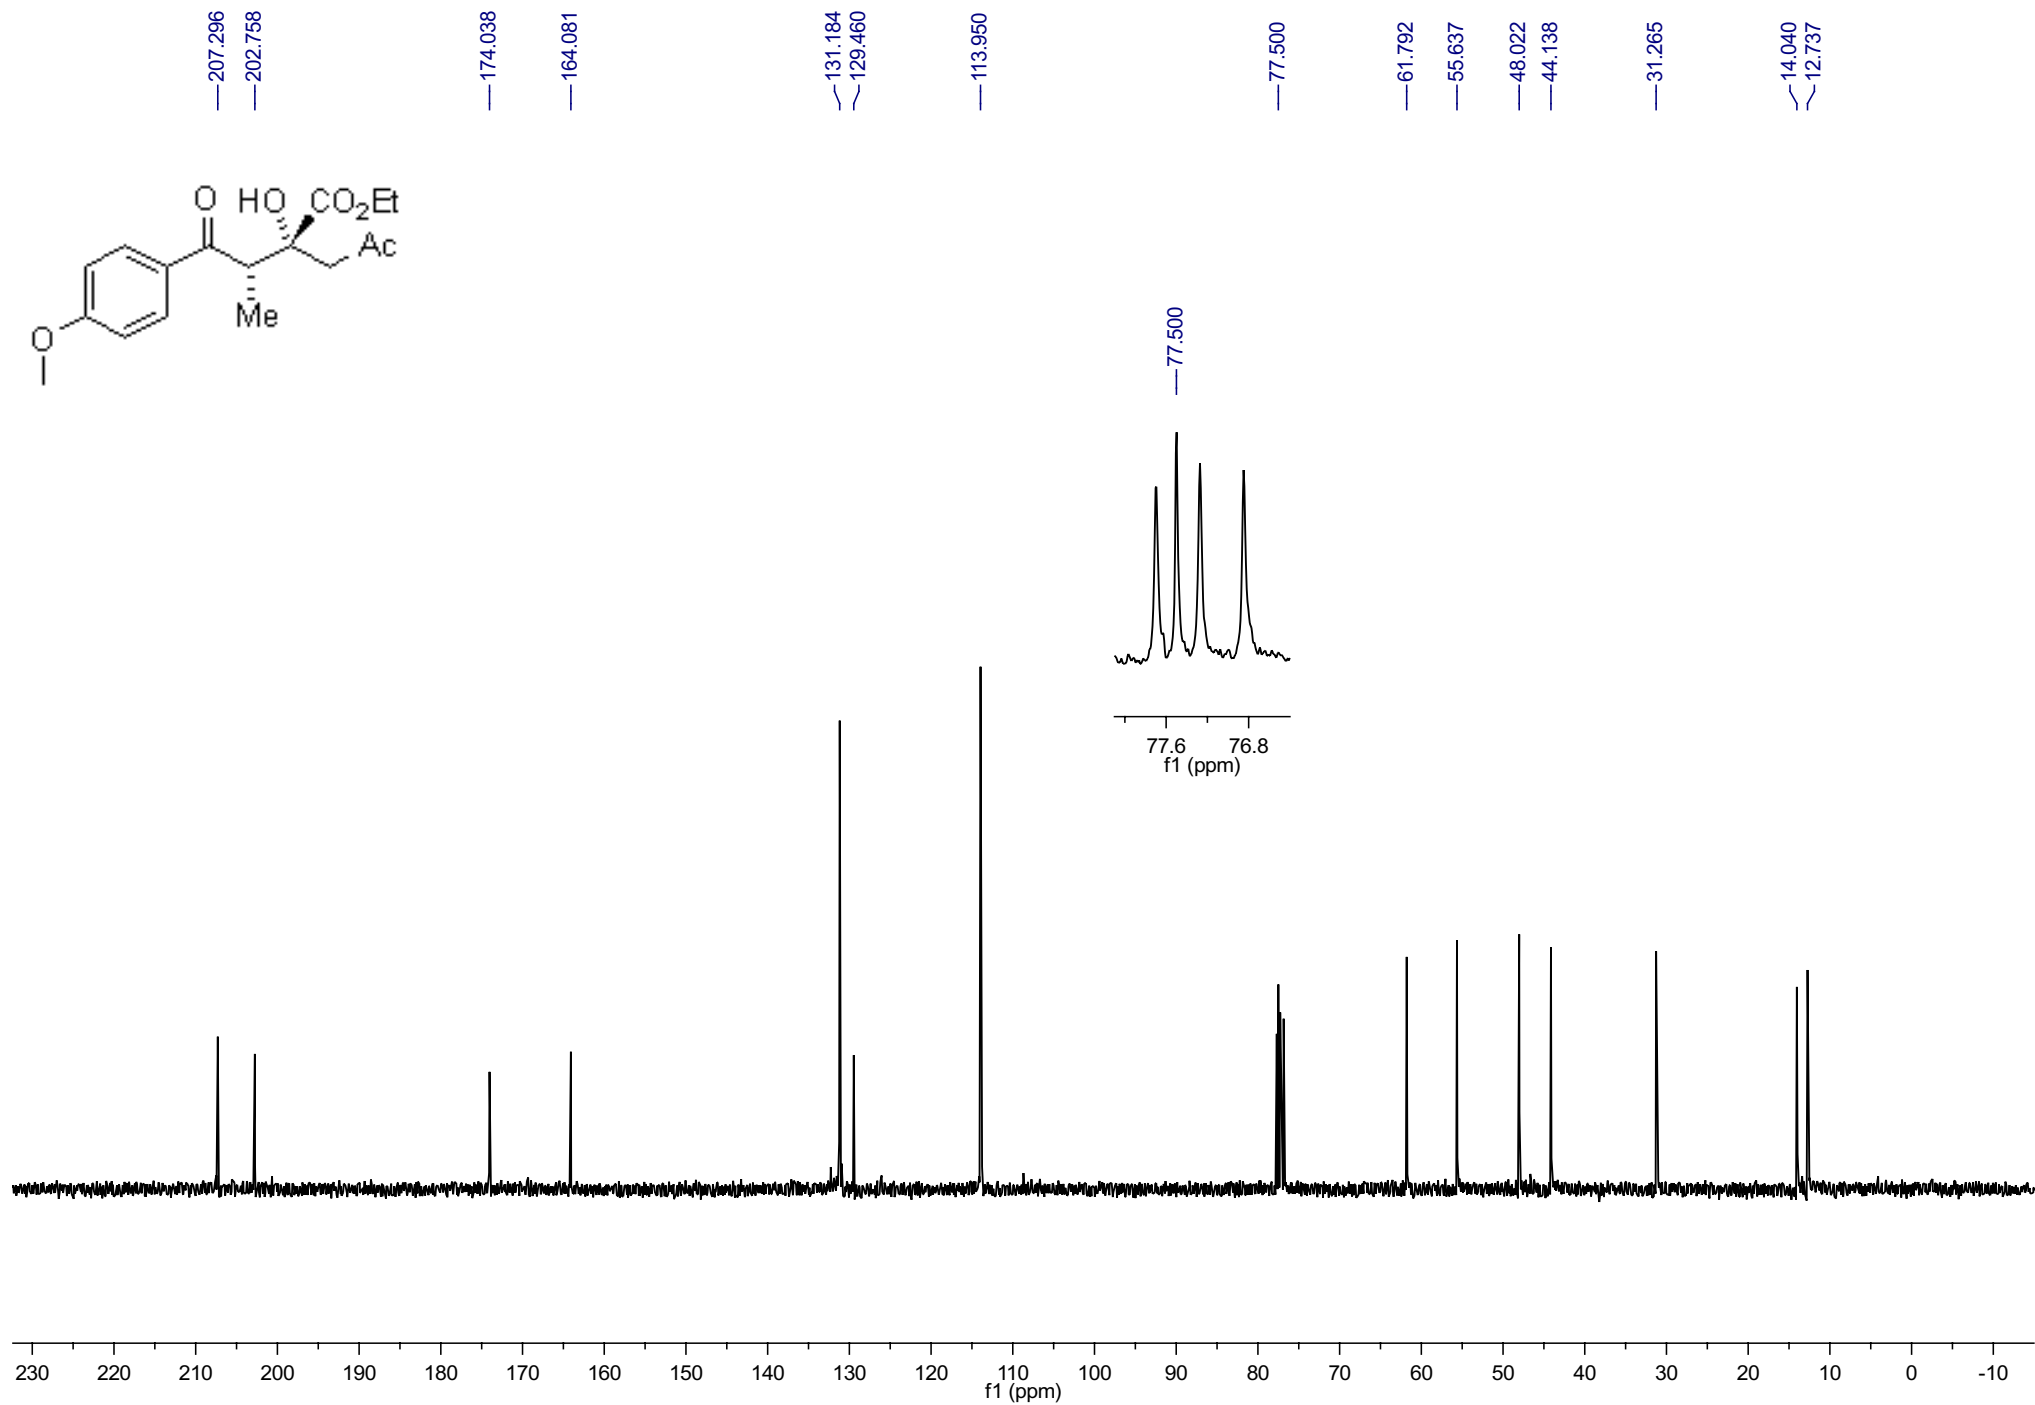

SUDA-TOFMS-EI-080703

yj-3 138 (2.299) Cm (134:138-(166:168+93:96))

TOF MS EI+  
1.85e5

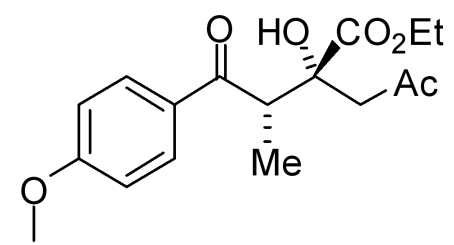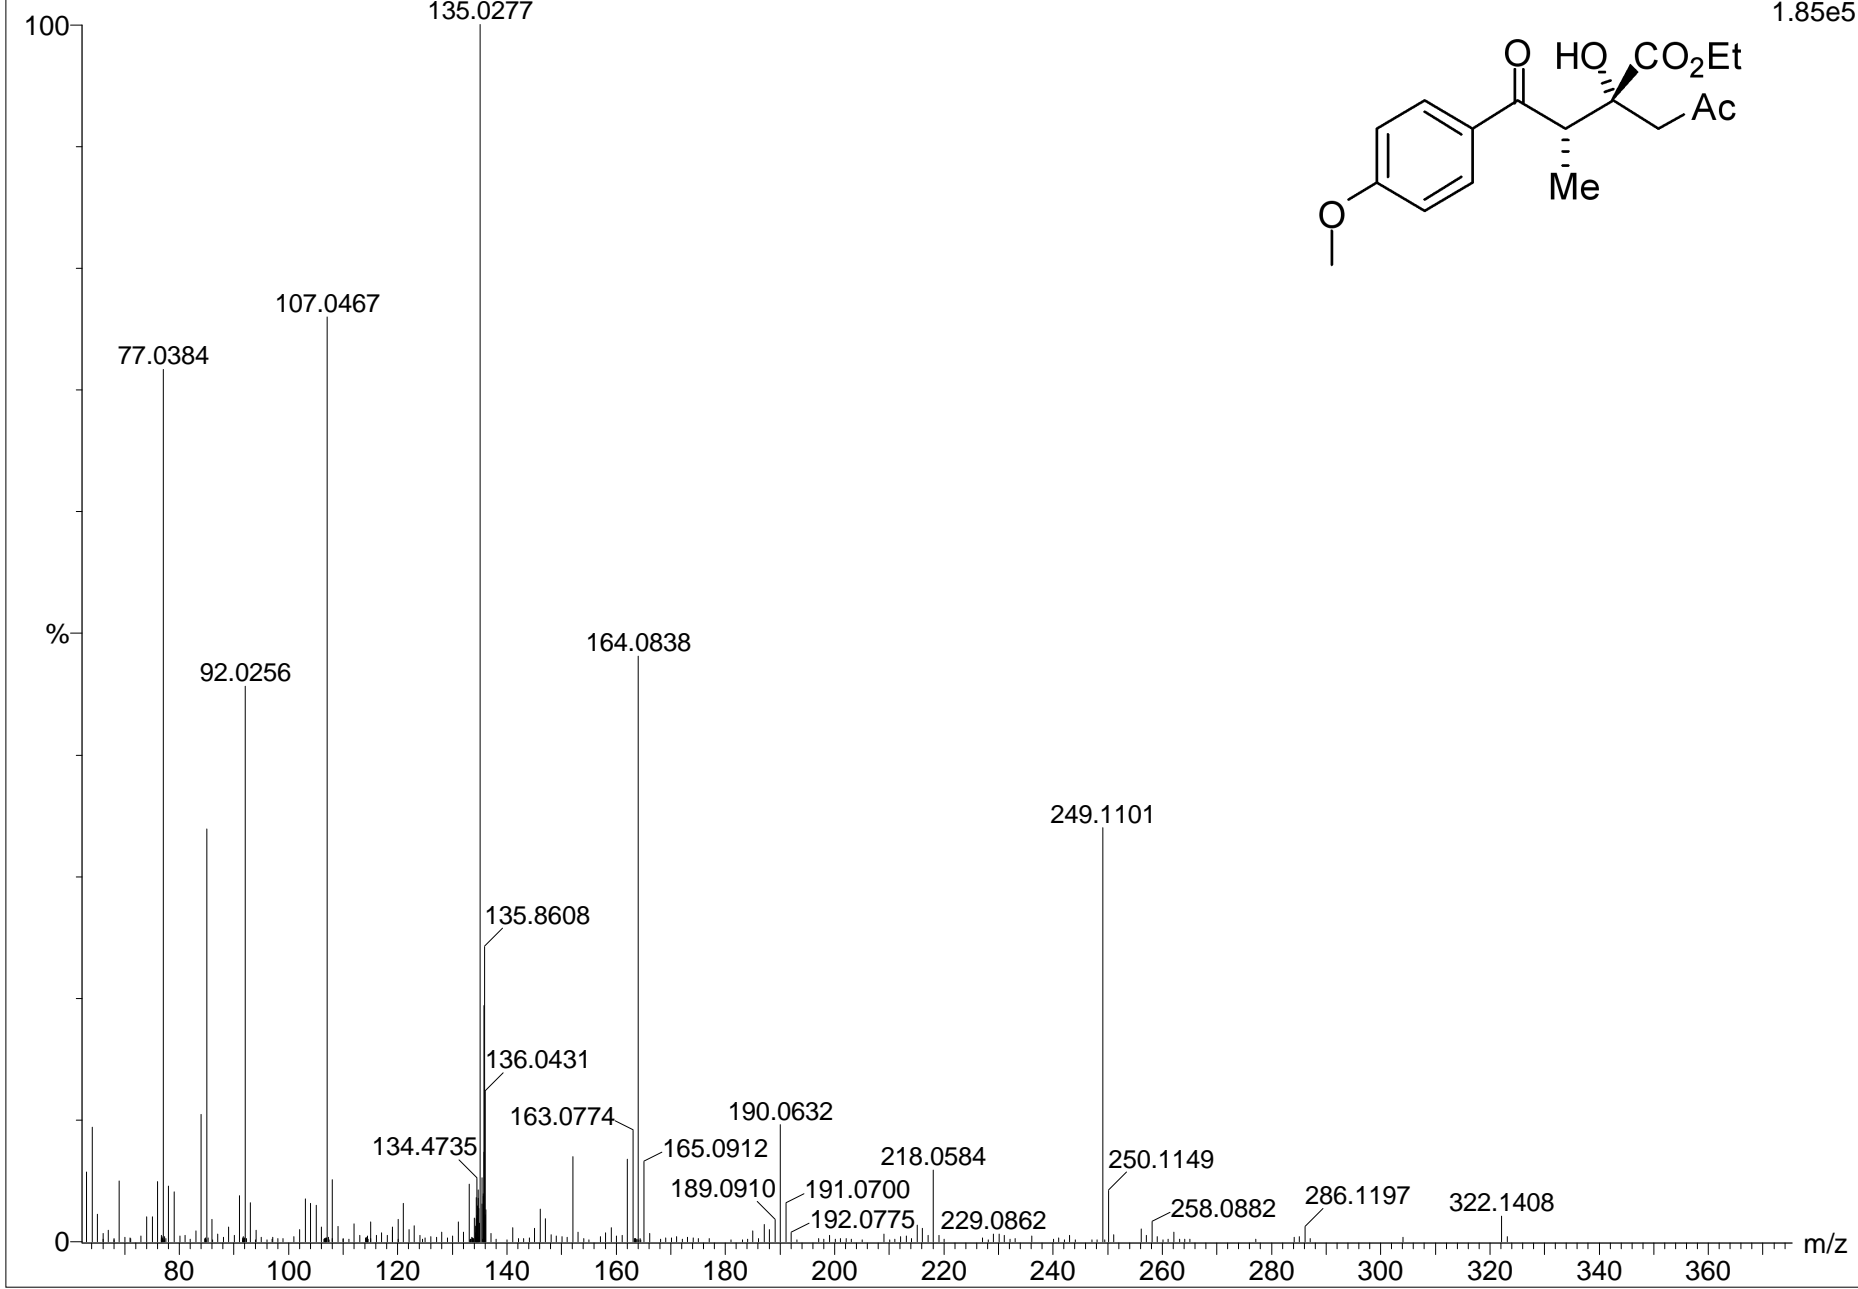

SAMPLE INFORMATION

|                   |                        |                     |              |
|-------------------|------------------------|---------------------|--------------|
| Sample Name:      | yj-2                   | Acquired By:        | System       |
| Sample Type:      | Unknown                | Sample Set Name:    |              |
| Vial:             | 1                      | Acq. Method Set:    | Test         |
| Injection #:      | 2                      | Processing Method:  | 1            |
| Injection Volume: | 10.00 ul               | Channel Name:       | 254.0nm      |
| Run Time:         | 80.0 Minutes           | Proc. Chnl. Descr.: | PDA 254.0 nm |
| Date Acquired:    | 2008-4-11 16:24:52 CST |                     |              |
| Date Processed:   | 2008-4-11 18:08:05 CST |                     |              |

Auto-Scaled Chromatogram

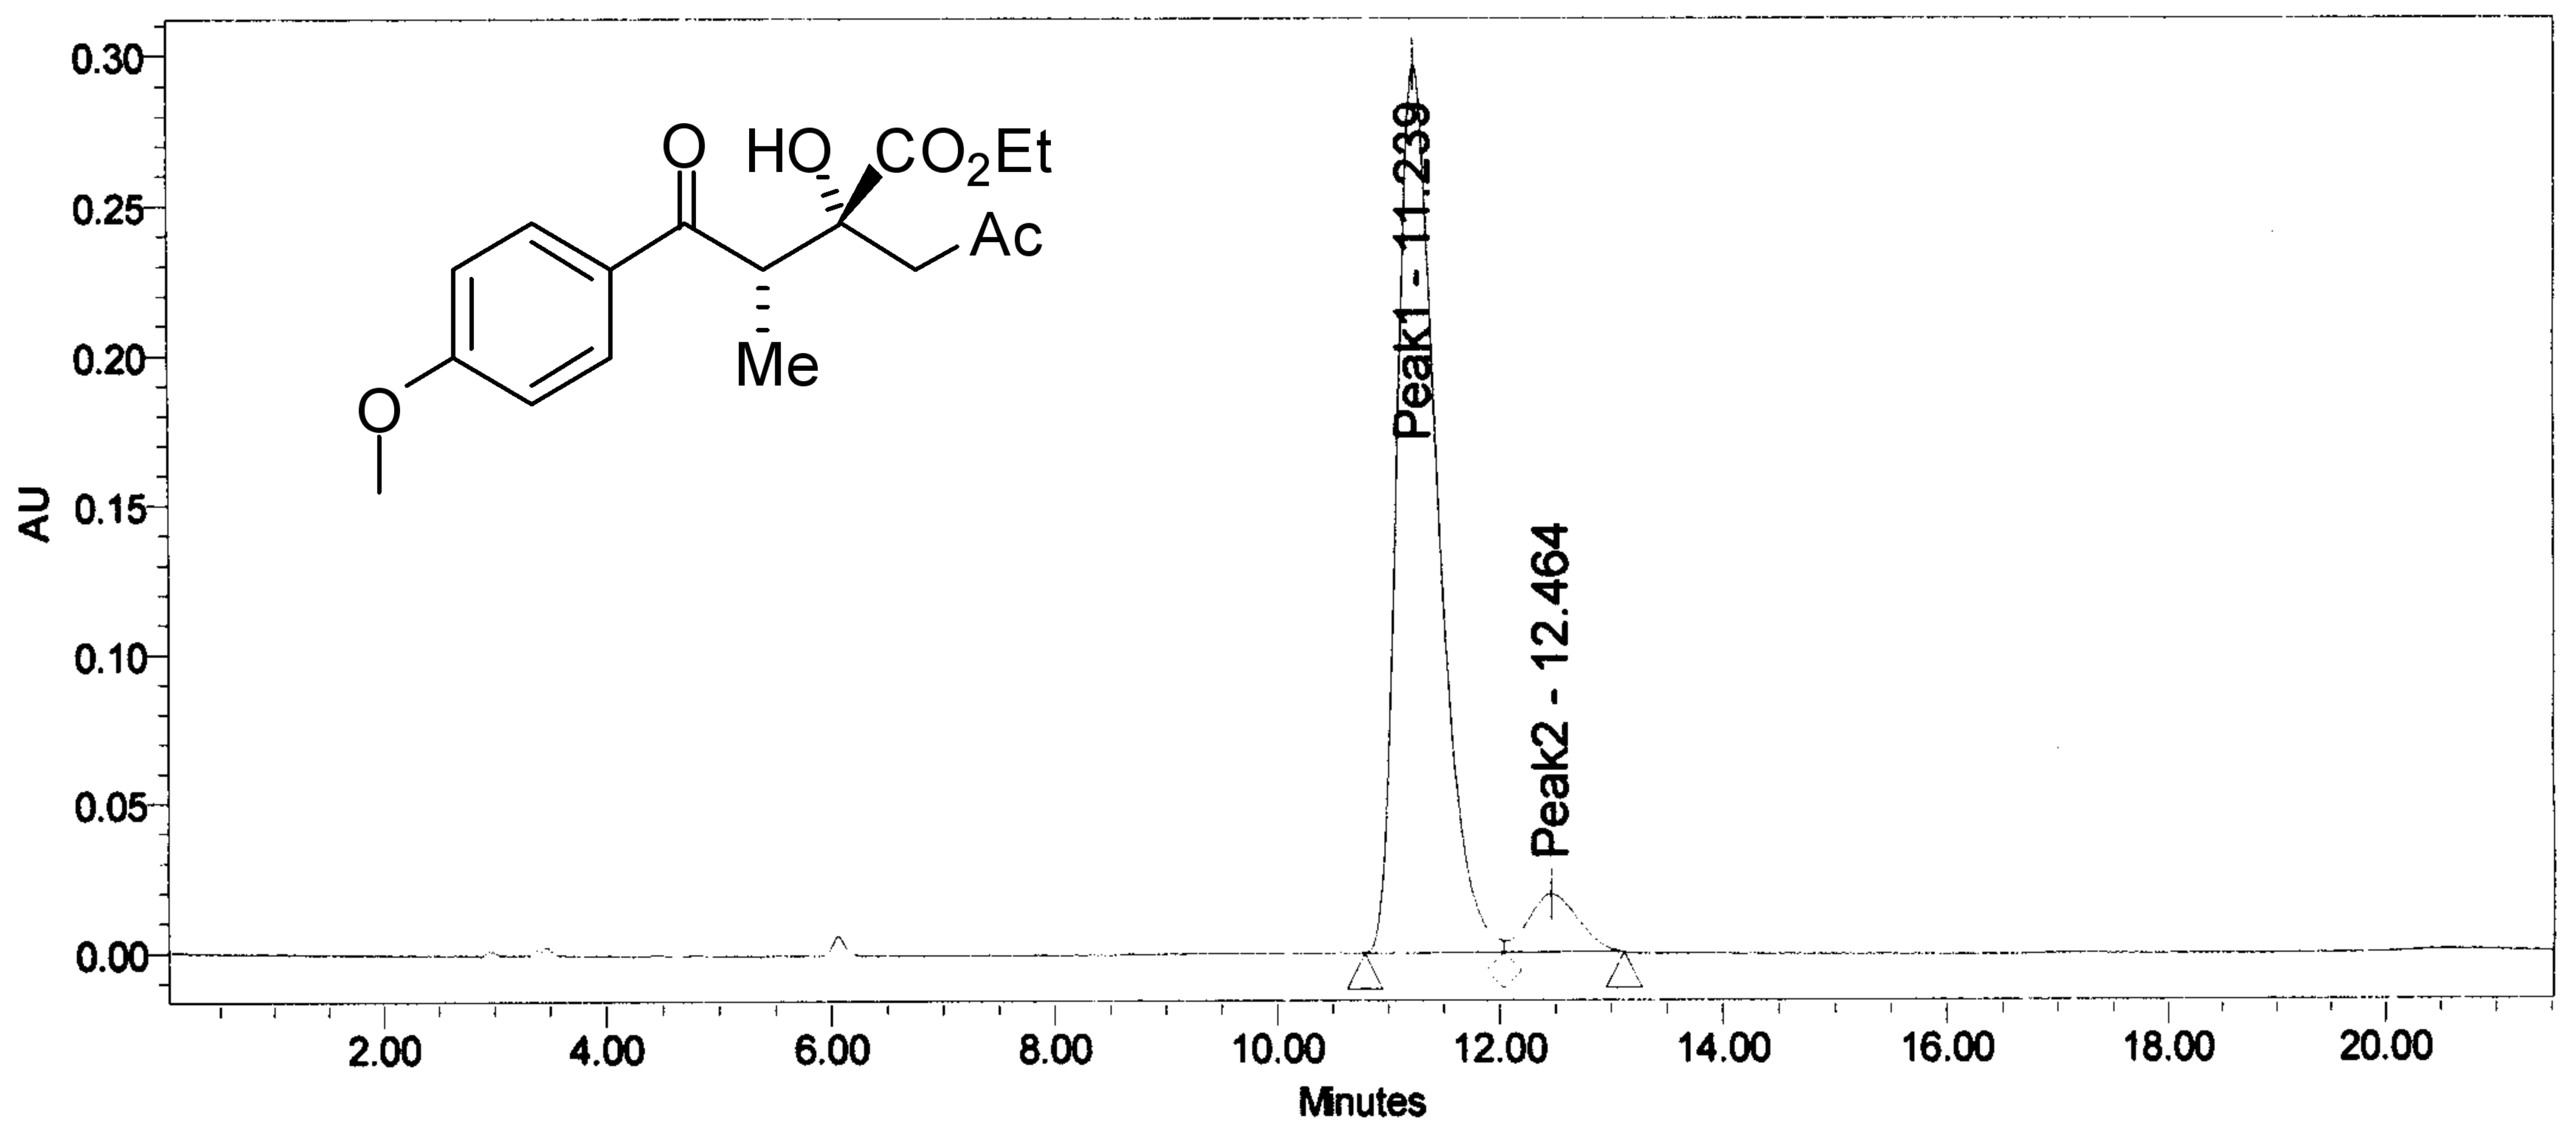

Peak Results

|   | Name  | RT     | Height | Area    | % Area |
|---|-------|--------|--------|---------|--------|
| 1 | Peak1 | 11.239 | 297665 | 7522513 | 92.58  |
| 2 | Peak2 | 12.464 | 19269  | 603076  | 7.42   |

*ee 85.16%*

*dr > 99%*

*p-tilde-ph-*



## SAMPLE INFORMATION

|                   |                        |                     |              |
|-------------------|------------------------|---------------------|--------------|
| Sample Name:      | yj-2-rac               | Acquired By:        | System       |
| Sample Type:      | Unknown                | Sample Set Name:    |              |
| Vial:             | 1                      | Acq. Method Set:    | Test         |
| Injection #:      | 1                      | Processing Method:  | 2            |
| Injection Volume: | 10.00 ul               | Channel Name:       | 254.0nm      |
| Run Time:         | 30.0 Minutes           | Proc. Chnl. Descr.: | PDA 254.0 nm |
| Date Acquired:    | 2008-4-11 17:39:07 CST |                     |              |
| Date Processed:   | 2008-4-11 18:05:48 CST |                     |              |

## Auto-Scaled Chromatogram

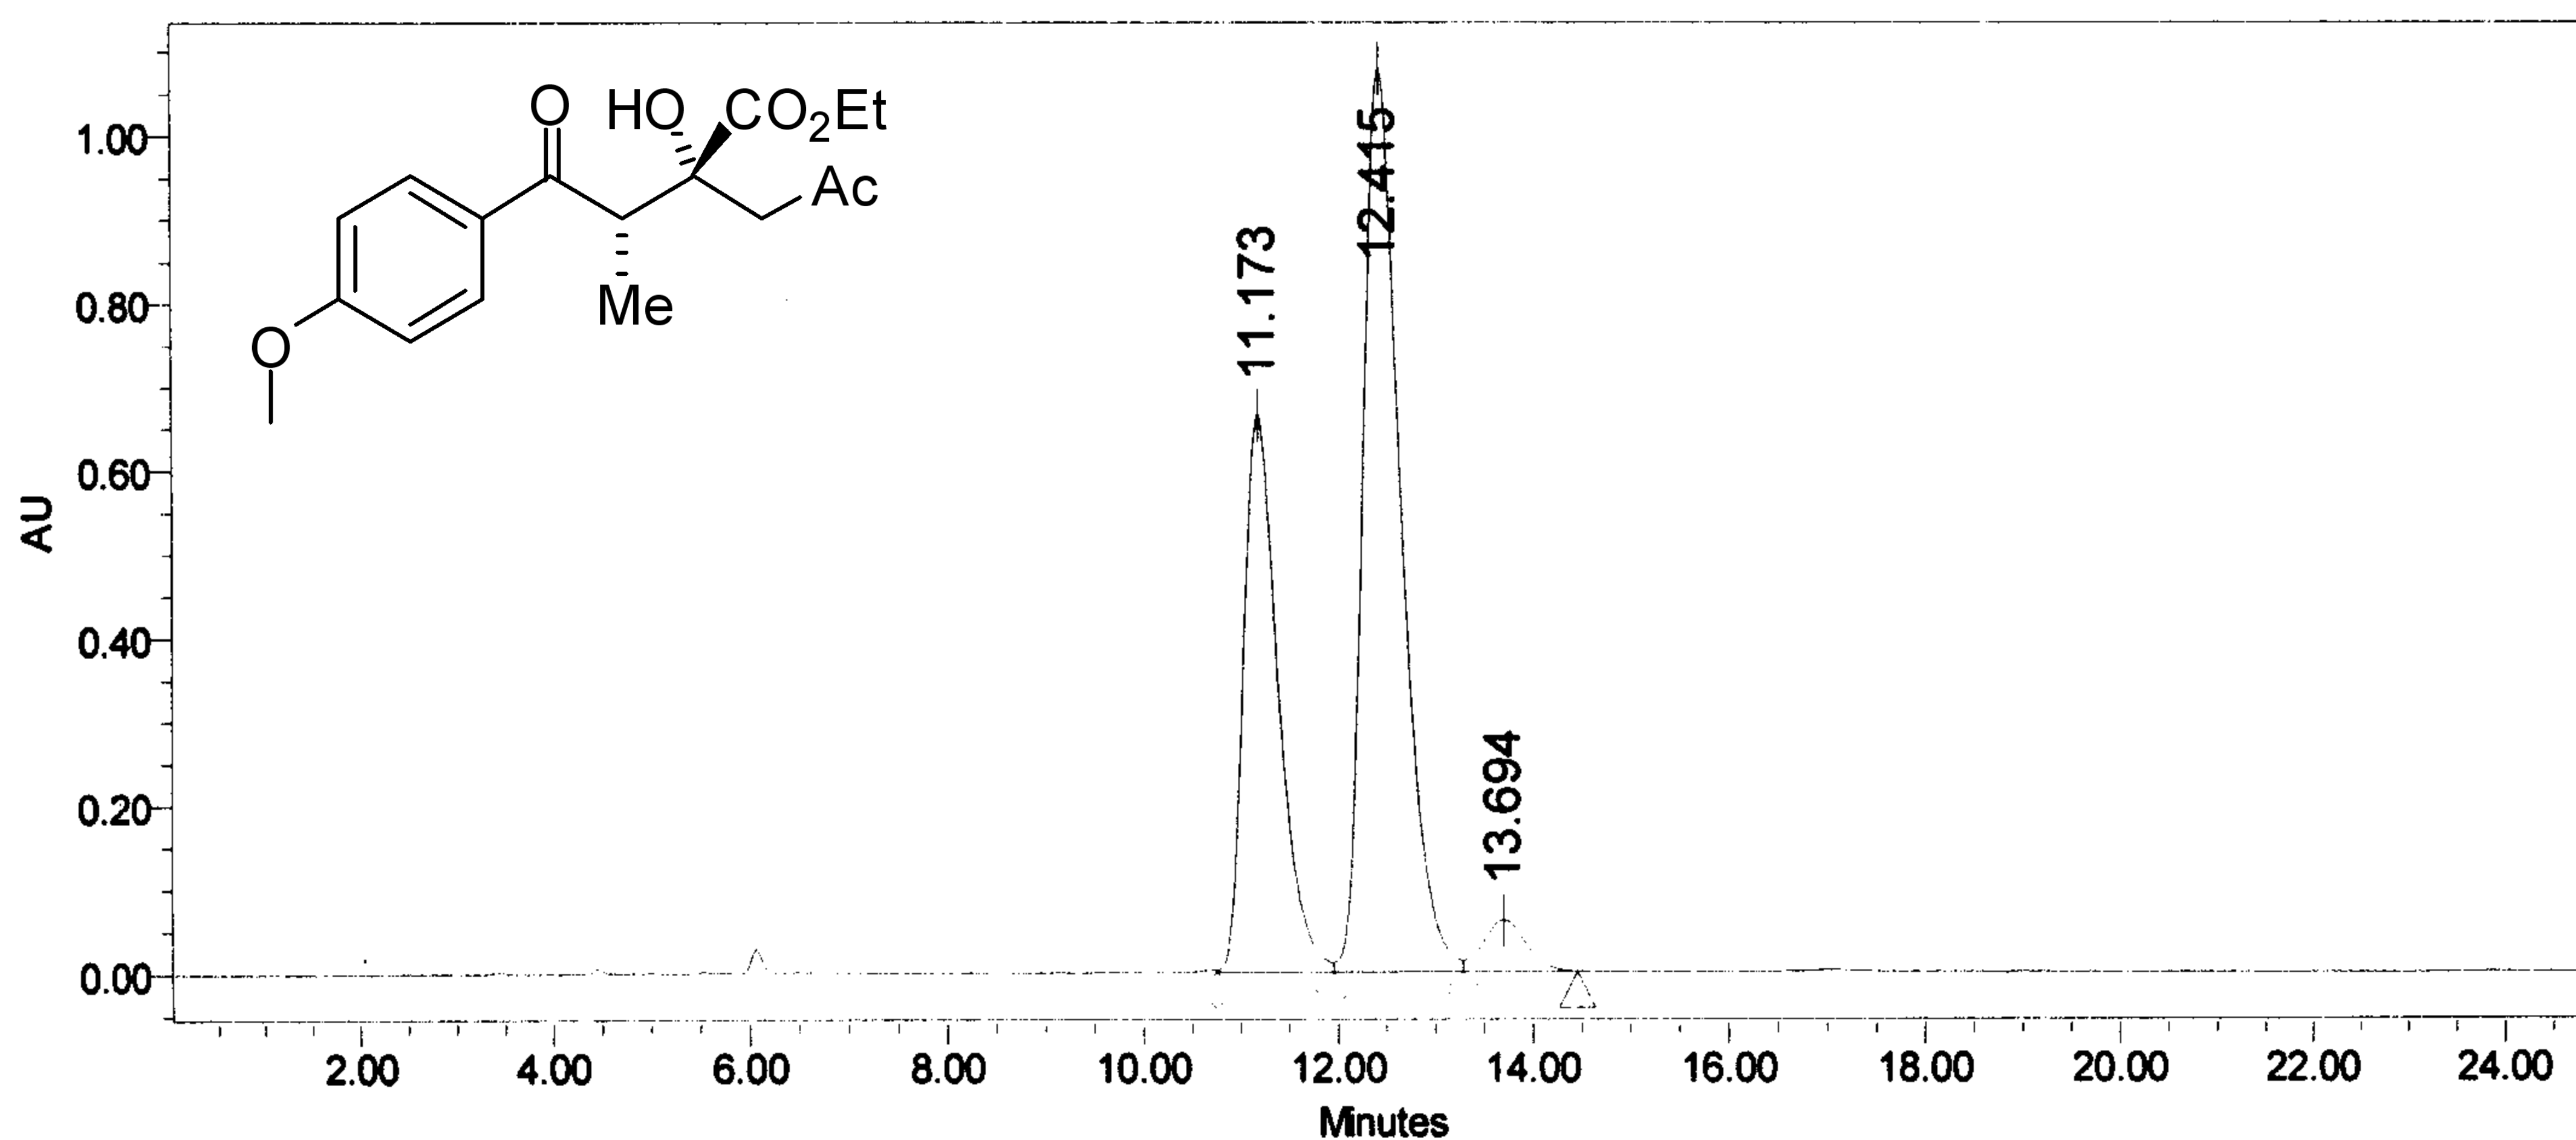

## Peak Results

| Name | RT     | Height  | Area     | % Area |
|------|--------|---------|----------|--------|
| 1    | 11.173 | 664877  | 16468495 | 34.71  |
| 2    | 12.415 | 1077359 | 29126824 | 61.39  |
| 3    | 13.694 | 60855   | 1850406  | 3.90   |

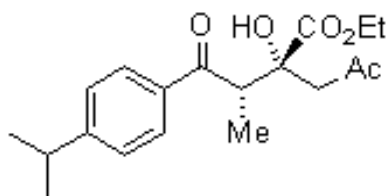

7.919  
7.898

7.333  
7.312

4.722

4.108

4.041

4.023

4.005

3.987

3.172

3.130

3.023

3.003

2.981

2.969

2.952

2.934

2.218

1.276

1.258

1.239

1.190

1.172

1.154

0.000

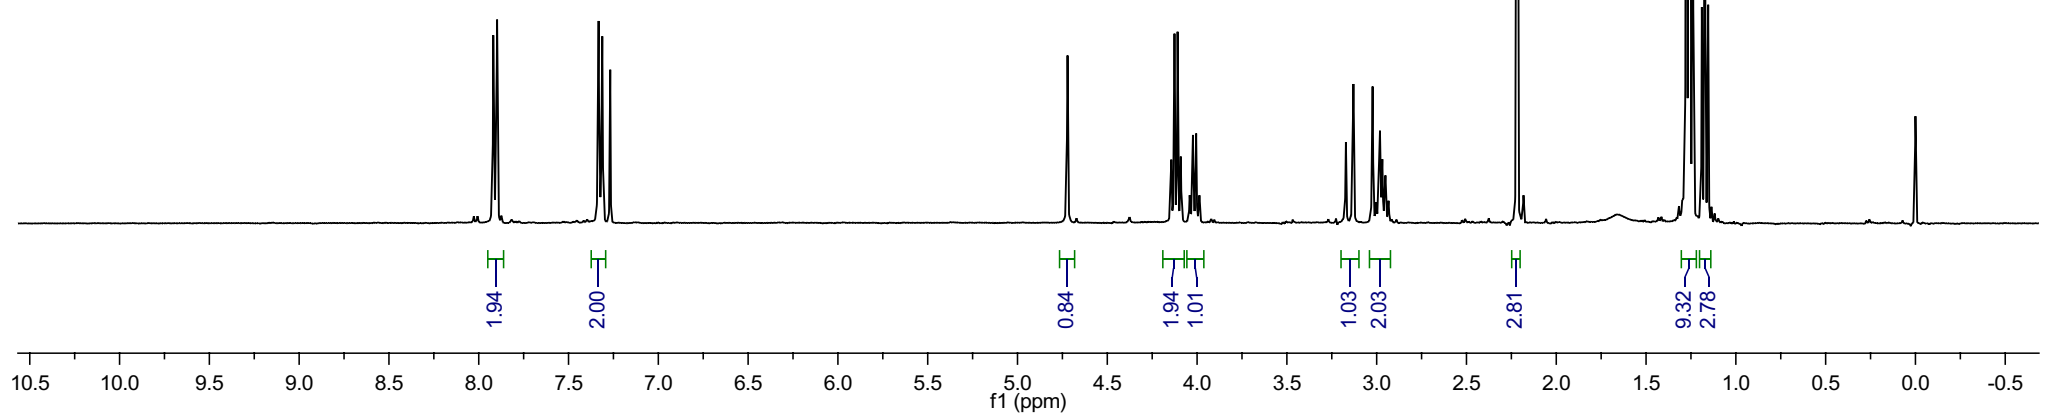

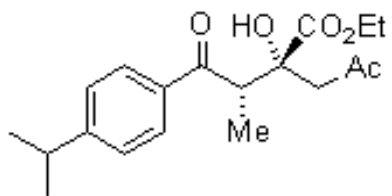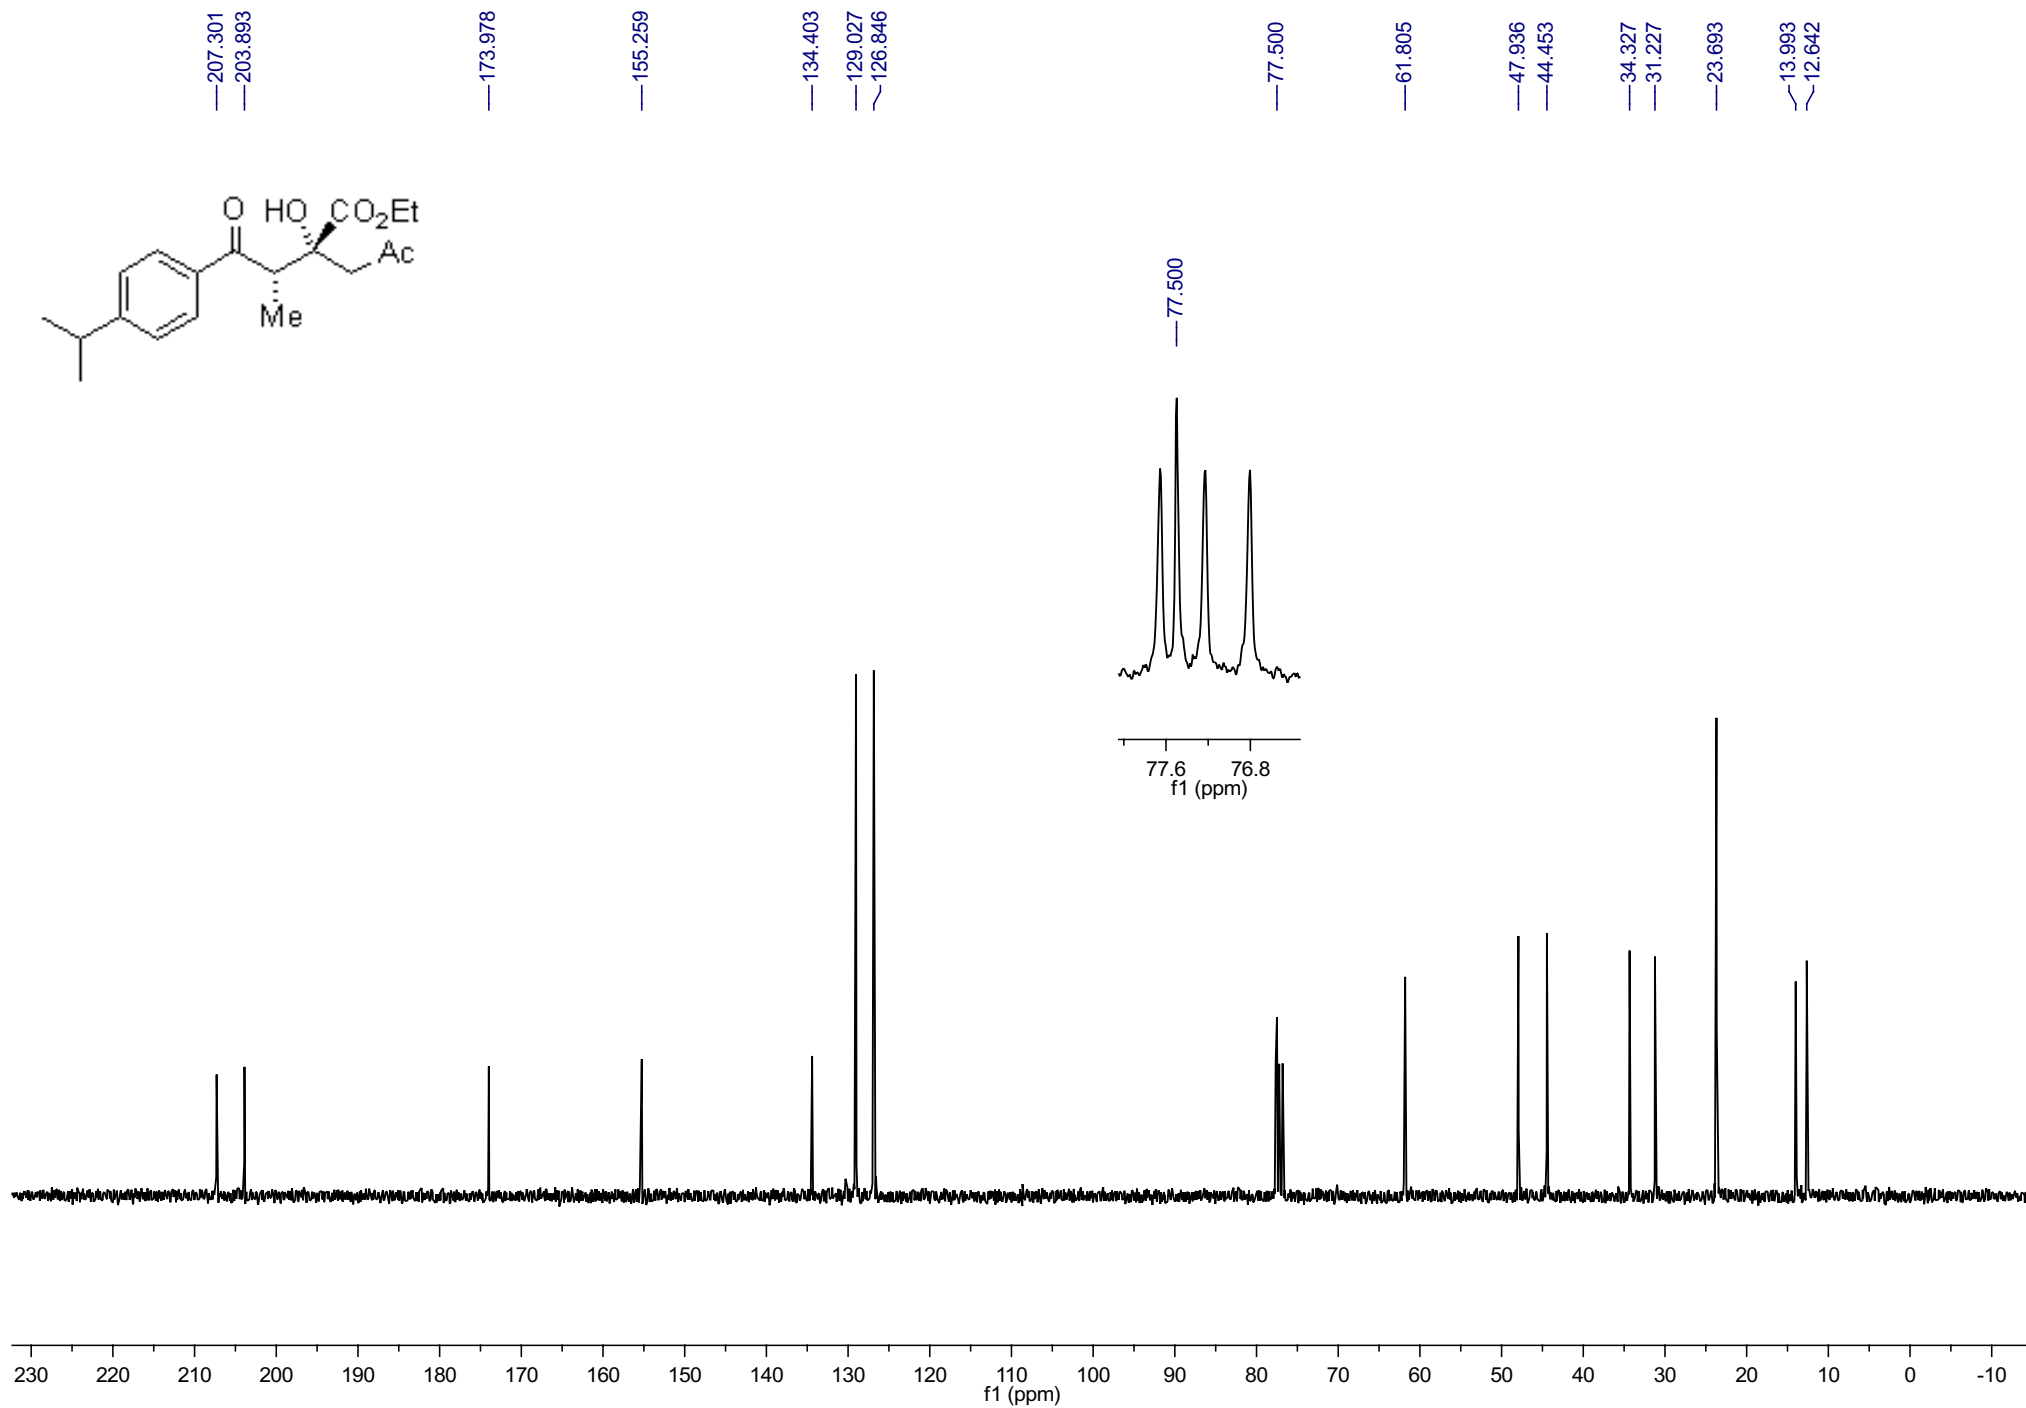

SUDA-TOFMS-EI-080704

yj-9 119 (1.982) Cm (116:119-(92:95+131:134))

TOF MS EI+  
1.24e5

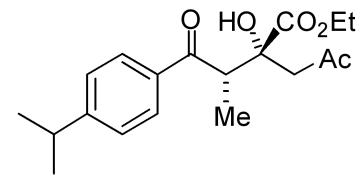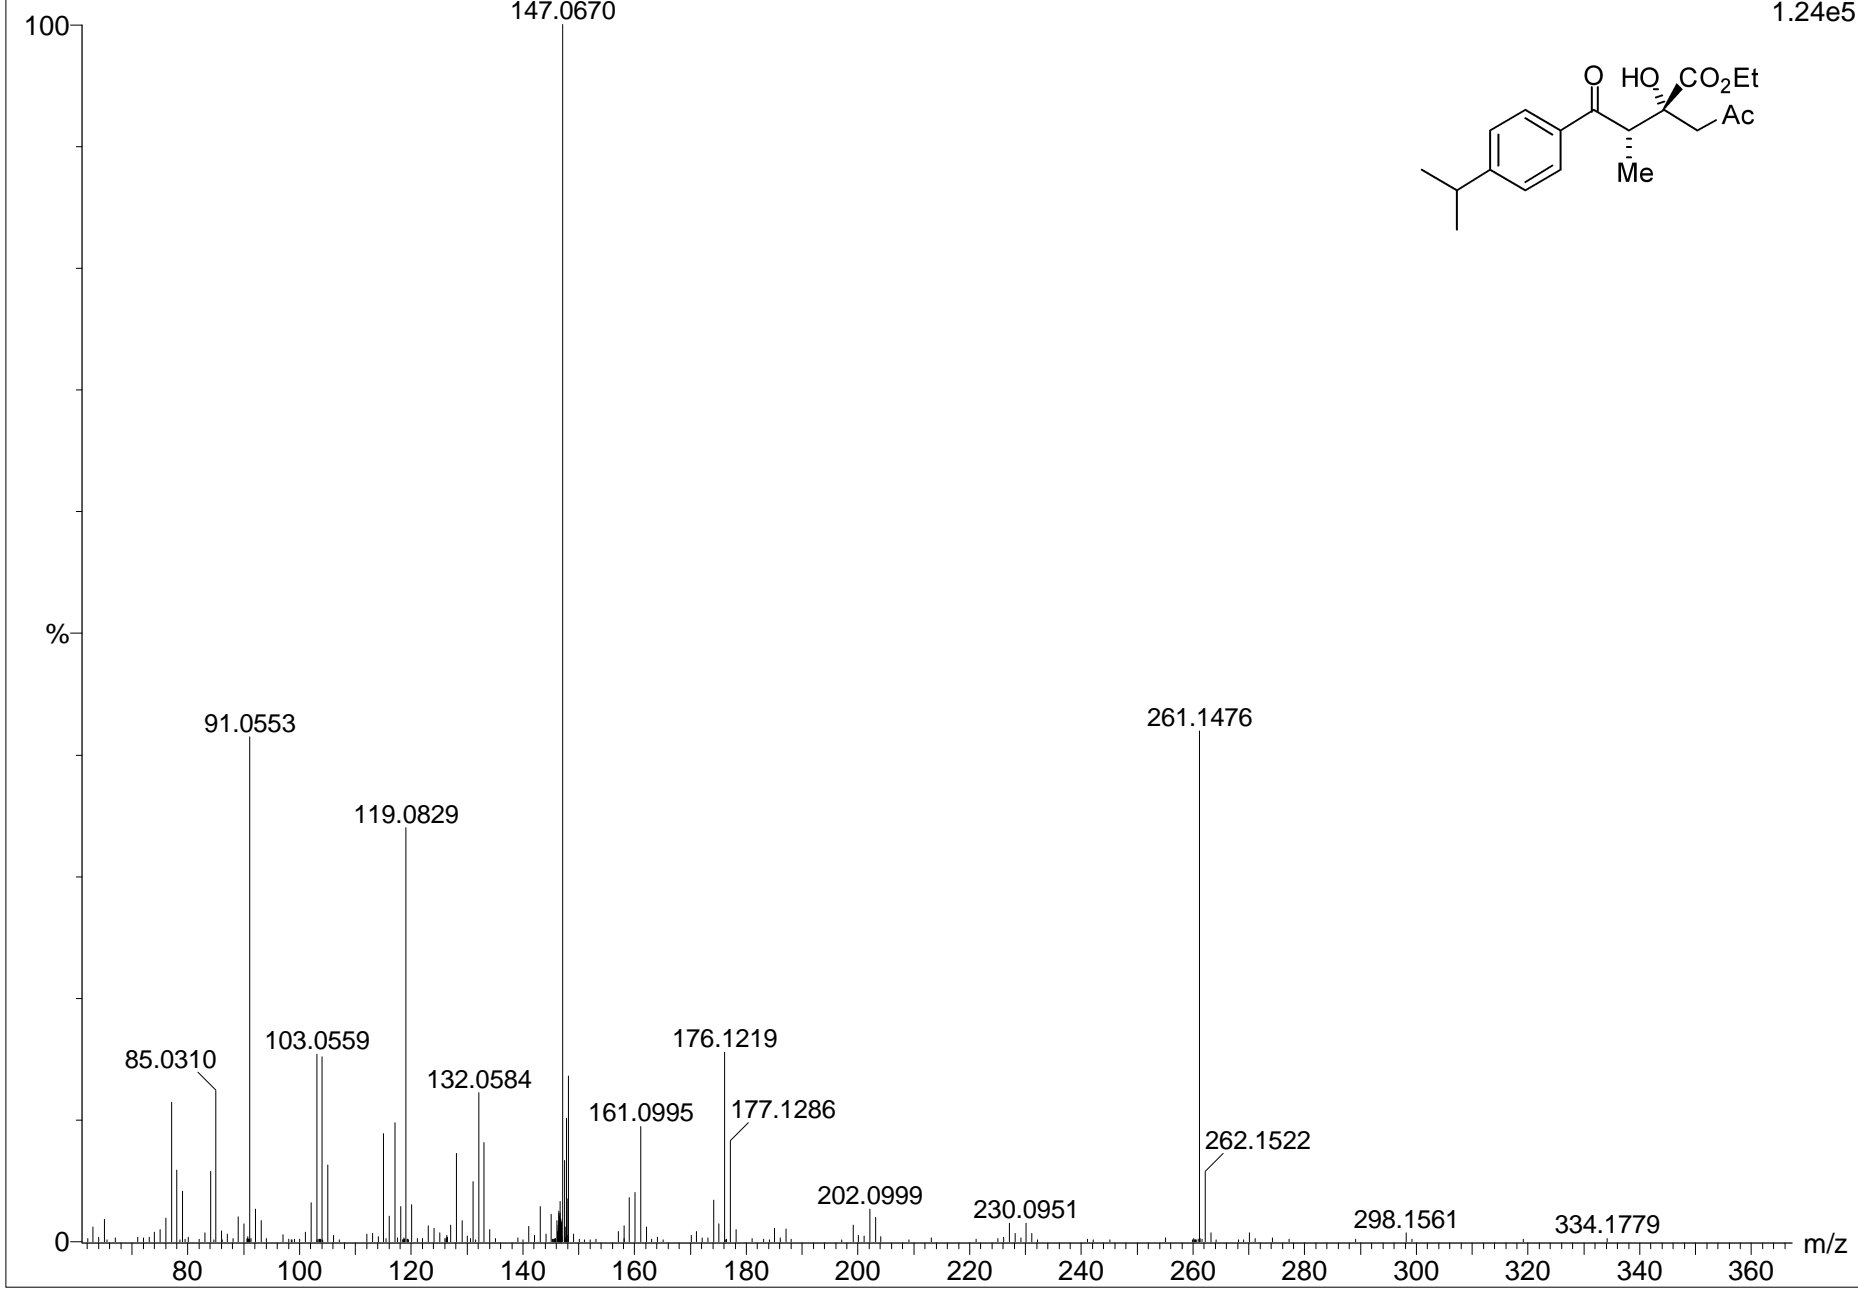

SAMPLE INFORMATION

|                   |                        |                     |              |
|-------------------|------------------------|---------------------|--------------|
| Sample Name:      | yj-2                   | Acquired By:        | System       |
| Sample Type:      | Unknown                | Sample Set Name:    |              |
| Vial:             | 1                      | Acq. Method Set:    | Untitled     |
| Injection #:      | 14                     | Processing Method:  | LC PQ        |
| Injection Volume: | 10.00 ul               | Channel Name:       | 254.0nm      |
| Run Time:         | 60.0 Minutes           | Proc. Chnl. Descr.: | PDA 254.0 nm |
| Date Acquired:    | 2008-4-30 14:39:49 CST |                     |              |
| Date Processed:   | 2008-4-30 14:58:10 CST |                     |              |

Auto-Scaled Chromatogram

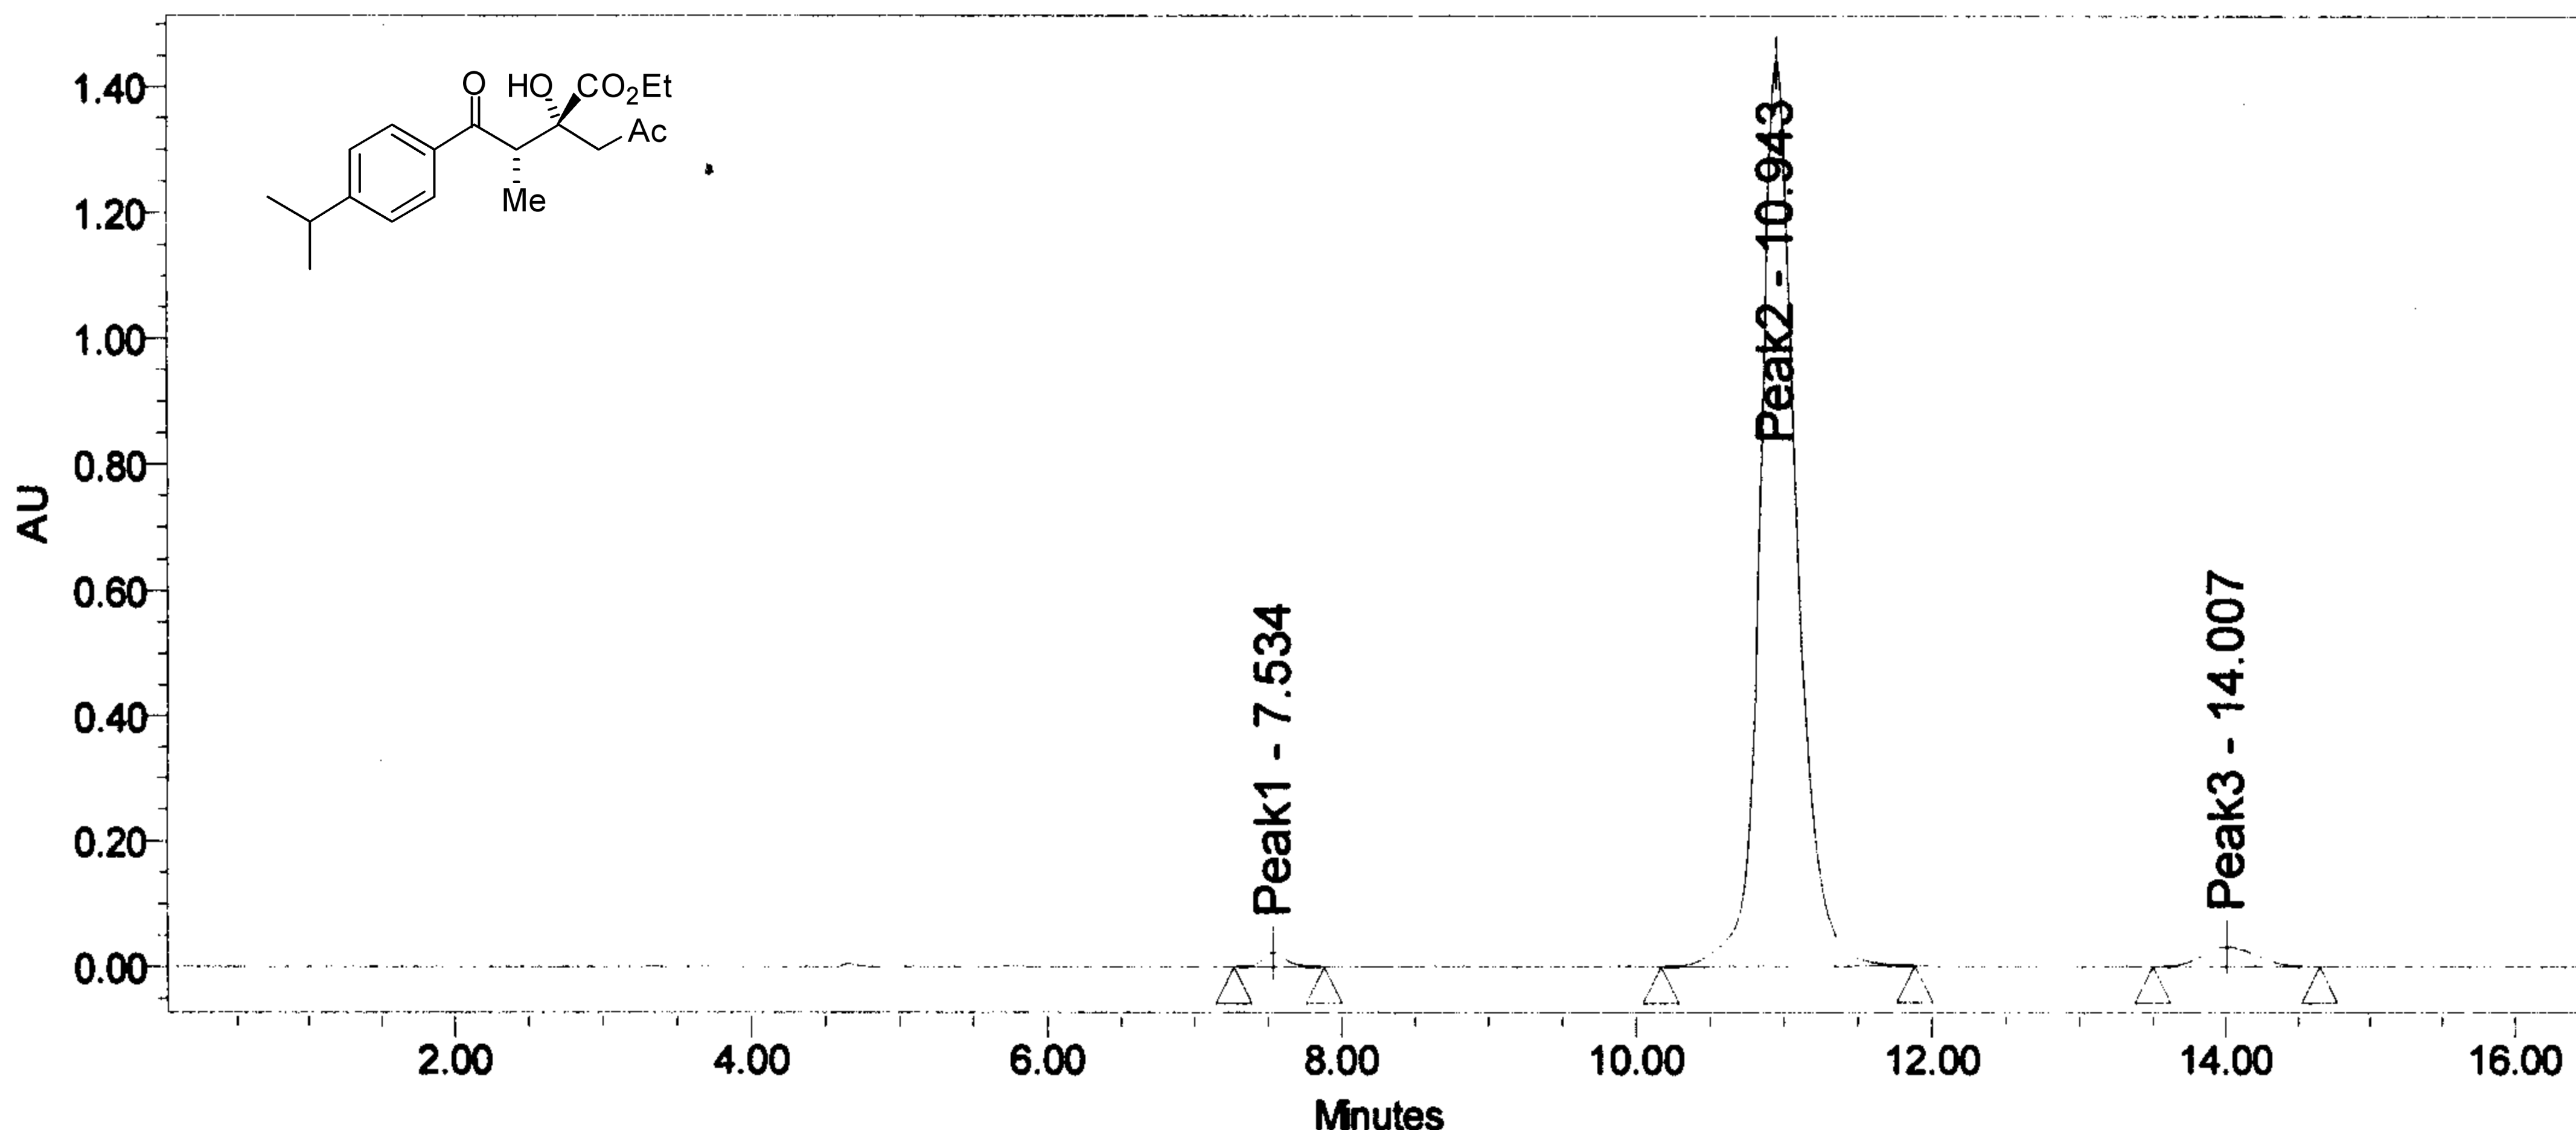

Peak Results

| Name    | RT     | Area     | Height  | Amount | Units | % Area |
|---------|--------|----------|---------|--------|-------|--------|
| 1 Peak1 | 7.534  | 238303   | 22170   |        |       | 0.94   |
| 2 Peak2 | 10.943 | 24359669 | 1443459 |        |       | 95.95  |
| 3 Peak3 | 14.007 | 791092   | 31096   |        |       | 3.12   |

rr 93.7

dr >99:1

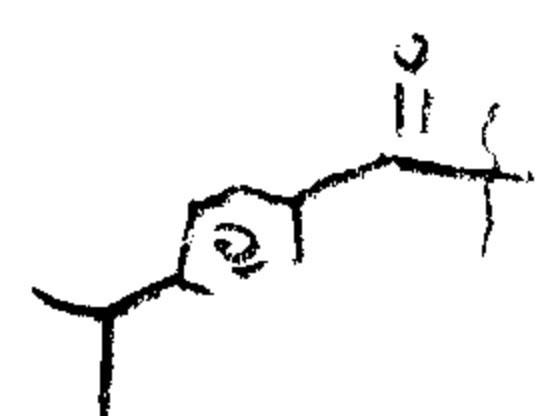

SAMPLE INFORMATION

|                   |                        |                     |              |
|-------------------|------------------------|---------------------|--------------|
| Sample Name:      | yj-2-rac               | Acquired By:        | System       |
| Sample Type:      | Unknown                | Sample Set Name:    |              |
| Vial:             | 1                      | Acq. Method Set:    | Untitled     |
| Injection #:      | 12                     | Processing Method:  | szx1         |
| Injection Volume: | 10.00 ul               | Channel Name:       | 254.0nm      |
| Run Time:         | 60.0 Minutes           | Proc. Chnl. Descr.: | PDA 254.0 nm |
| Date Acquired:    | 2008-4-30 14:20:32 CST |                     |              |
| Date Processed:   | 2008-4-30 14:40:56 CST |                     |              |

Auto-Scaled Chromatogram

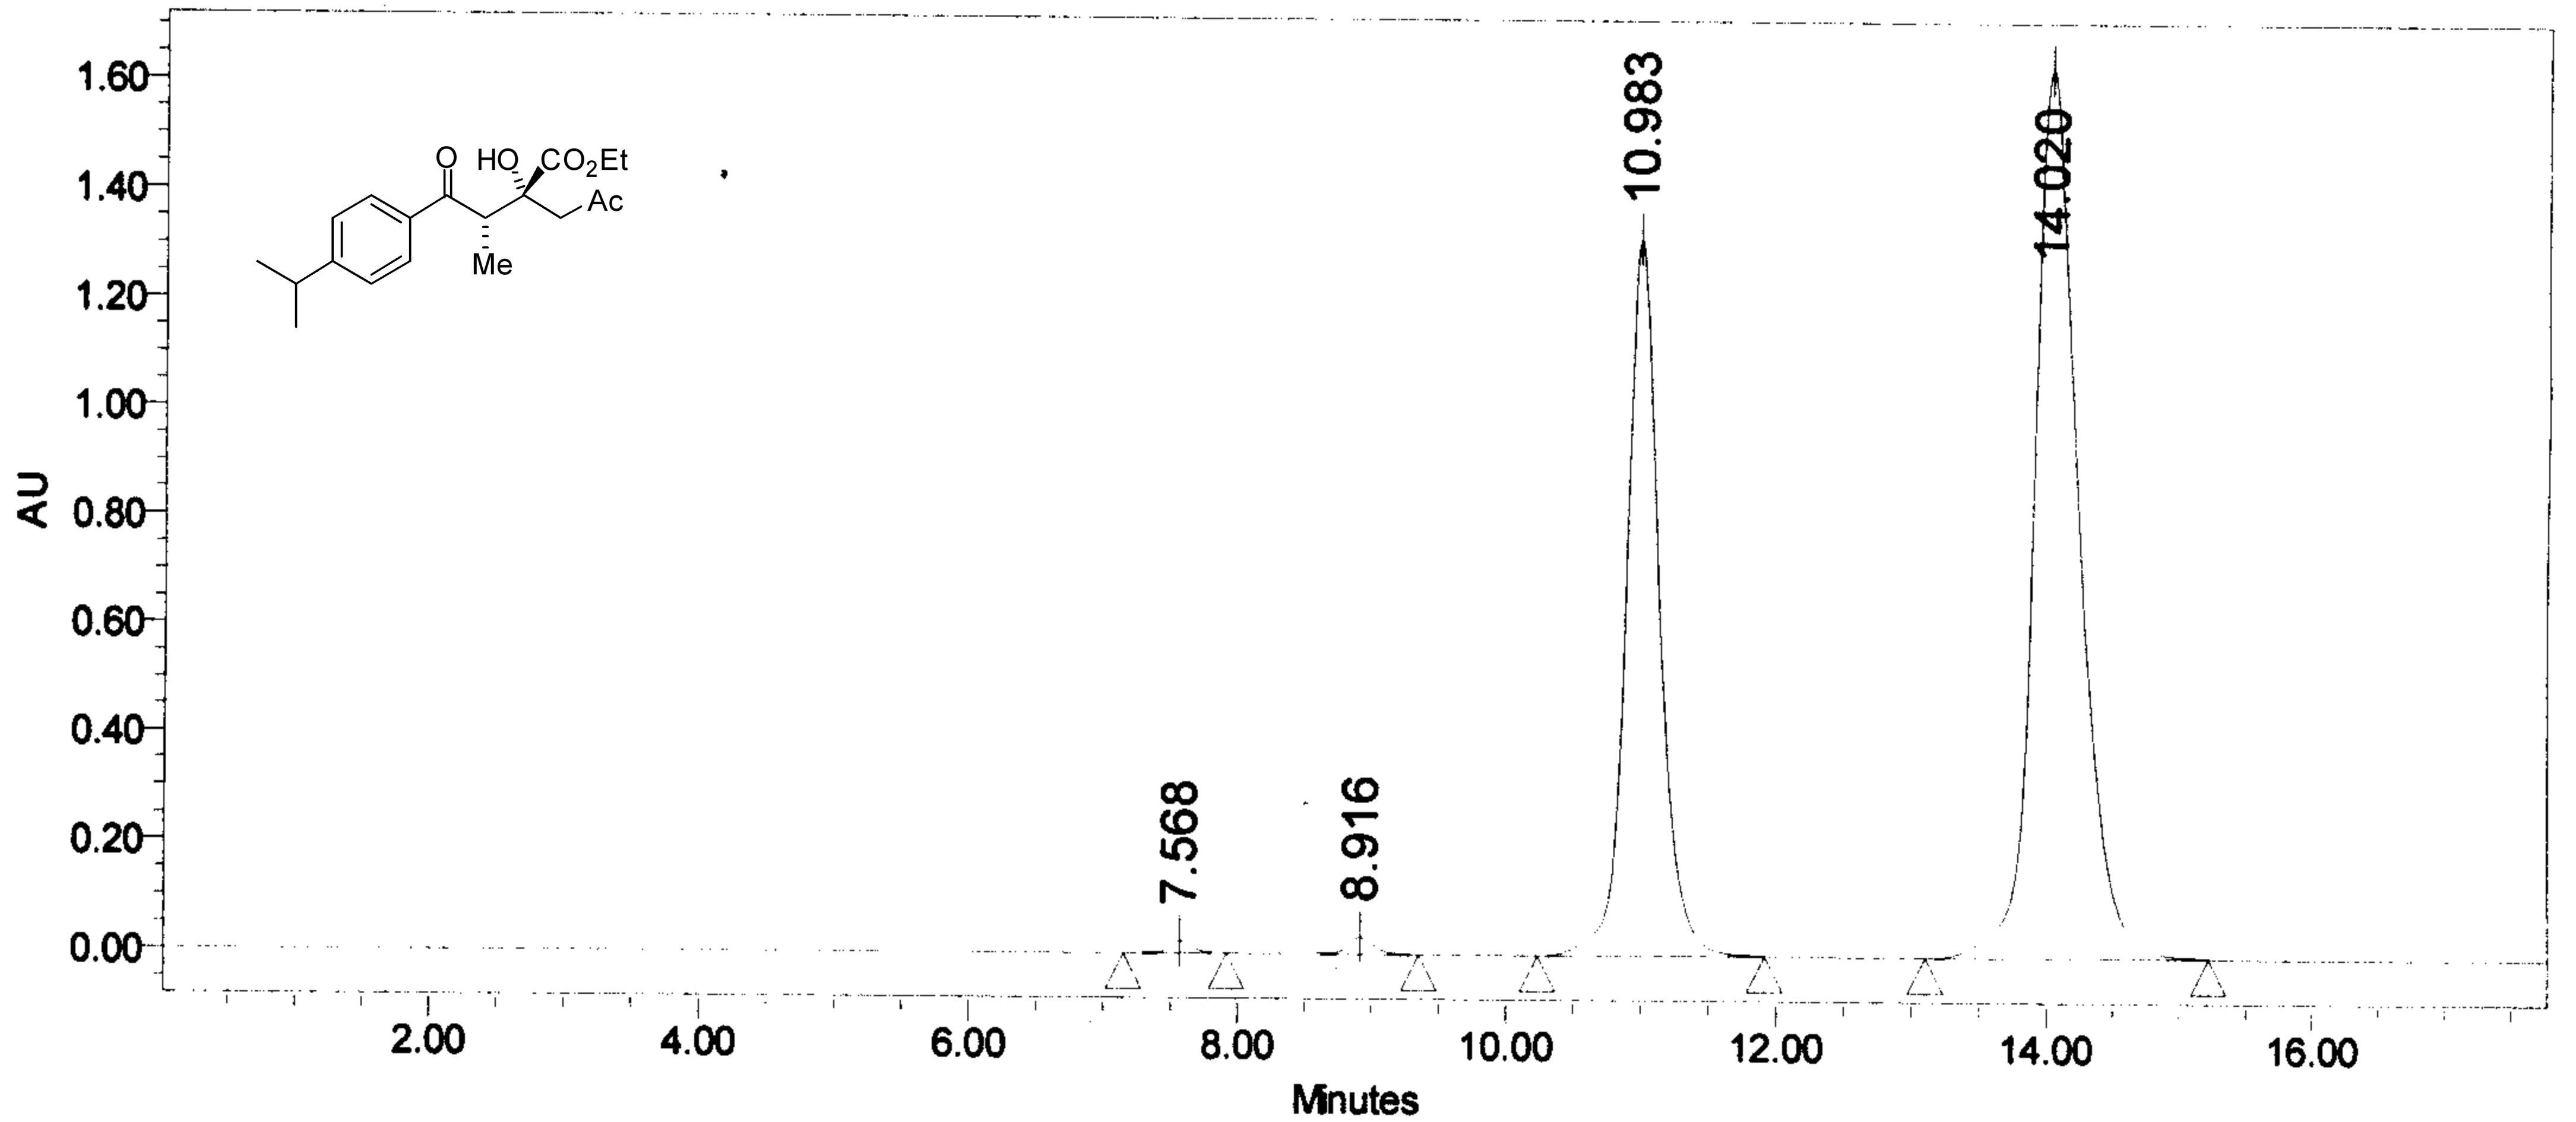

Peak Results

|   | Name | RT     | Area     | Height  | Amount | Units | % Area |
|---|------|--------|----------|---------|--------|-------|--------|
| 1 |      | 7.568  | 249439   | 22456   |        |       | 0.41   |
| 2 |      | 8.916  | 418312   | 31559   |        |       | 0.68   |
| 3 |      | 10.983 | 22564599 | 1321216 |        |       | 36.90  |
| 4 |      | 14.020 | 37912178 | 1637800 |        |       | 62.00  |

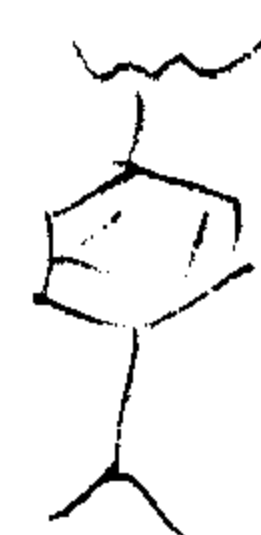

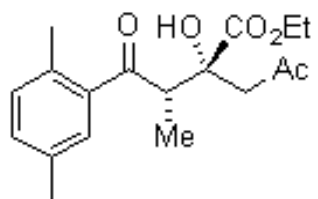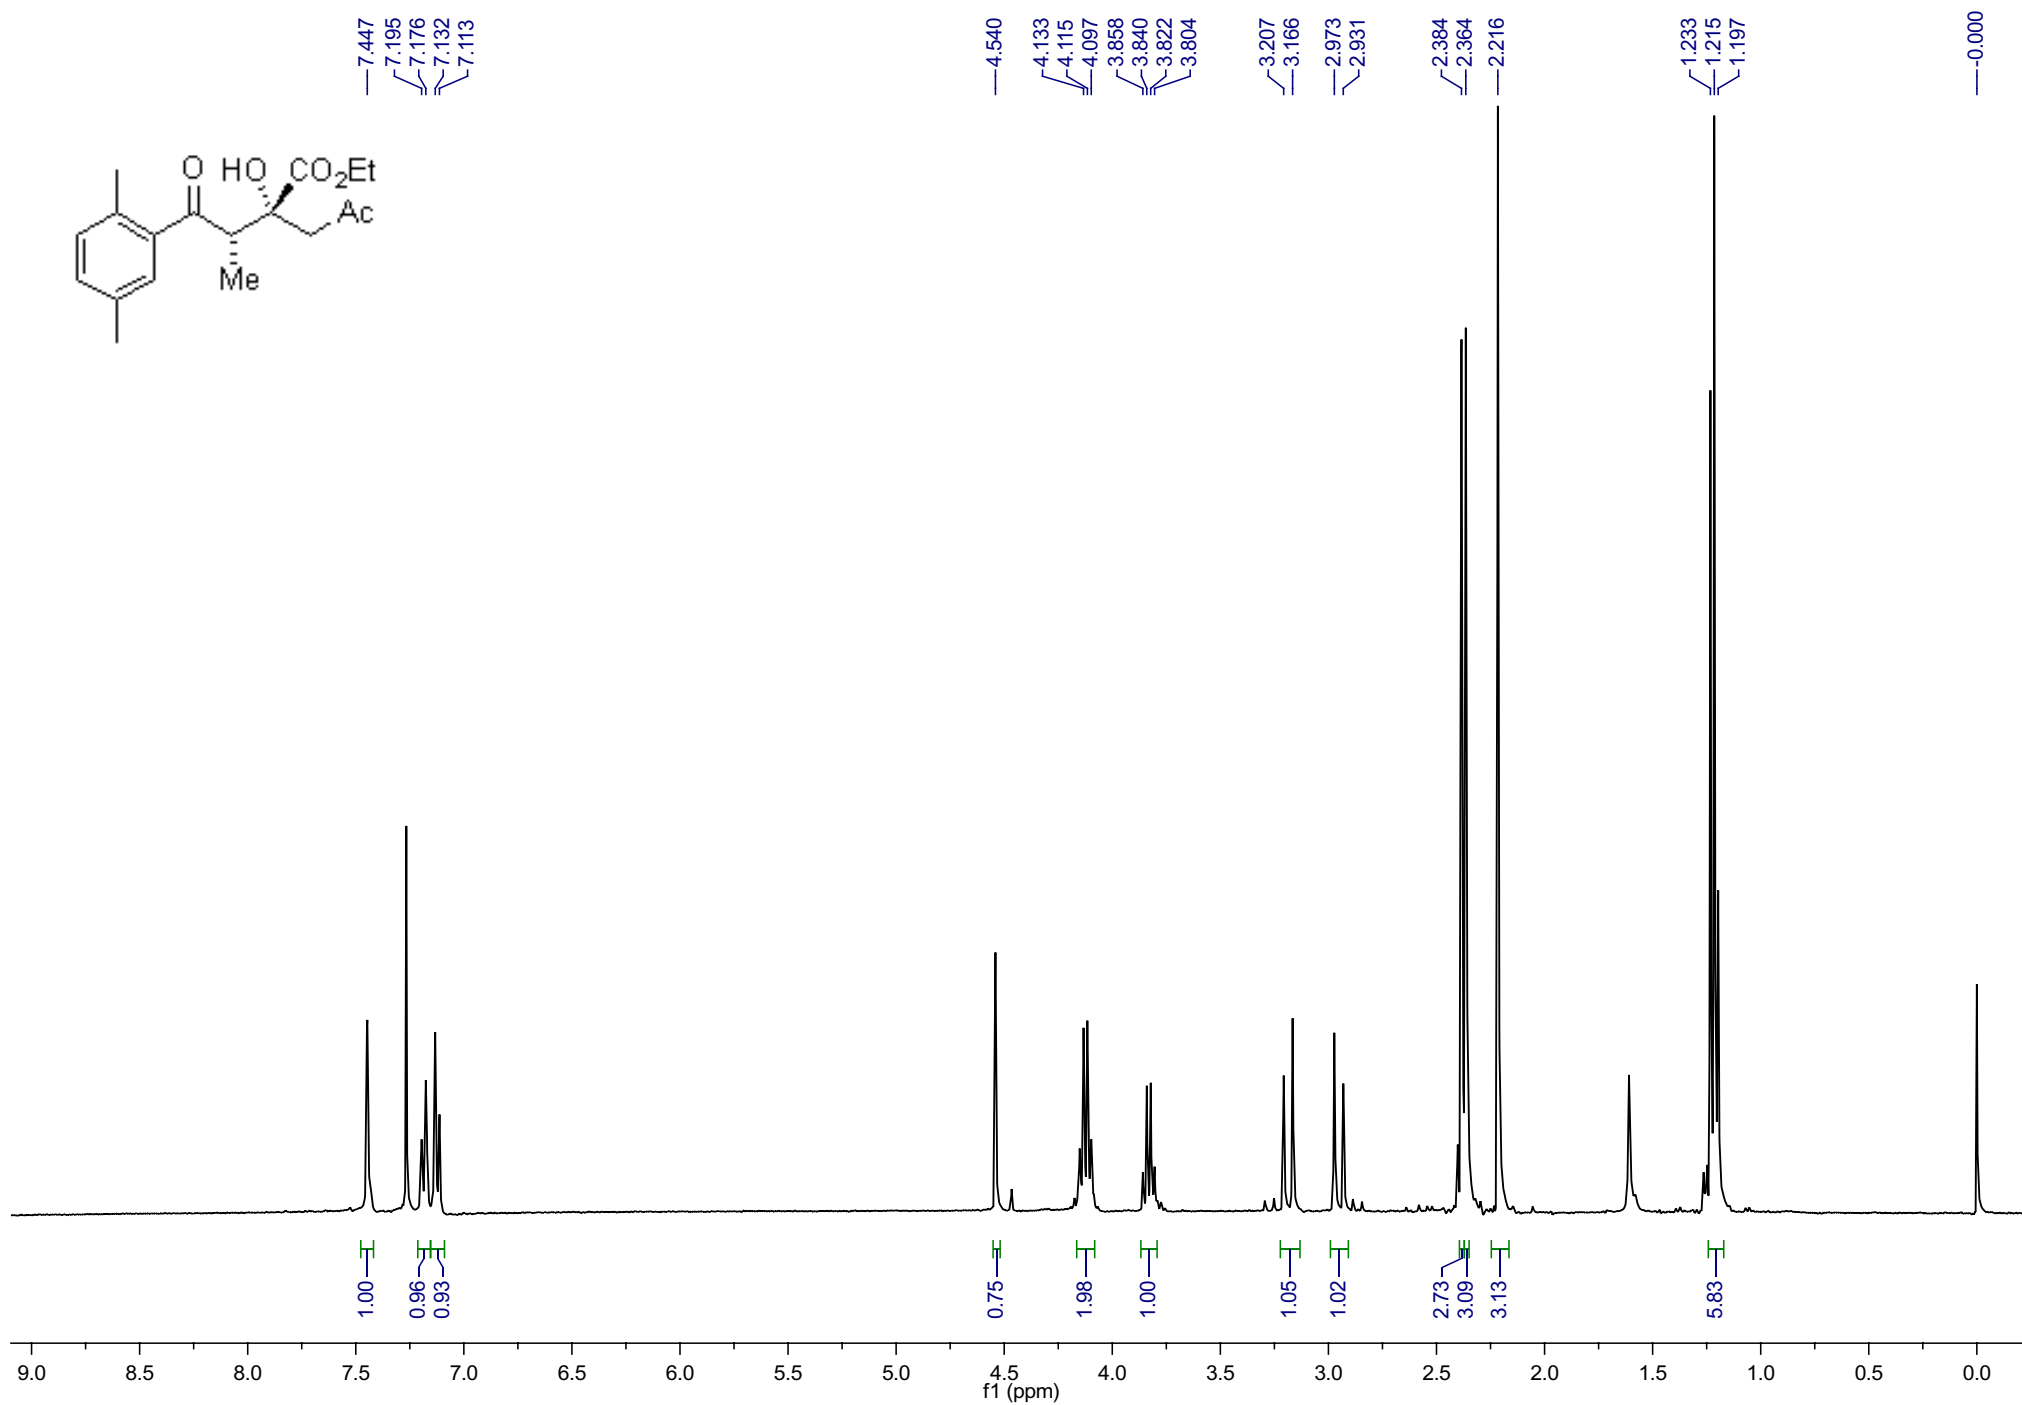

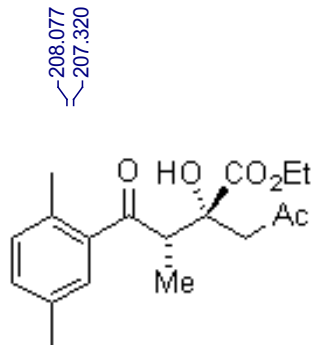

208.077  
207.320

174.423

138.080  
135.552  
135.469  
132.615  
132.010  
129.343

77.500

62.125

48.534  
48.397

31.544

21.277  
20.689

14.280  
12.319

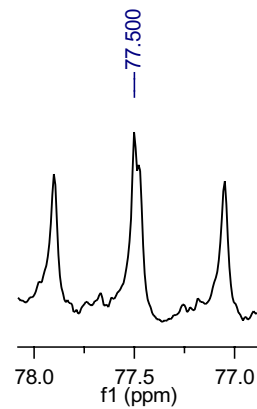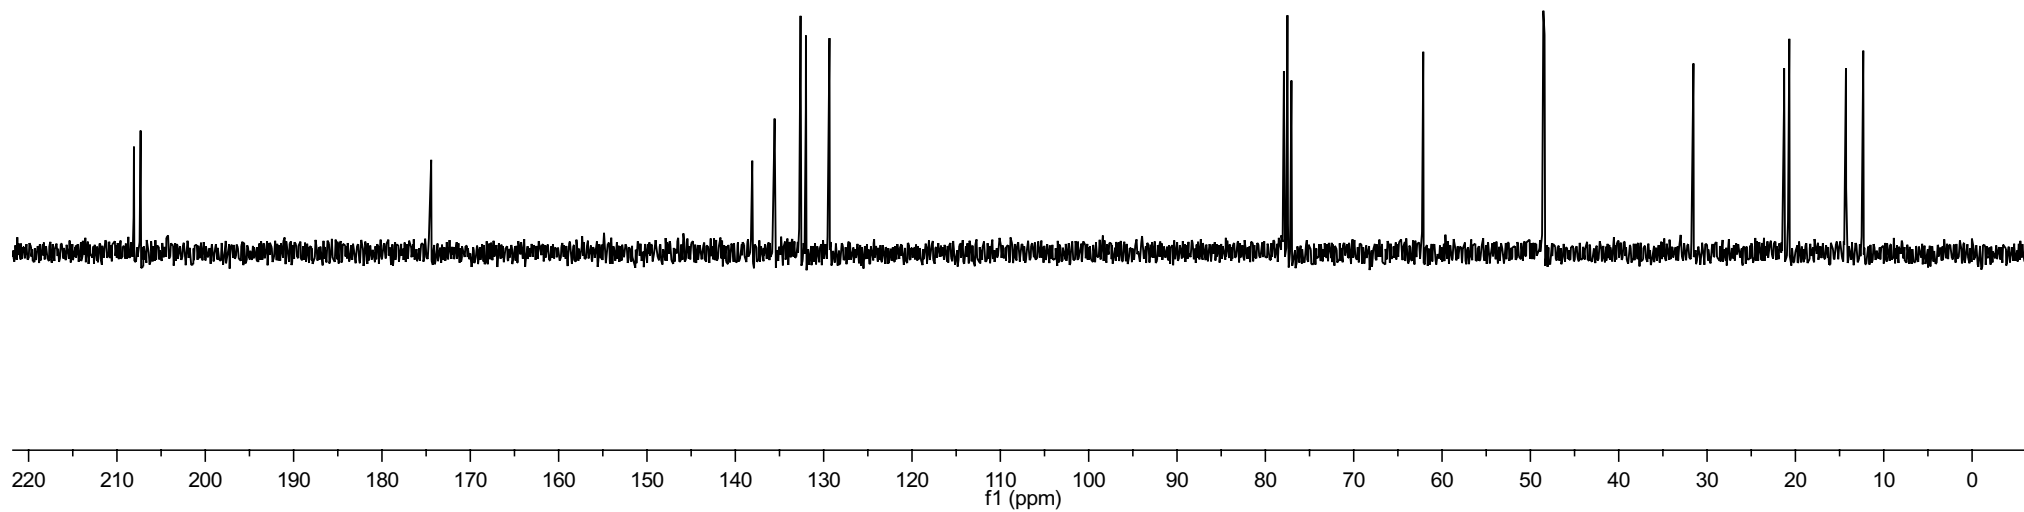



SUDA-TOFMS-EI-080704

yj-7 120 (1.999) Cm (115:120-(98:102+158:163))

TOF MS EI+  
2.13e5

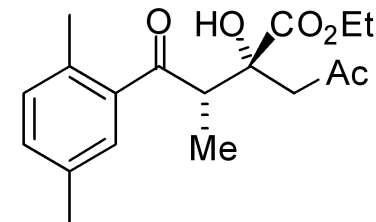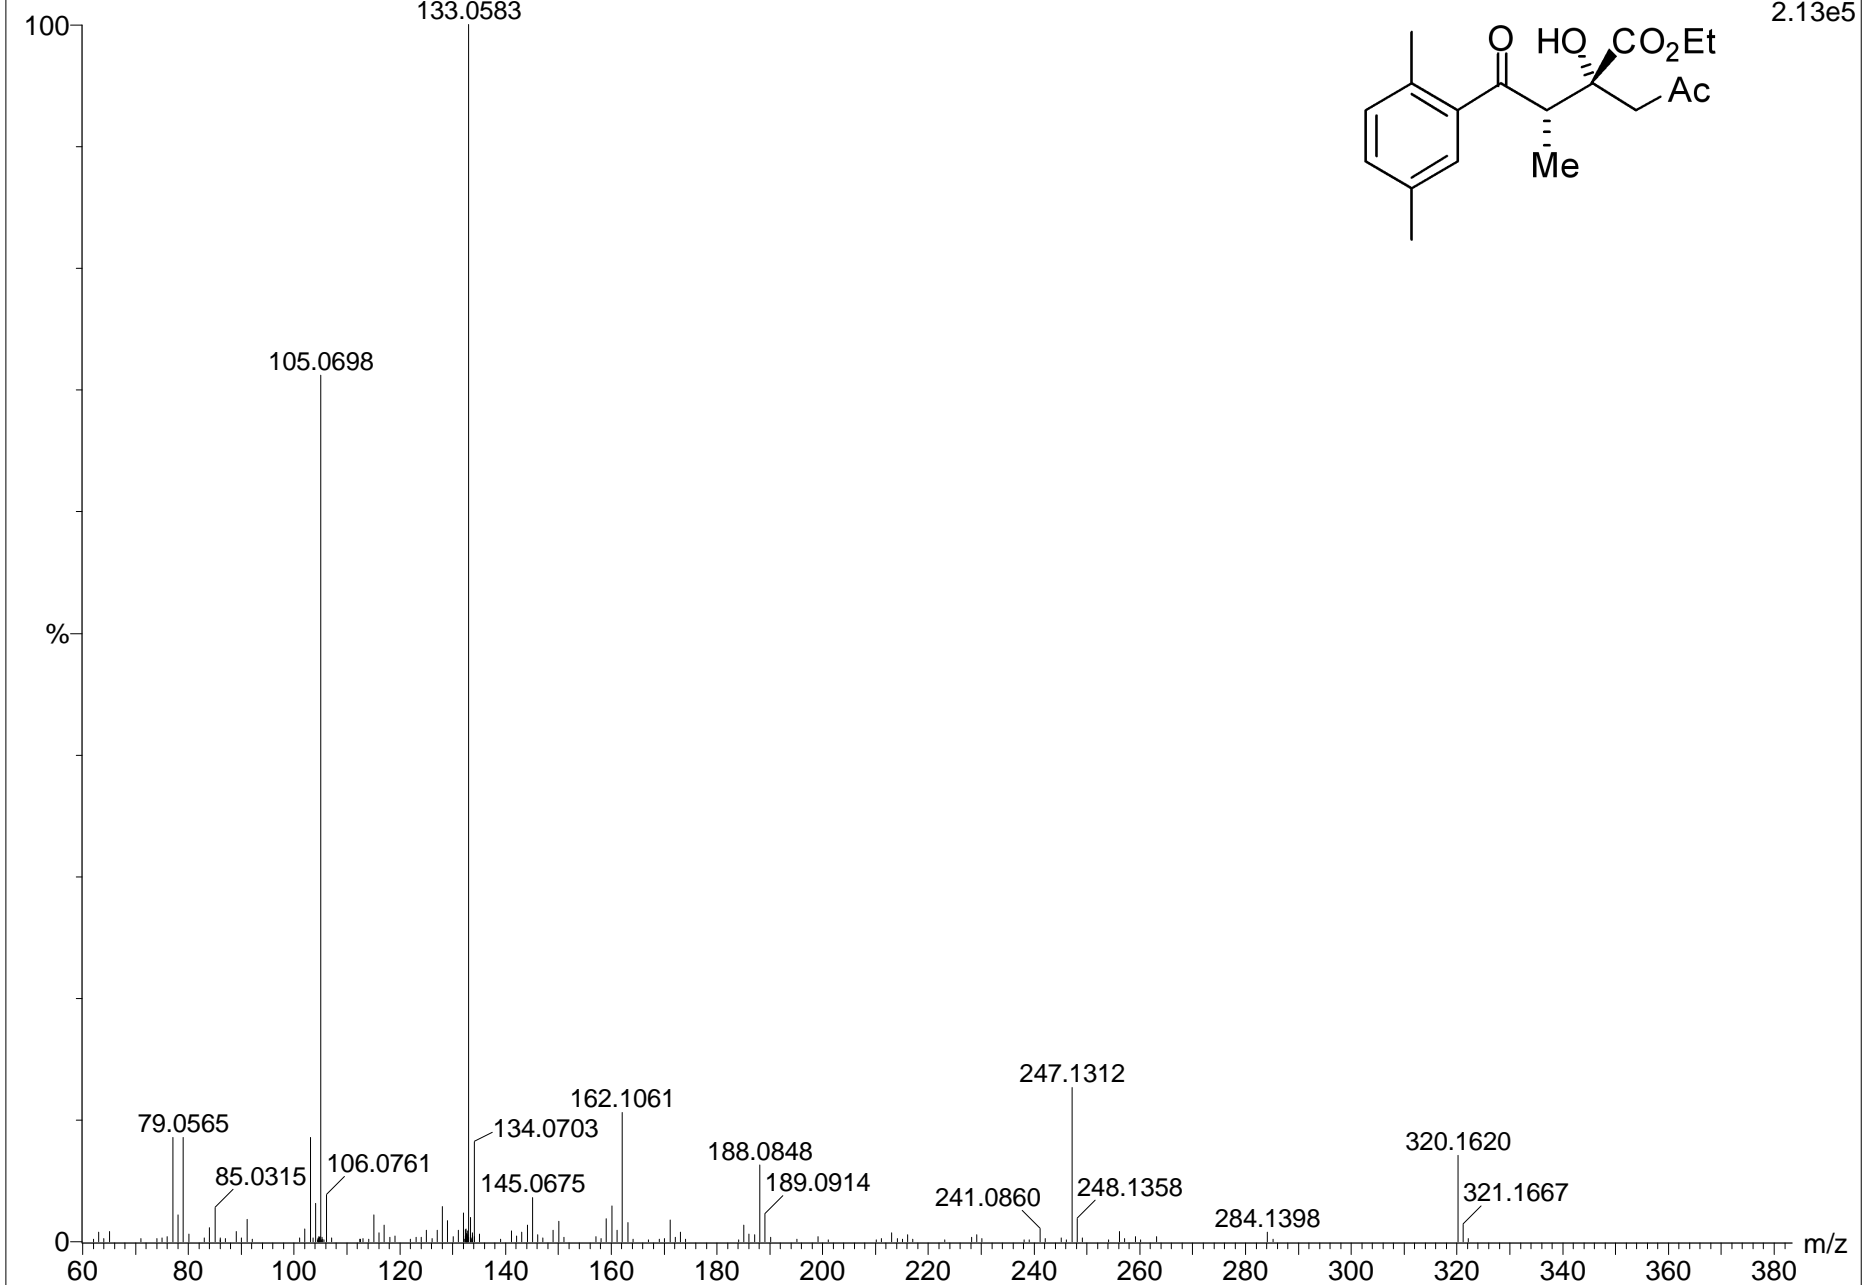

SAMPLE INFORMATION

|                   |                        |                     |              |
|-------------------|------------------------|---------------------|--------------|
| Sample Name:      | yj-1                   | Acquired By:        | System       |
| Sample Type:      | Unknown                | Sample Set Name:    |              |
| Vial:             | 1                      | Acq. Method Set:    | Untitled     |
| Injection #:      | 11                     | Processing Method:  | LC PQ        |
| Injection Volume: | 10.00 ul               | Channel Name:       | 254.0nm      |
| Run Time:         | 40.0 Minutes           | Proc. Chnl. Descr.: | PDA 254.0 nm |
| Date Acquired:    | 2008-4-30 14:05:17 CST |                     |              |
| Date Processed:   | 2008-4-30 14:22:30 CST |                     |              |

Auto-Scaled Chromatogram

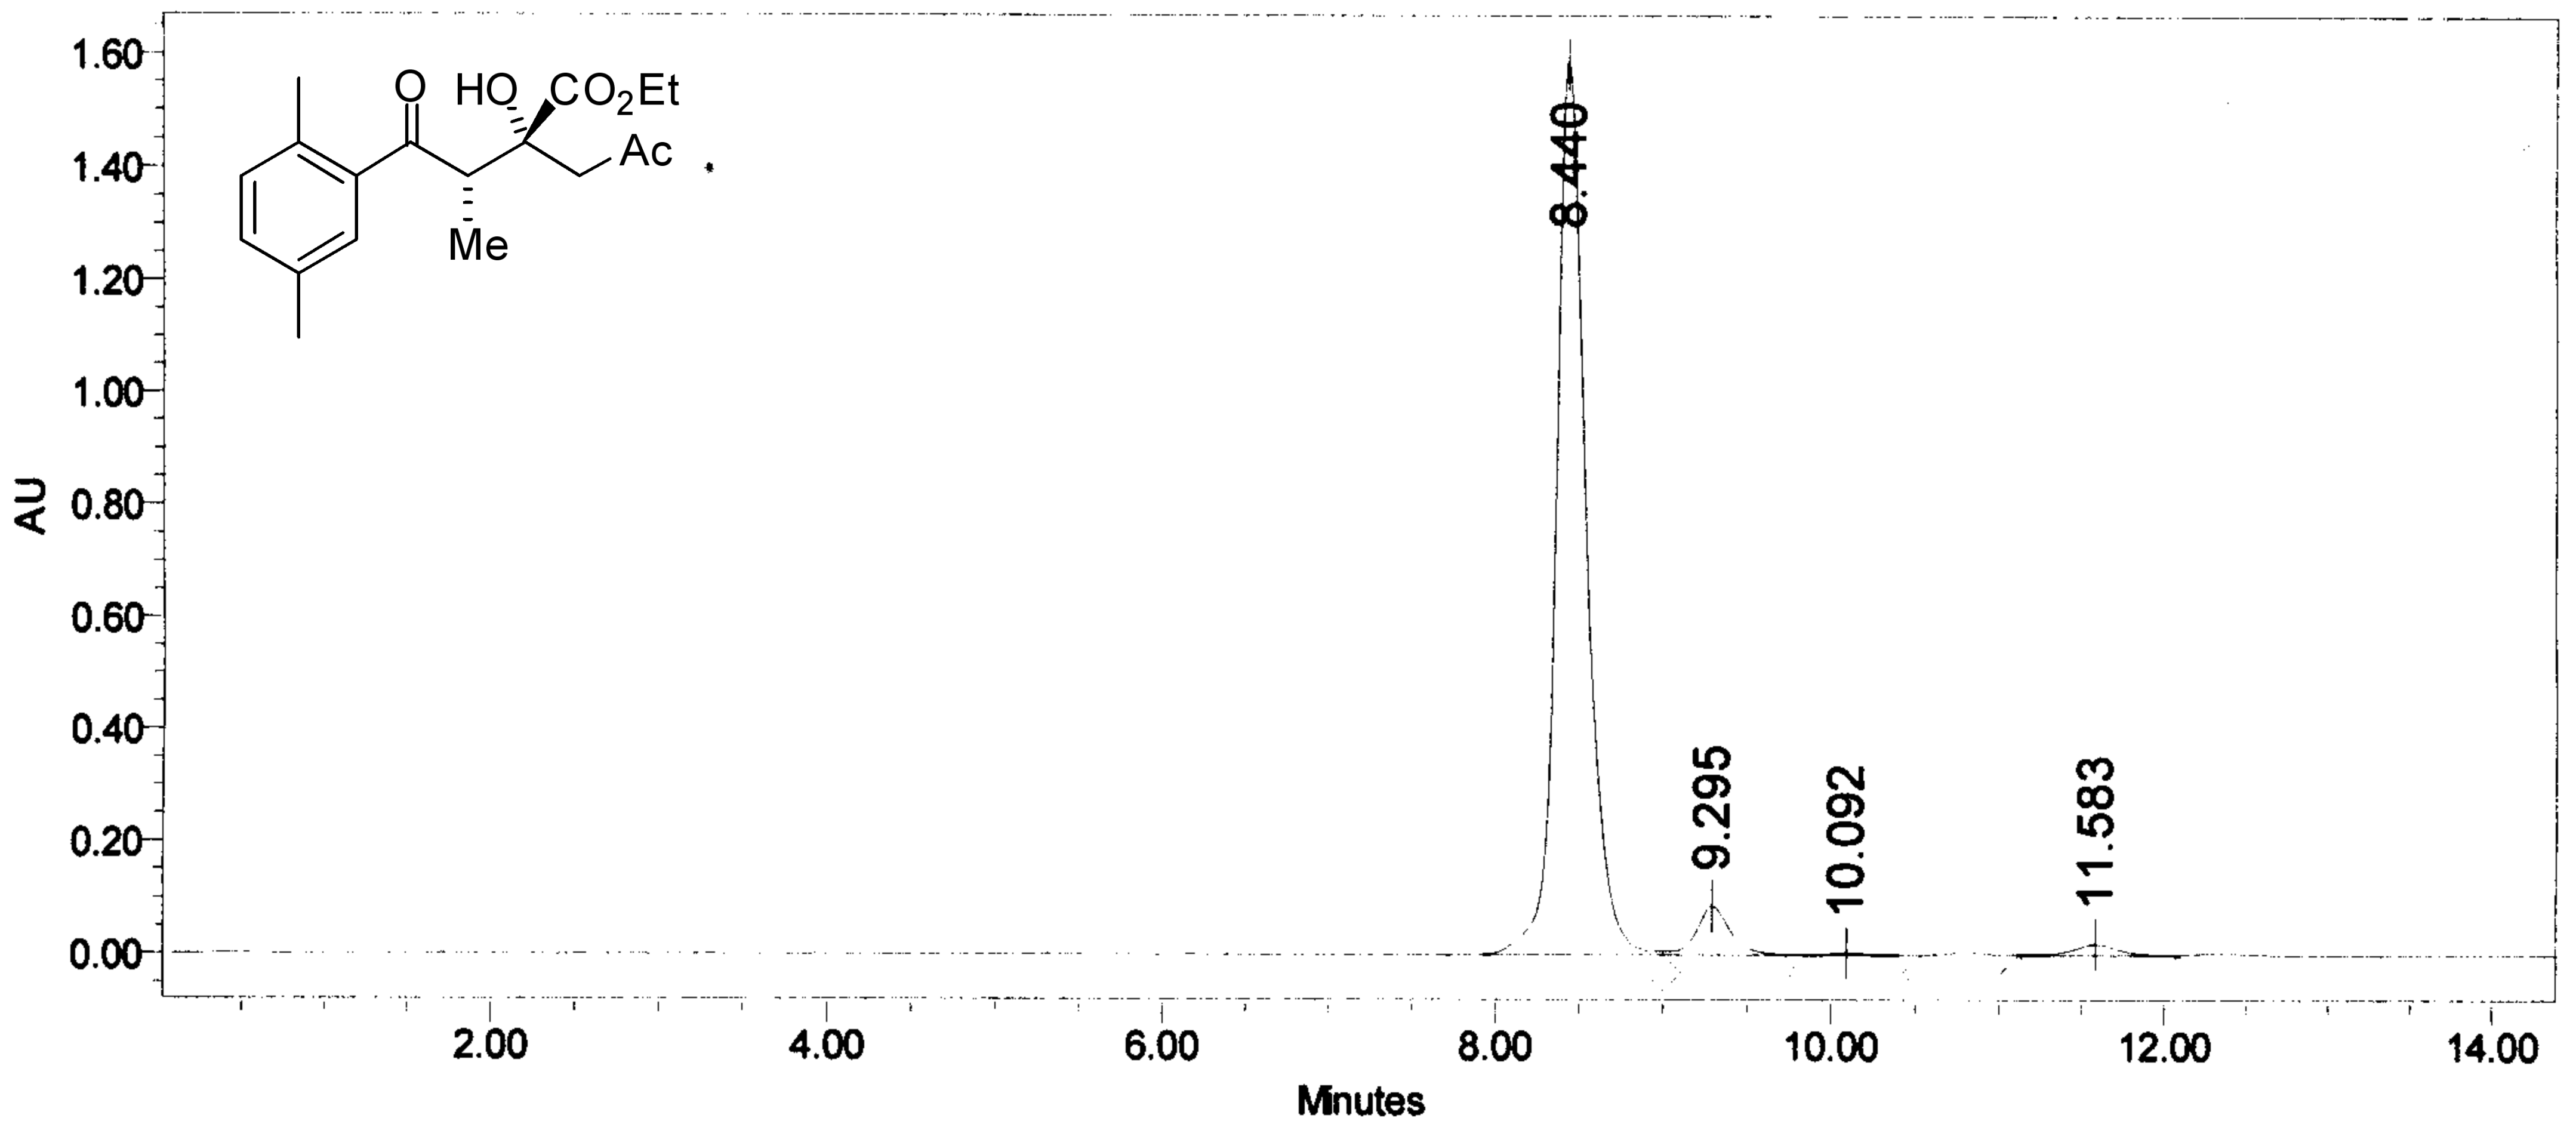

Peak Results

| Name | RT     | Area     | Height  | Amount | Units | % Area |
|------|--------|----------|---------|--------|-------|--------|
| 1    | 8.440  | 19780618 | 1593493 |        |       | 92.23  |
| 2    | 9.295  | 1228770  | 87261   |        |       | 5.73   |
| 3    | 10.092 | 62635    | 3772    |        |       | 0.29   |
| 4    | 11.583 | 375405   | 19663   |        |       | 1.75   |

*ca. 96.13%*

*dr 94:6*

## SAMPLE INFORMATION

|                   |                        |                     |              |
|-------------------|------------------------|---------------------|--------------|
| Sample Name:      | yj-1-rac               | Acquired By:        | System       |
| Sample Type:      | Unknown                | Sample Set Name:    |              |
| Vial:             | 1                      | Acq. Method Set:    | Untitled     |
| Injection #:      | 10                     | Processing Method:  | szx1         |
| Injection Volume: | 10.00 ul               | Channel Name:       | 254.0nm      |
| Run Time:         | 40.0 Minutes           | Proc. Chnl. Descr.: | PDA 254.0 nm |
| Date Acquired:    | 2008-4-30 13:49:20 CST |                     |              |
| Date Processed:   | 2008-4-30 14:06:37 CST |                     |              |

## Auto-Scaled Chromatogram

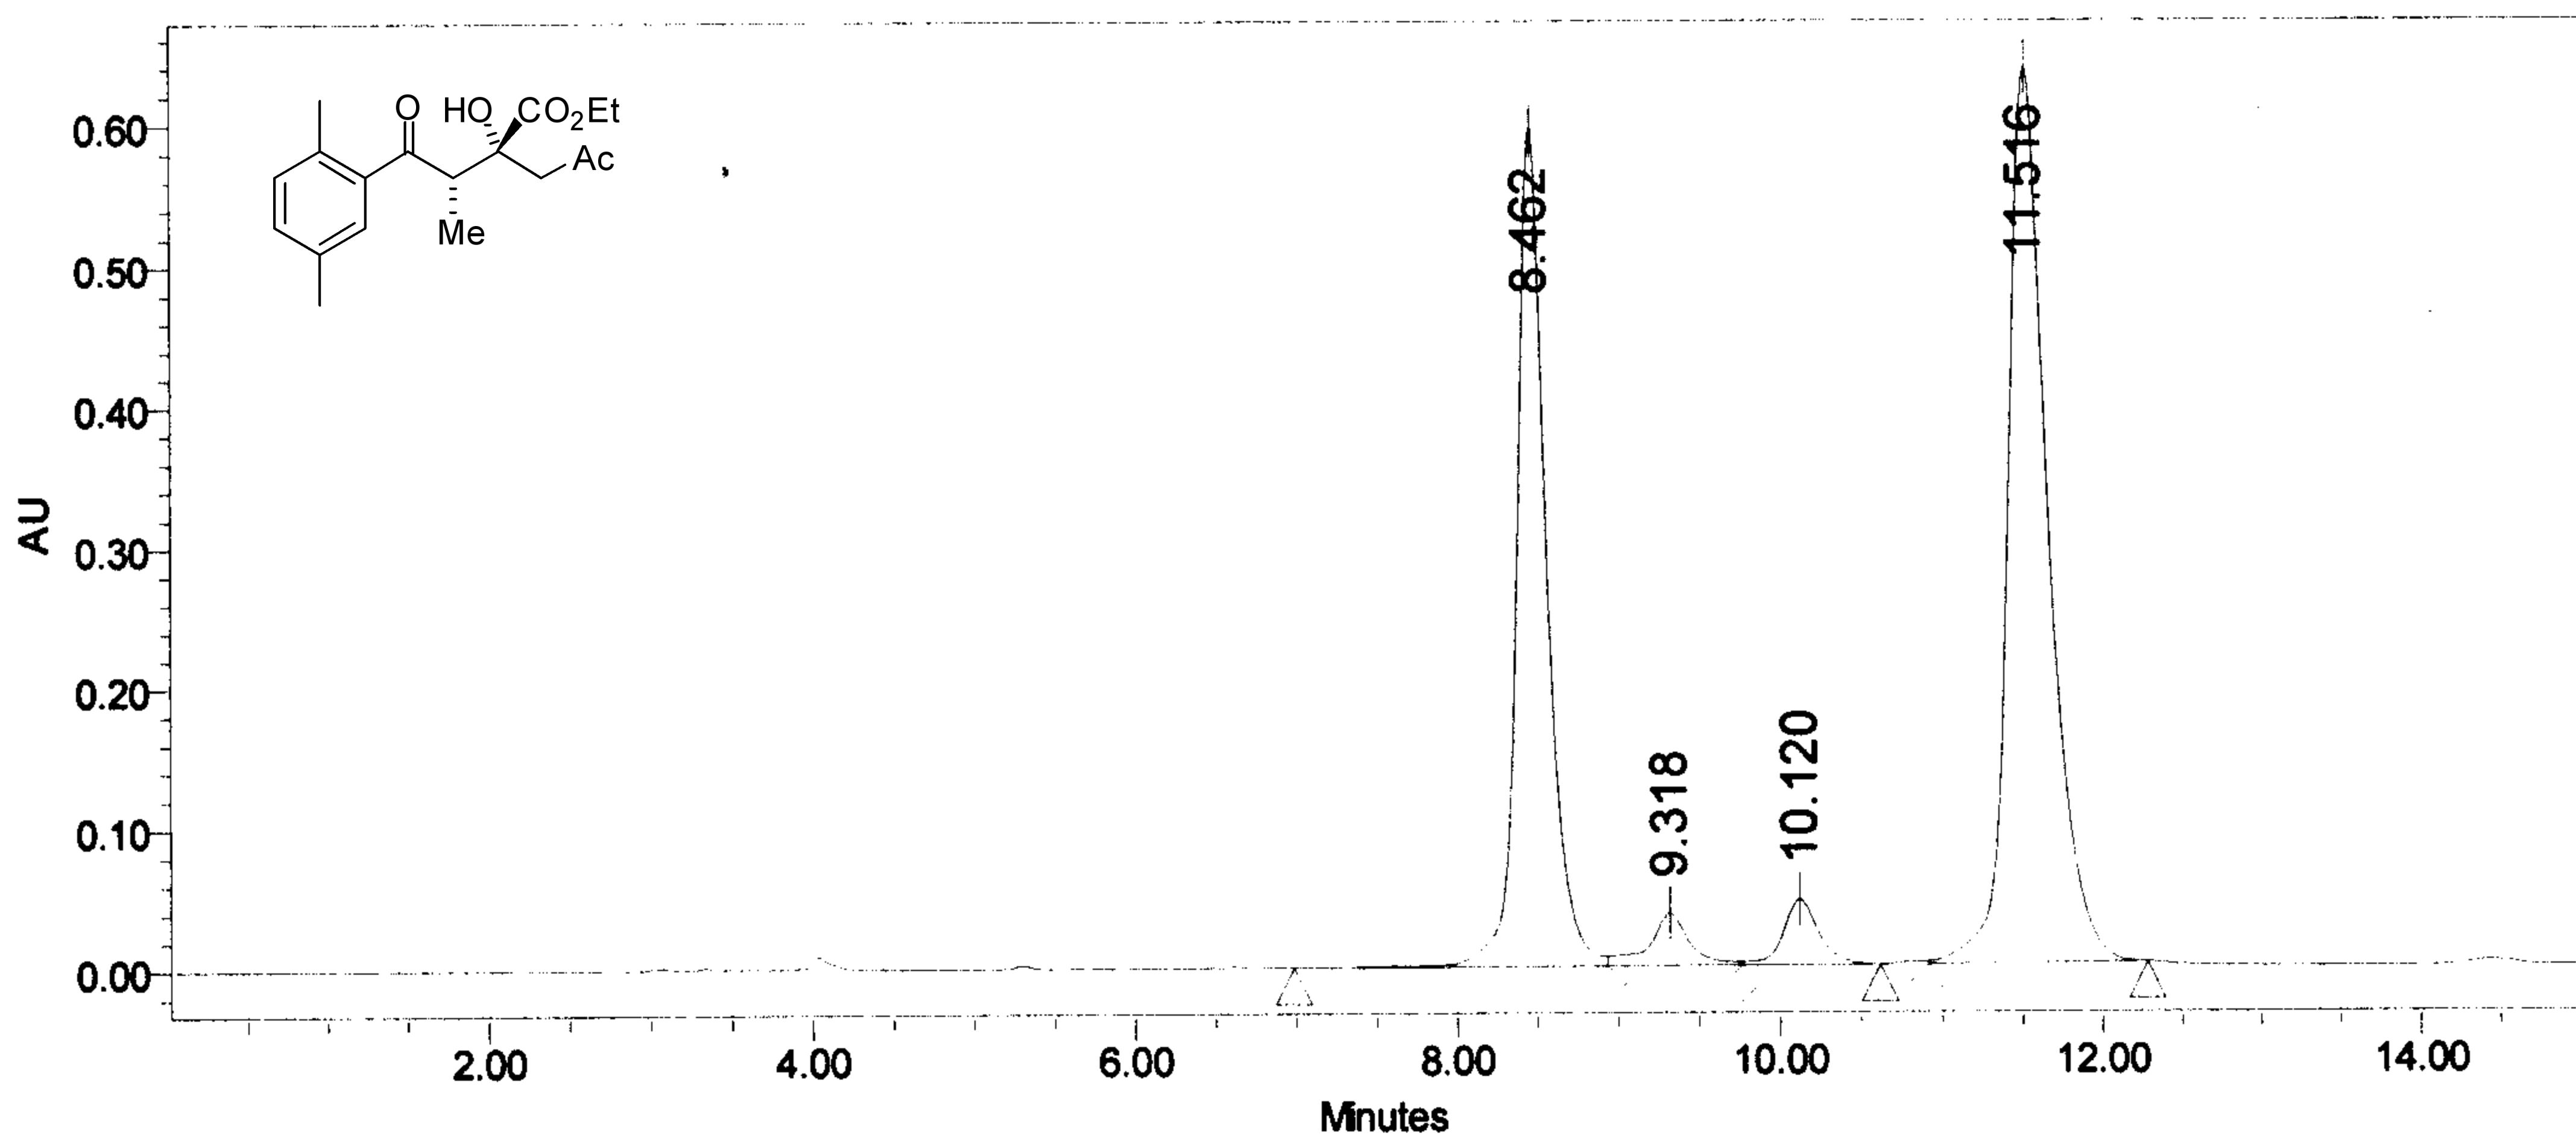

## Peak Results

| Name | RT     | Area     | Height | Amount | Units | % Area |
|------|--------|----------|--------|--------|-------|--------|
| 1    | 8.462  | 7574844  | 596495 |        |       | 37.74  |
| 2    | 9.318  | 655707   | 37164  |        |       | 3.27   |
| 3    | 10.120 | 700410   | 46181  |        |       | 3.49   |
| 4    | 11.516 | 11141227 | 636693 |        |       | 55.51  |

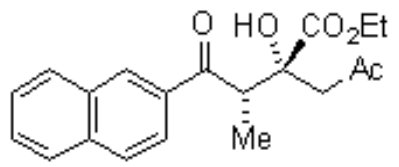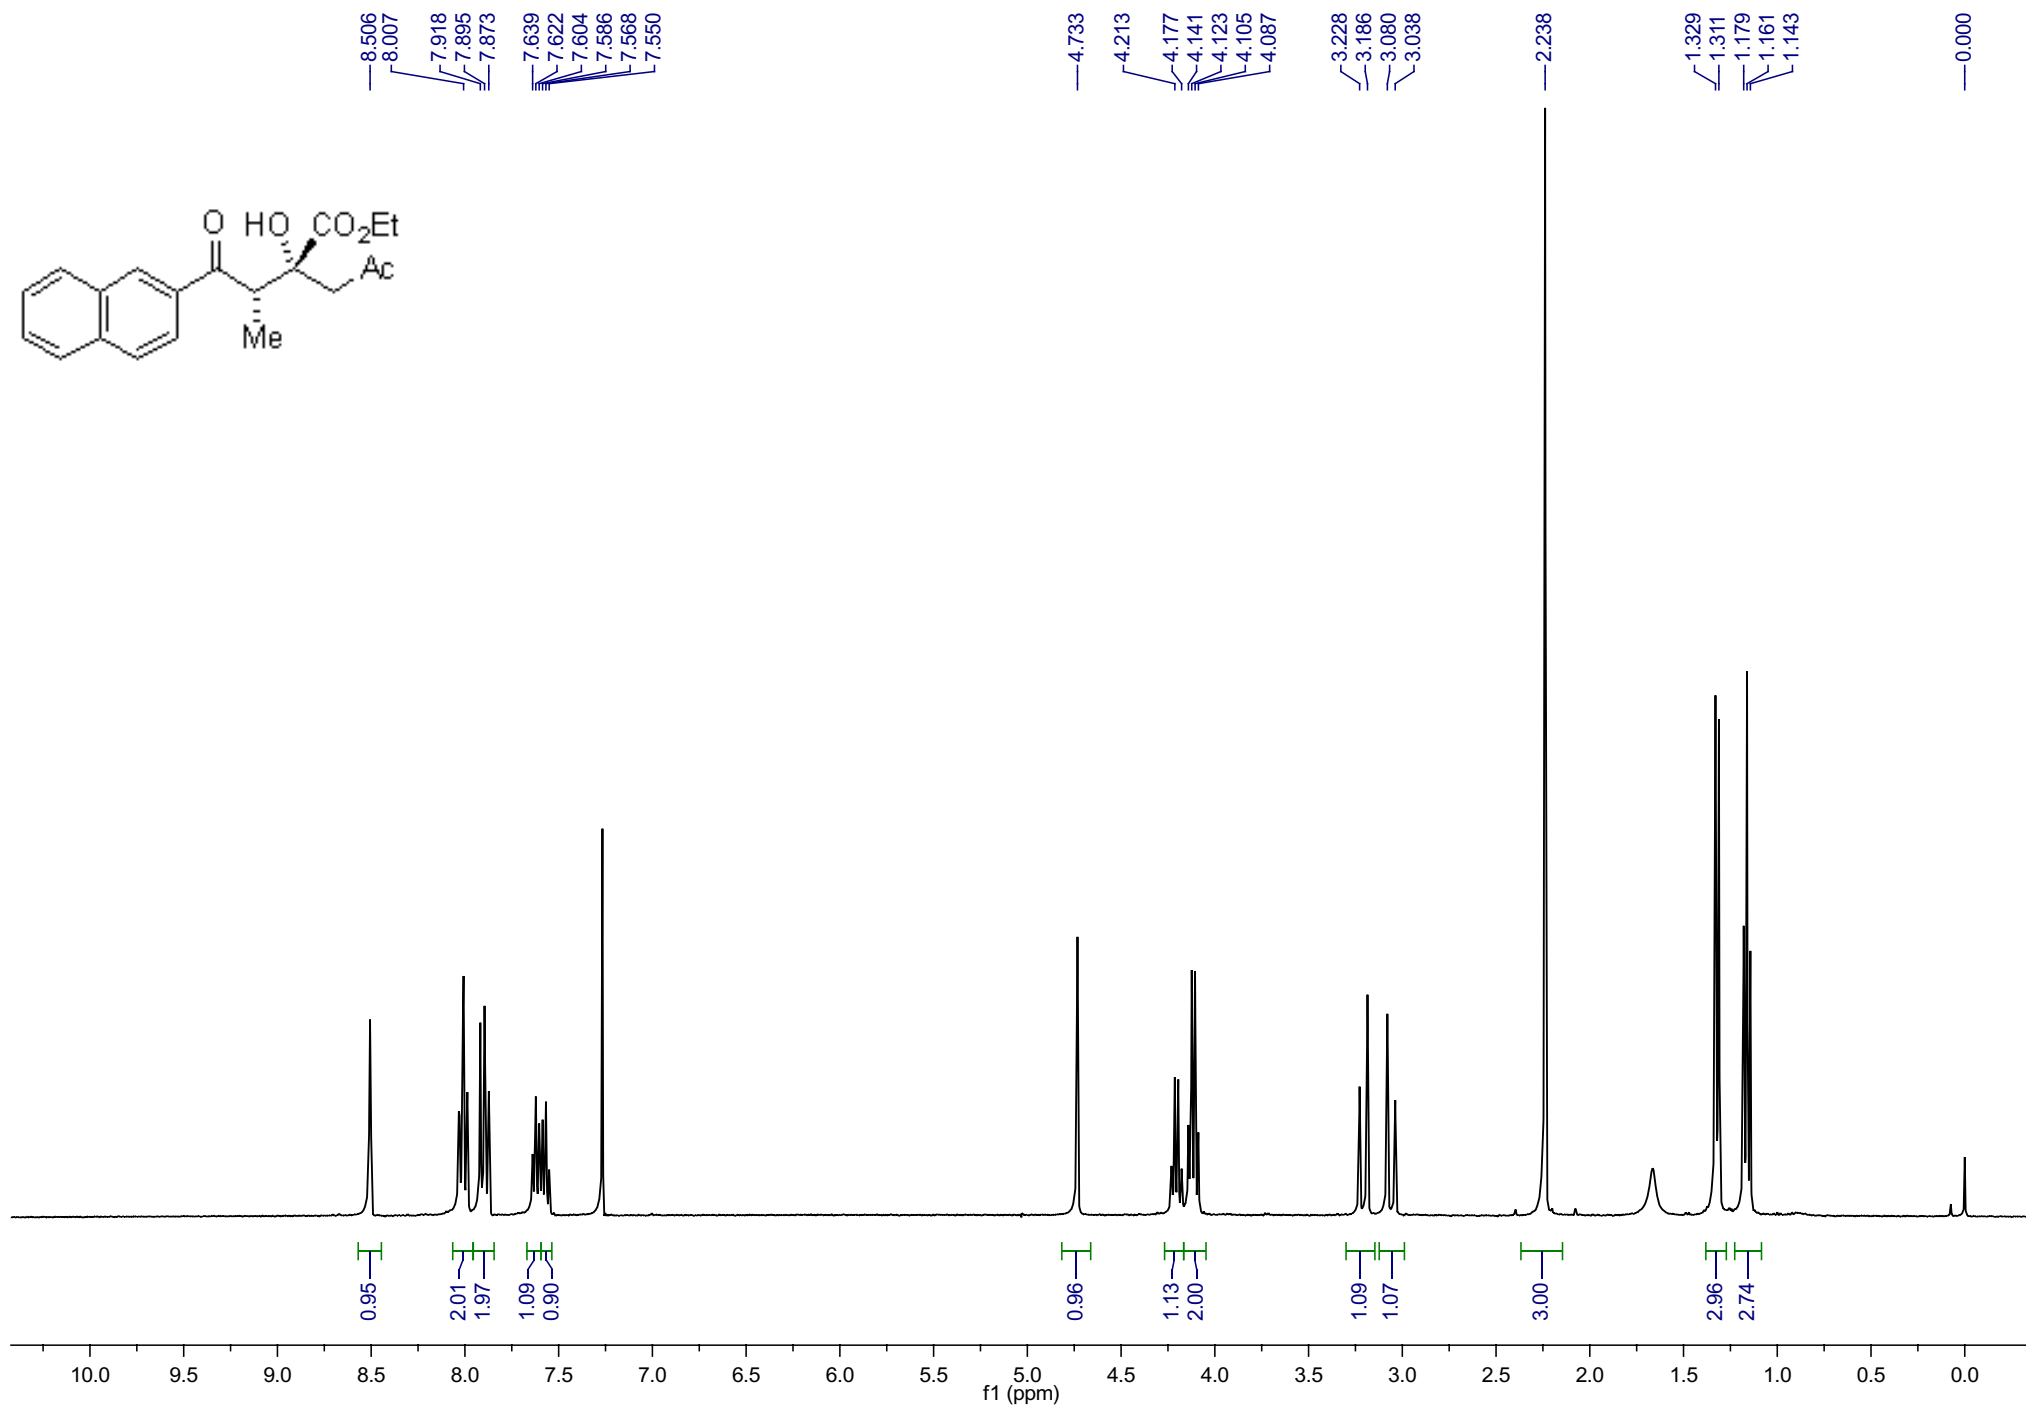

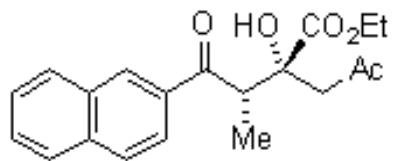

— 207.734  
— 204.584

— 174.353

136.220  
134.284  
132.882  
131.080  
130.228  
129.242  
129.033  
128.196  
127.324  
— 124.544

— 77.953

— 62.301

— 48.312  
— 44.997

— 31.640

14.414  
13.183

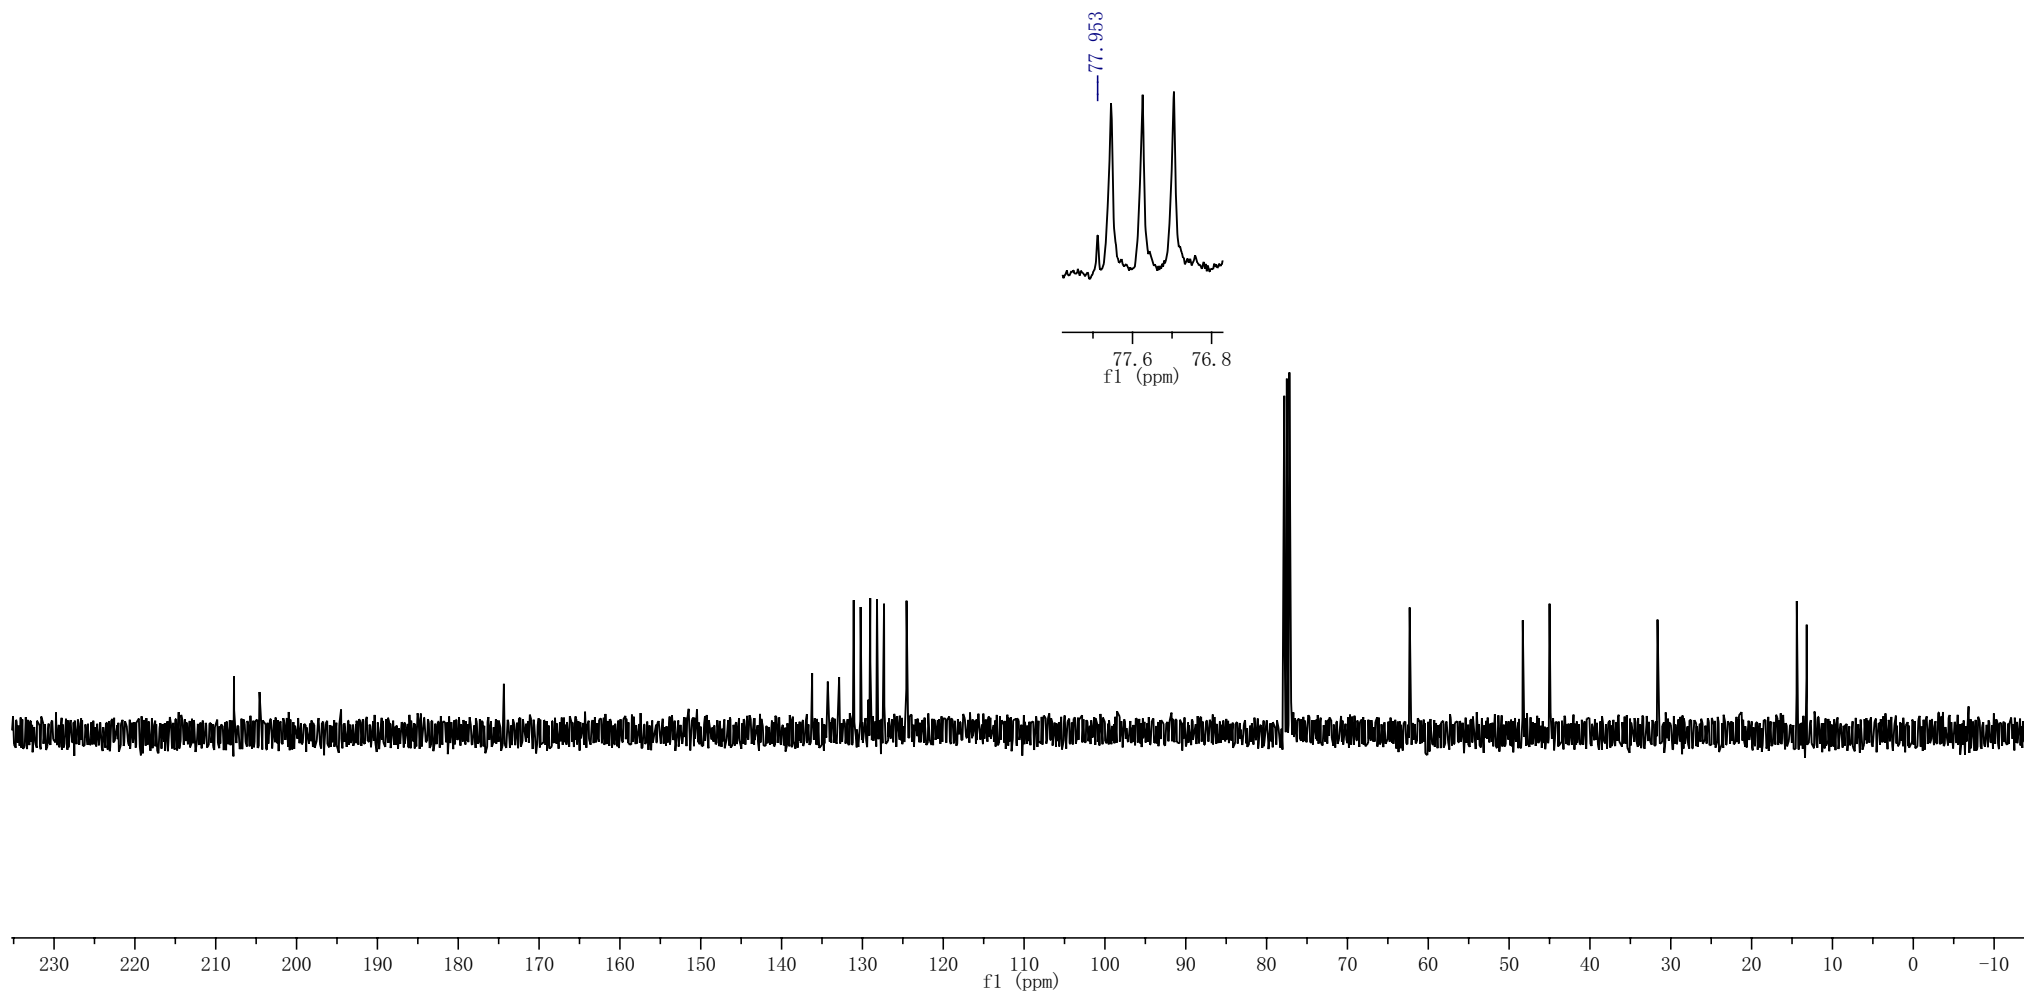

SUDA-TOFMS-EI-080703

yj-11 117 (1.950) Cm (116:120-(155:162+173:194))

TOF MS EI+  
2.09e5

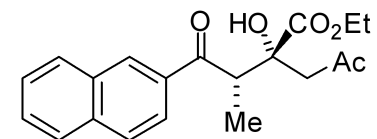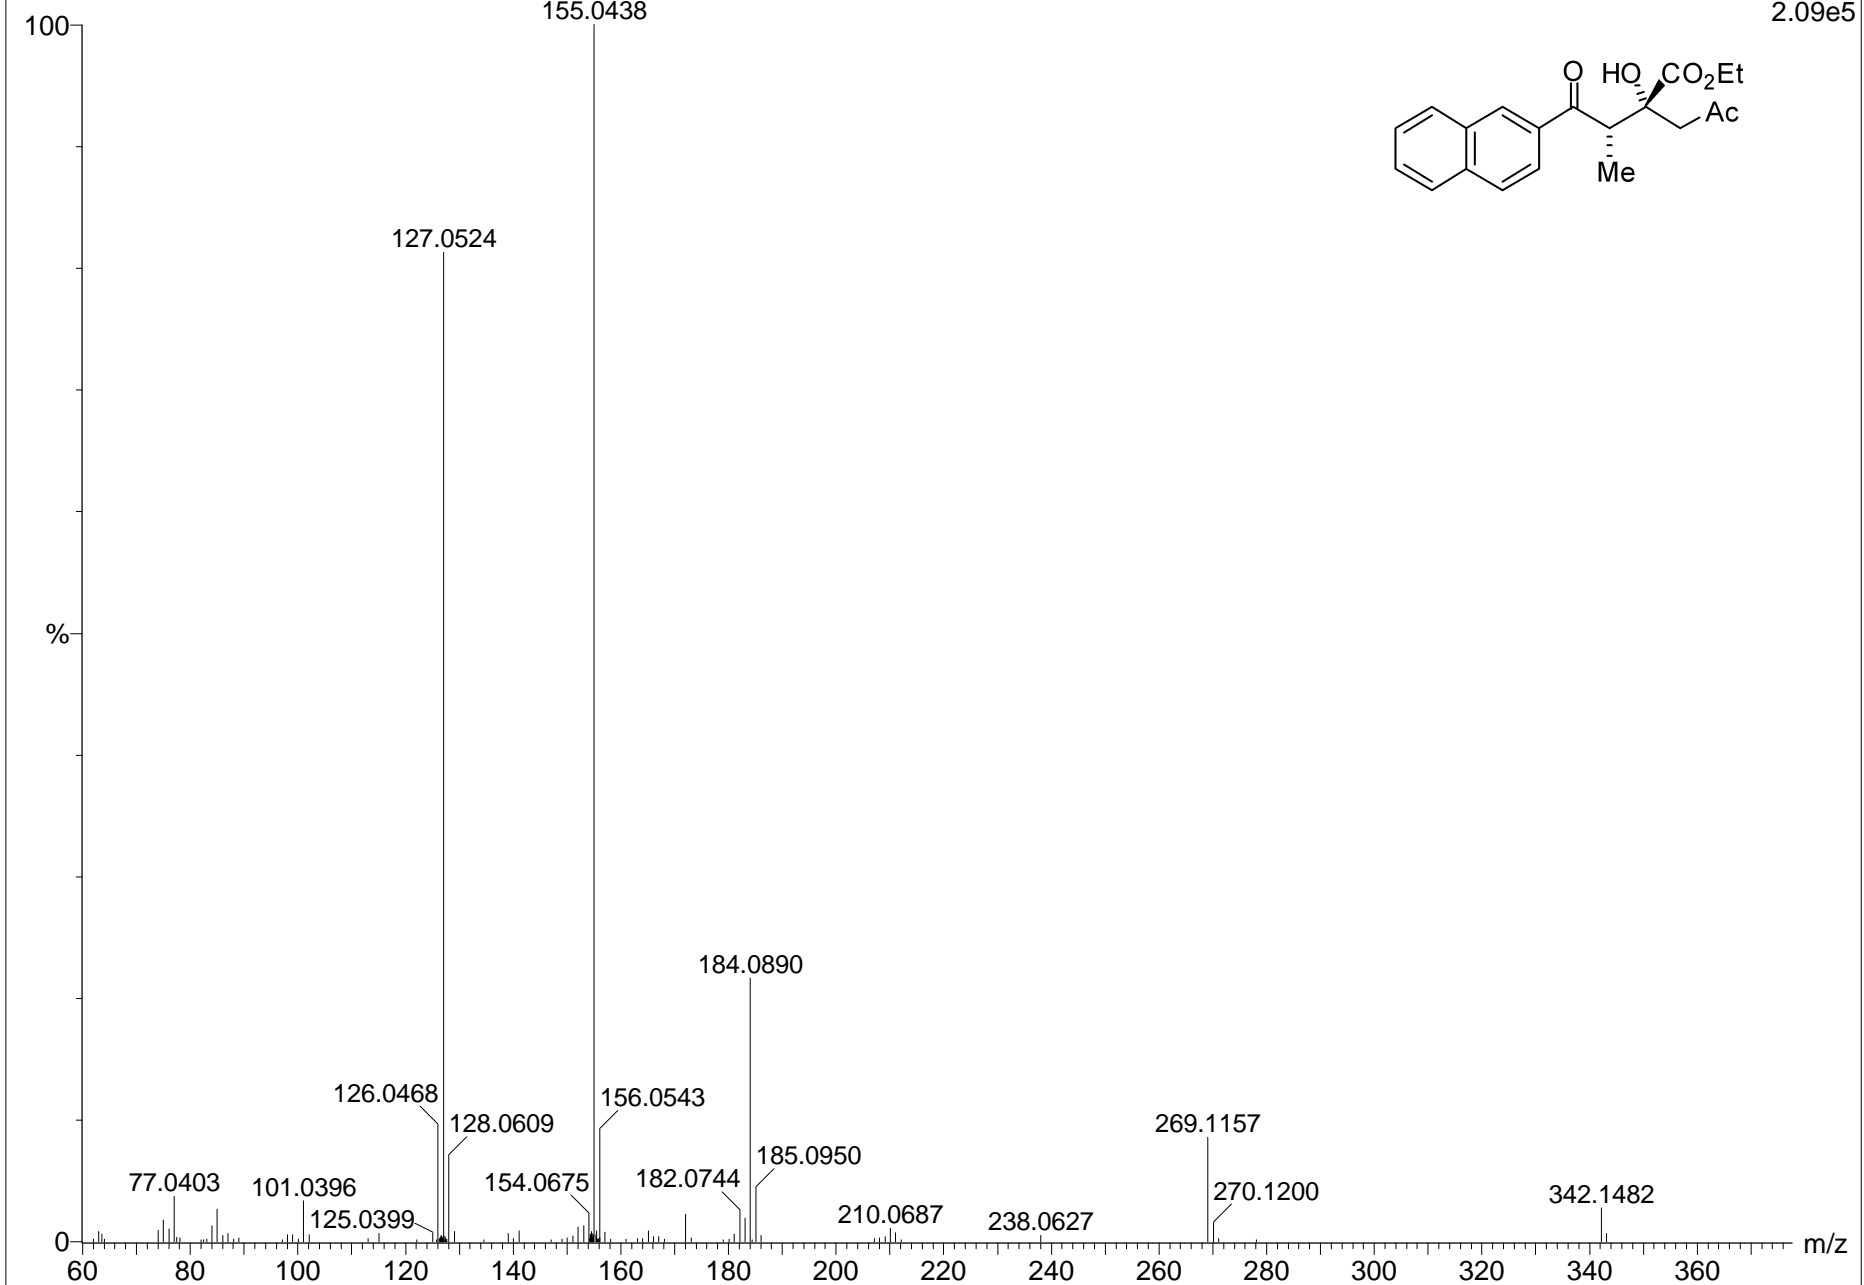

| SAMPLE INFORMATION |                        |                     |              |
|--------------------|------------------------|---------------------|--------------|
| Sample Name:       | yj-1                   | Acquired By:        | System       |
| Sample Type:       | Unknown                | Sample Set Name:    |              |
| Vial:              | 1                      | Acq. Method Set:    | Test         |
| Injection #:       | 2                      | Processing Method:  | 2            |
| Injection Volume:  | 10.00 ul               | Channel Name:       | 250.0nm      |
| Run Time:          | 80.0 Minutes           | Proc. Chnl. Descr.: | PDA 250.0 nm |
| Date Acquired:     | 2008-4-11 12:15:57 CST |                     |              |
| Date Processed:    | 2008-4-11 13:08:26 CST |                     |              |

Auto-Scaled Chromatogram

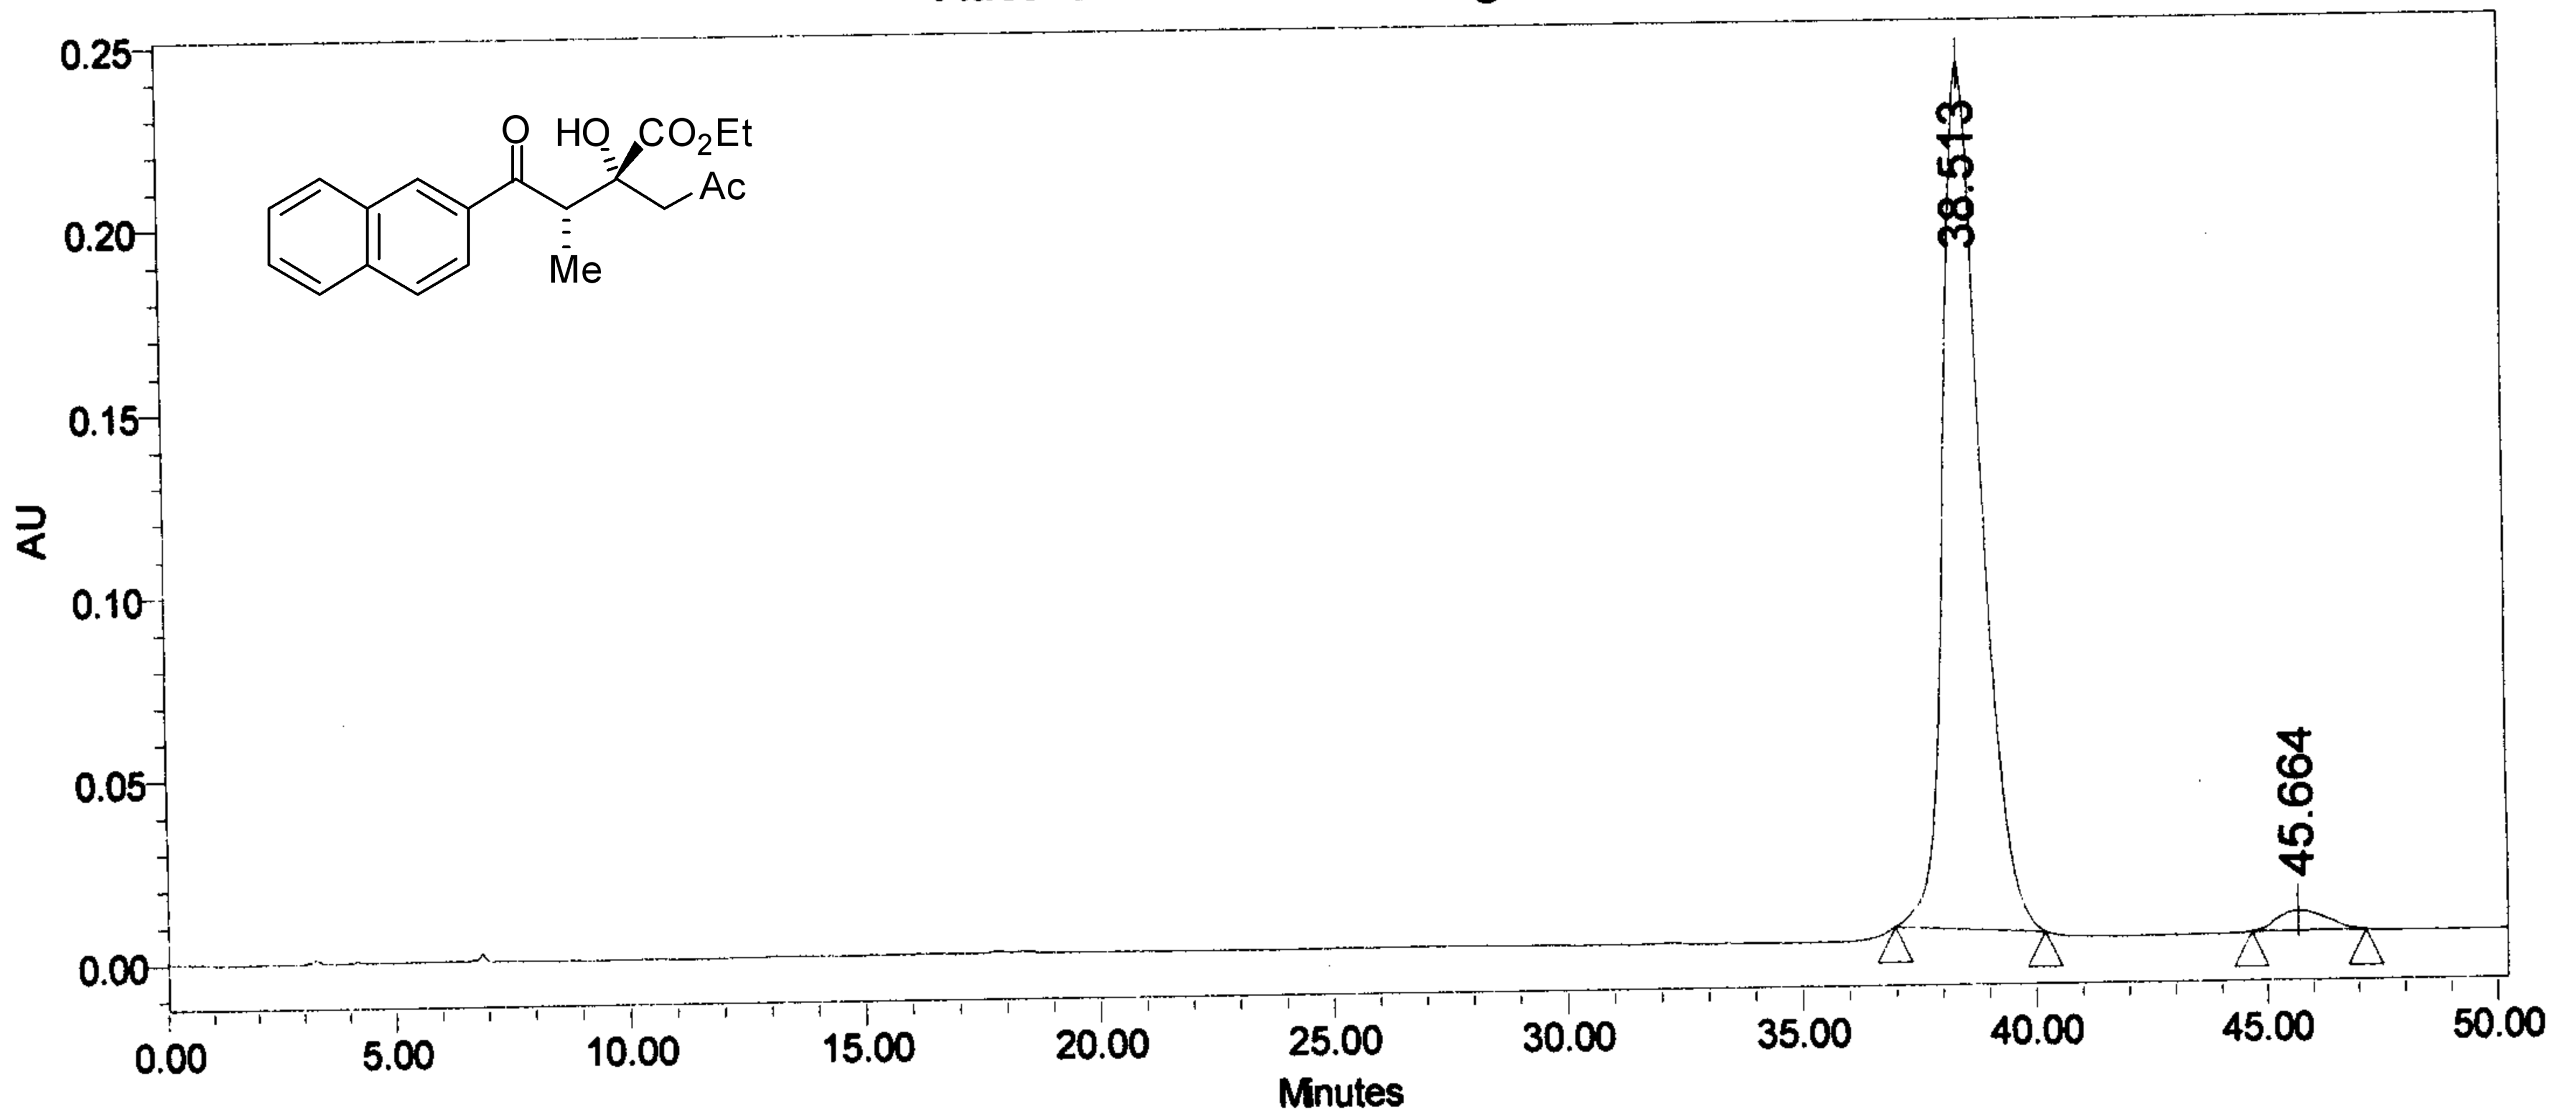

Peak Results

| Name | RT     | Height | Area     | % Area |
|------|--------|--------|----------|--------|
| 1    | 38.513 | 236448 | 13273202 | 97.02  |
| 2    | 45.664 | 5410   | 407449   | 2.98   |

ee 94.04%  
dr > 99:1

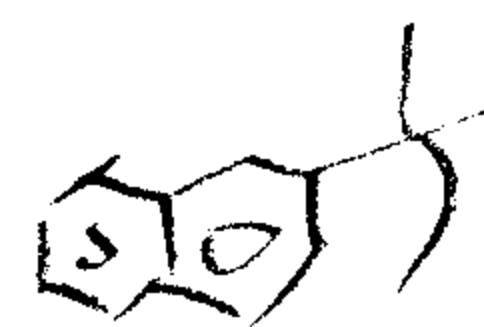

## SAMPLE INFORMATION

Sample Name: yj-1-rac  
Sample Type: Unknown  
Vial: 1  
Injection #: 1  
Injection Volume: 10.00 ul  
Run Time: 80.0 Minutes

Acquired By: System  
Sample Set Name:  
Acq. Method Set: Test  
Processing Method: dzh  
Channel Name: 254.0nm  
Proc. Chnl. Descr.: PDA 254.0 nm

Date Acquired: 2008-4-11 11:12:43 CST  
Date Processed: 2008-4-11 13:08:55 CST

## Auto-Scaled Chromatogram

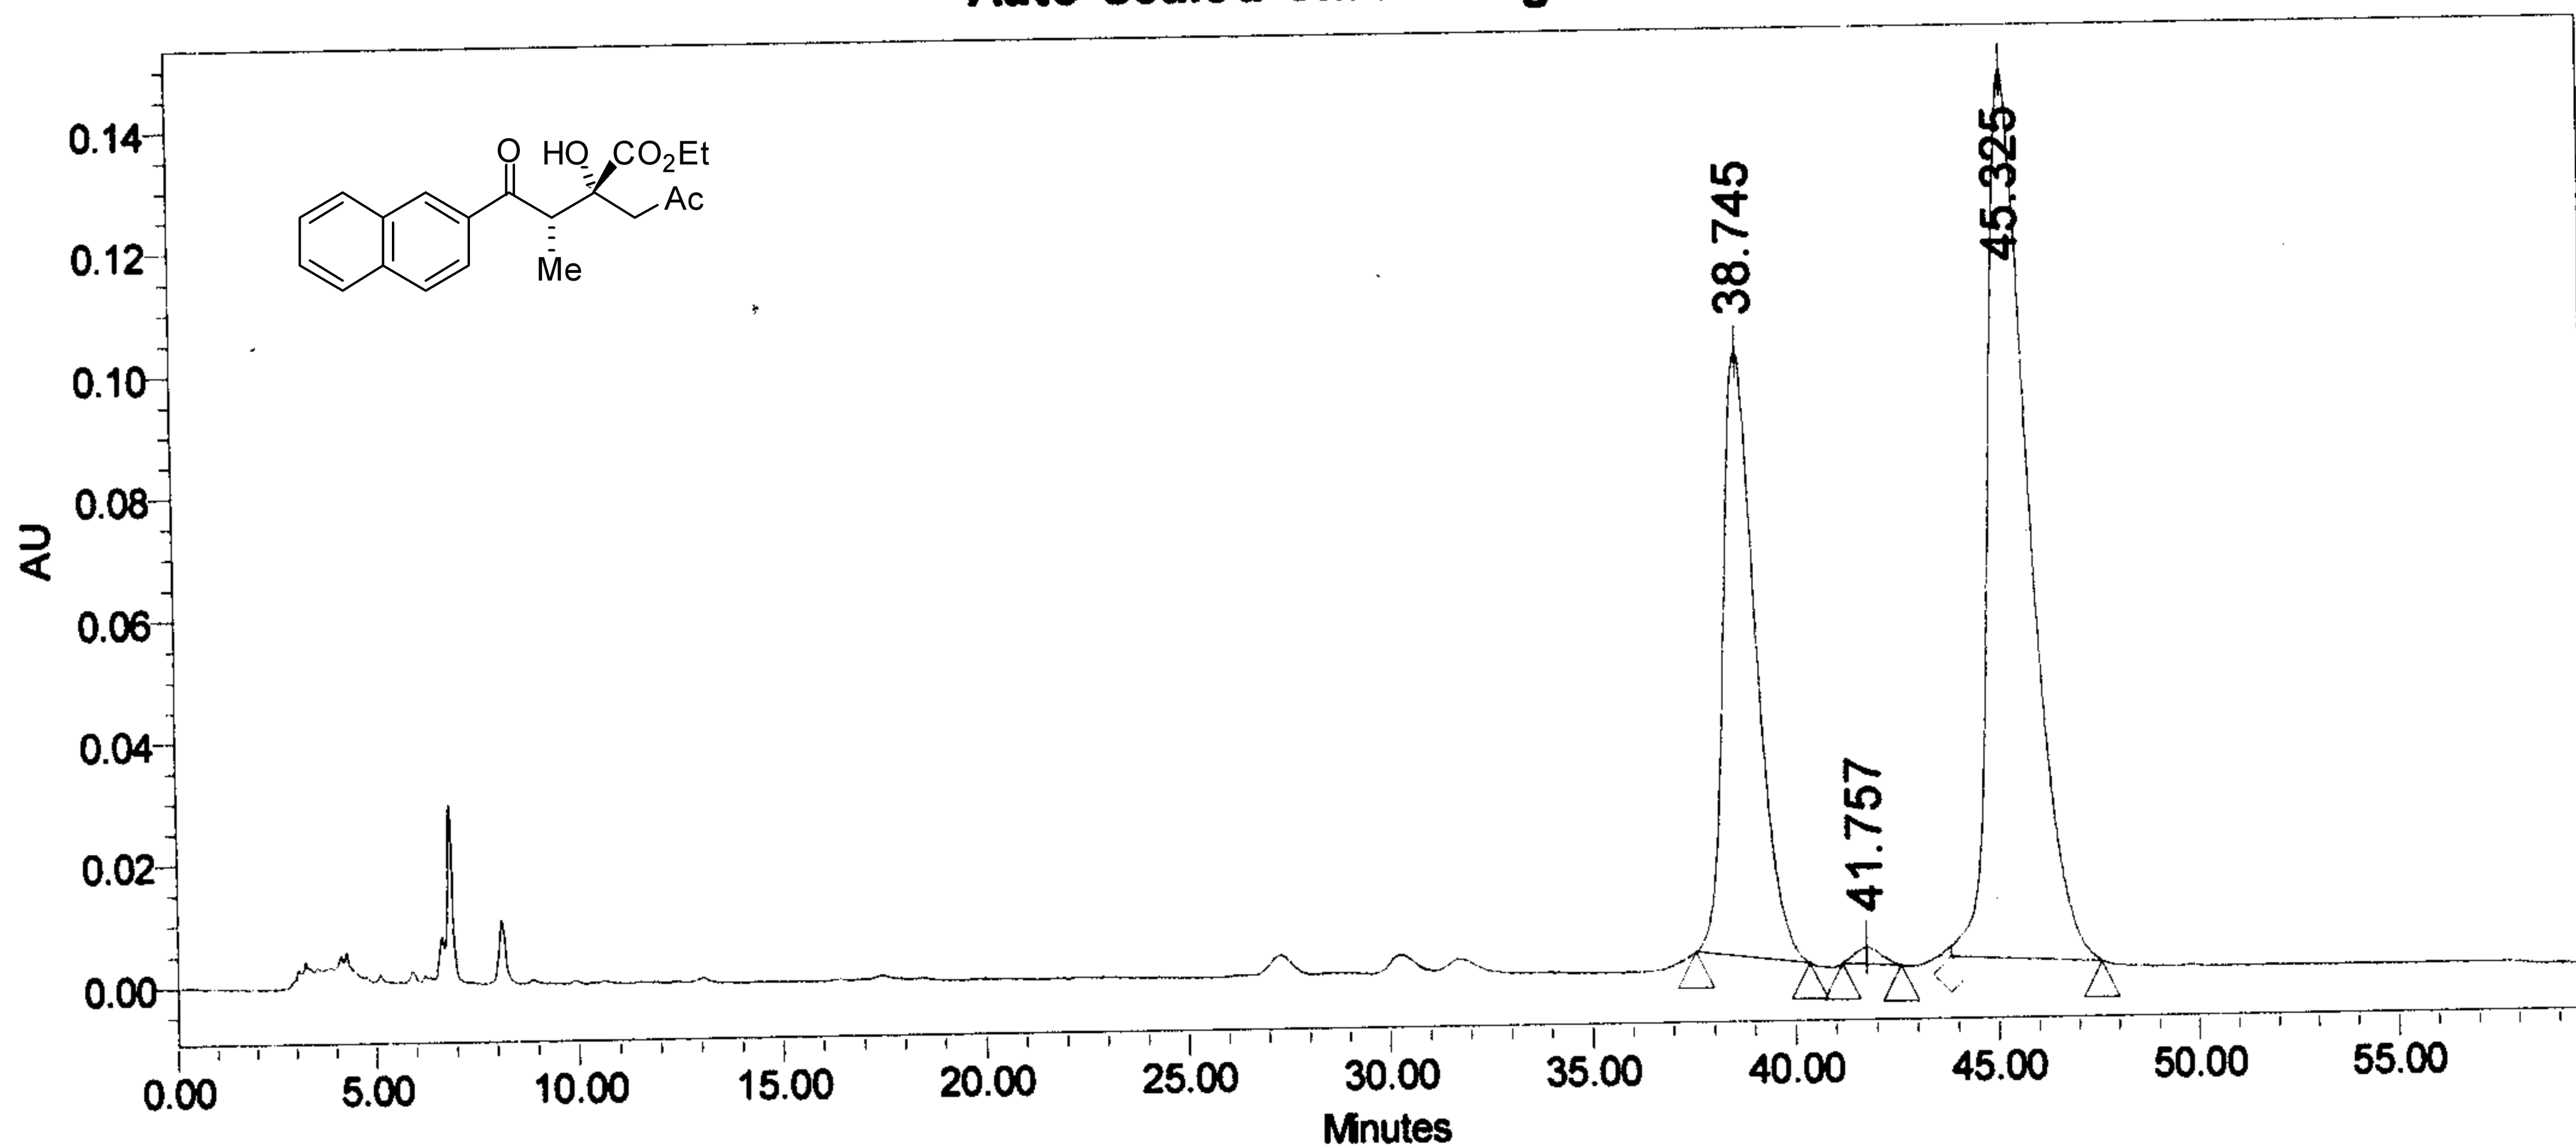

## Peak Results

| Name | RT     | Height | Area     | % Area |
|------|--------|--------|----------|--------|
| 1    | 38.745 | 99022  | 5483800  | 34.89  |
| 2    | 41.757 | 2671   | 118591   | 0.75   |
| 3    | 45.325 | 145640 | 10117072 | 64.36  |



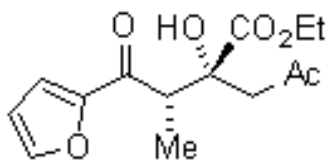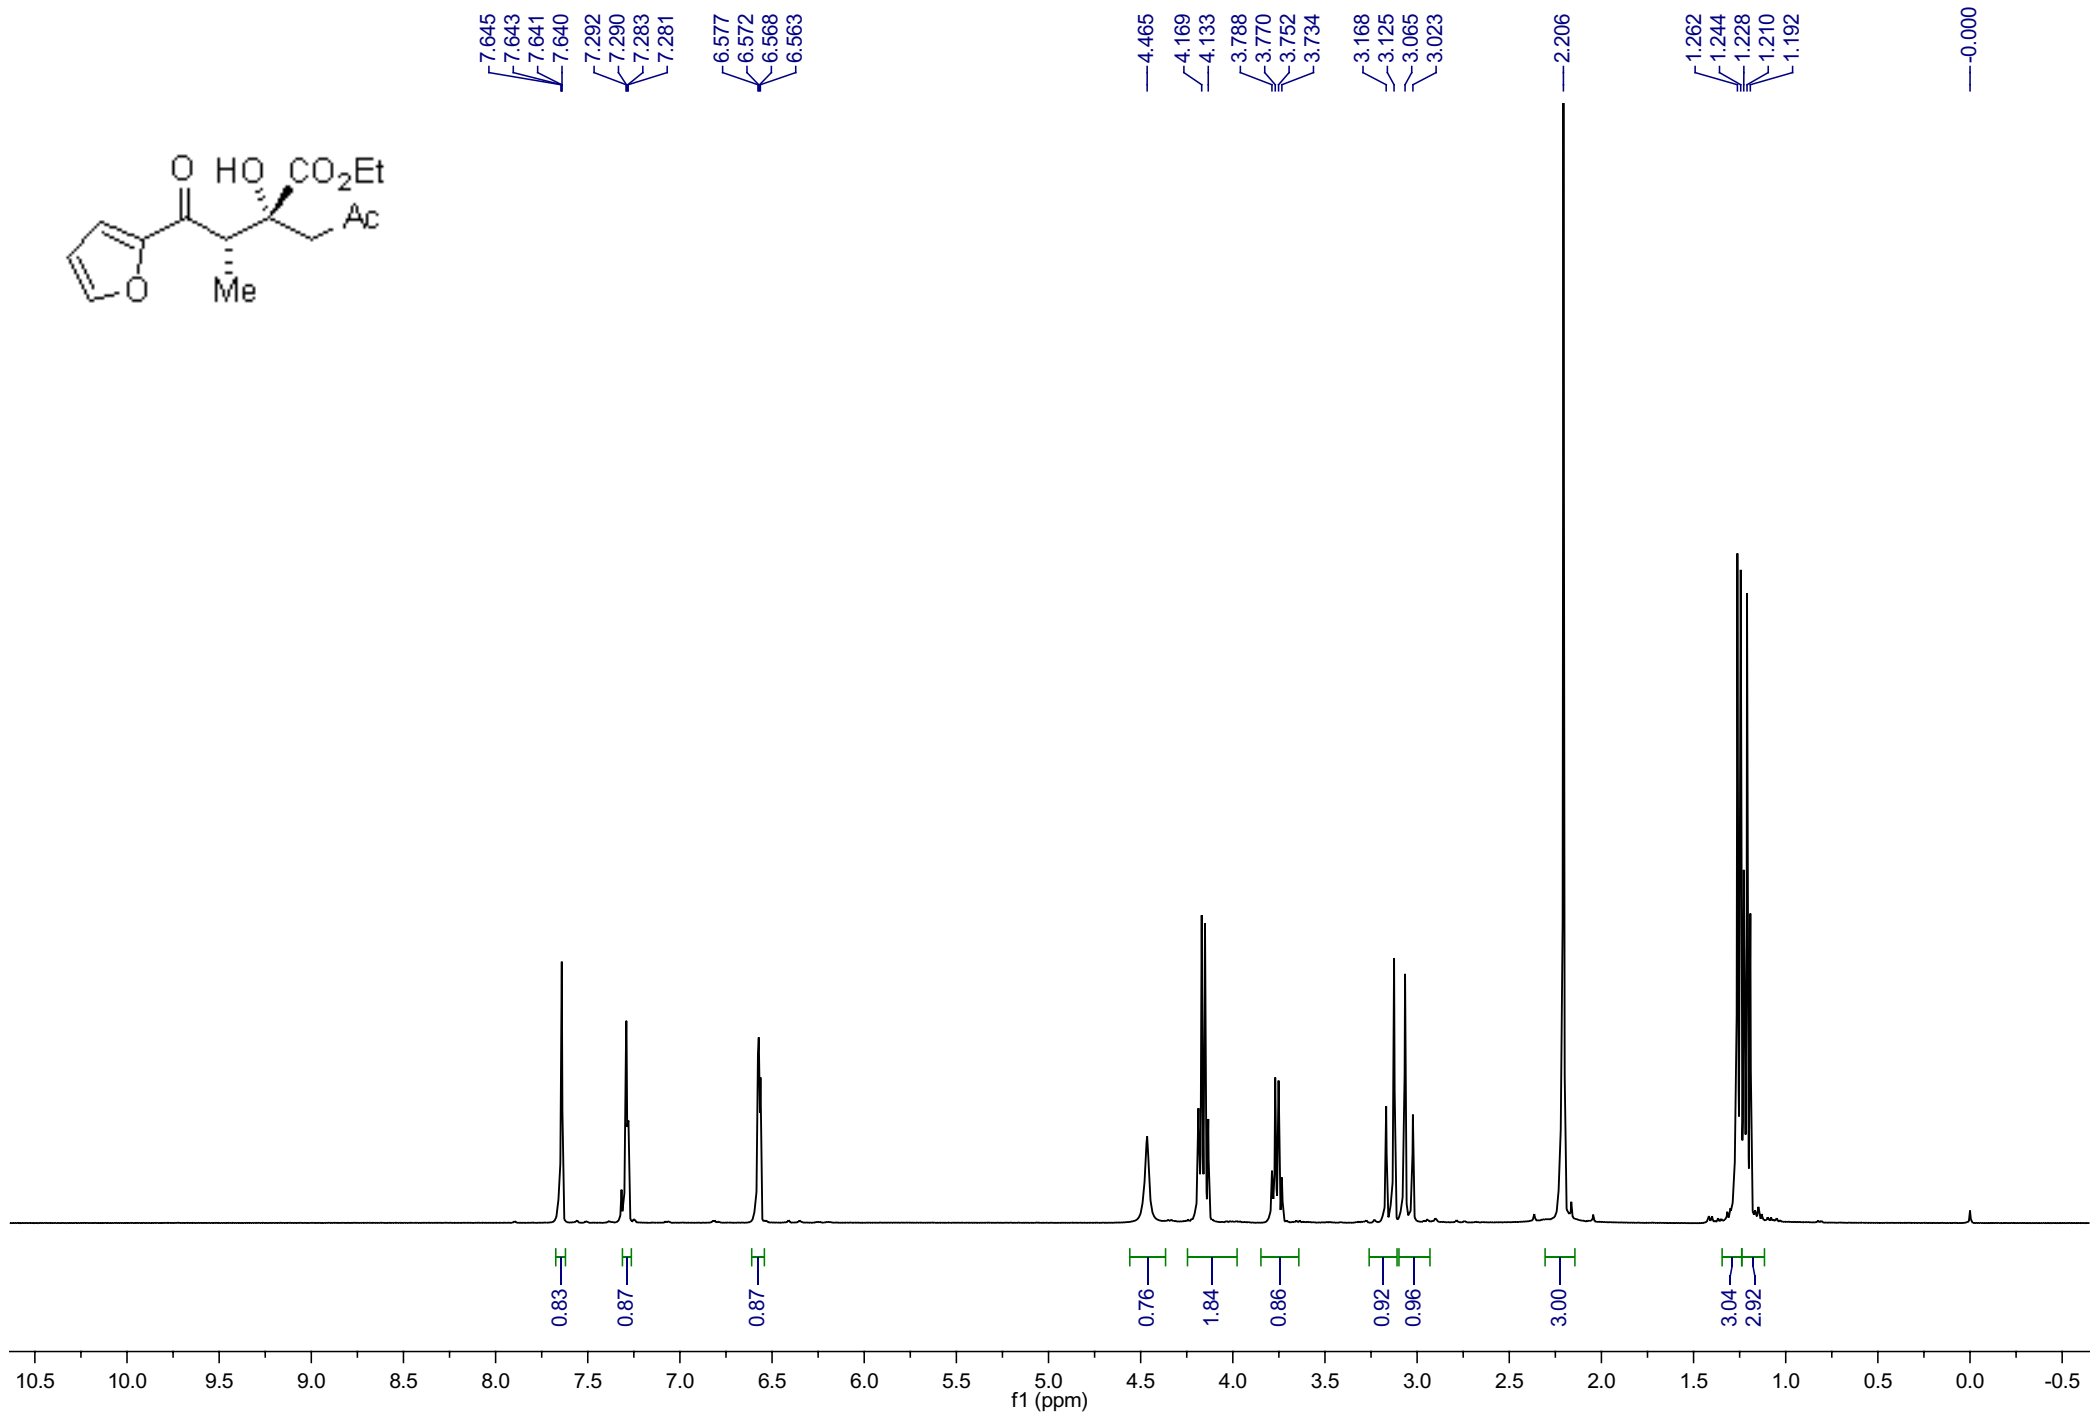

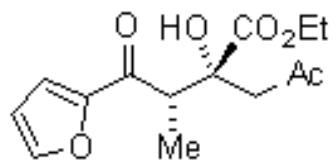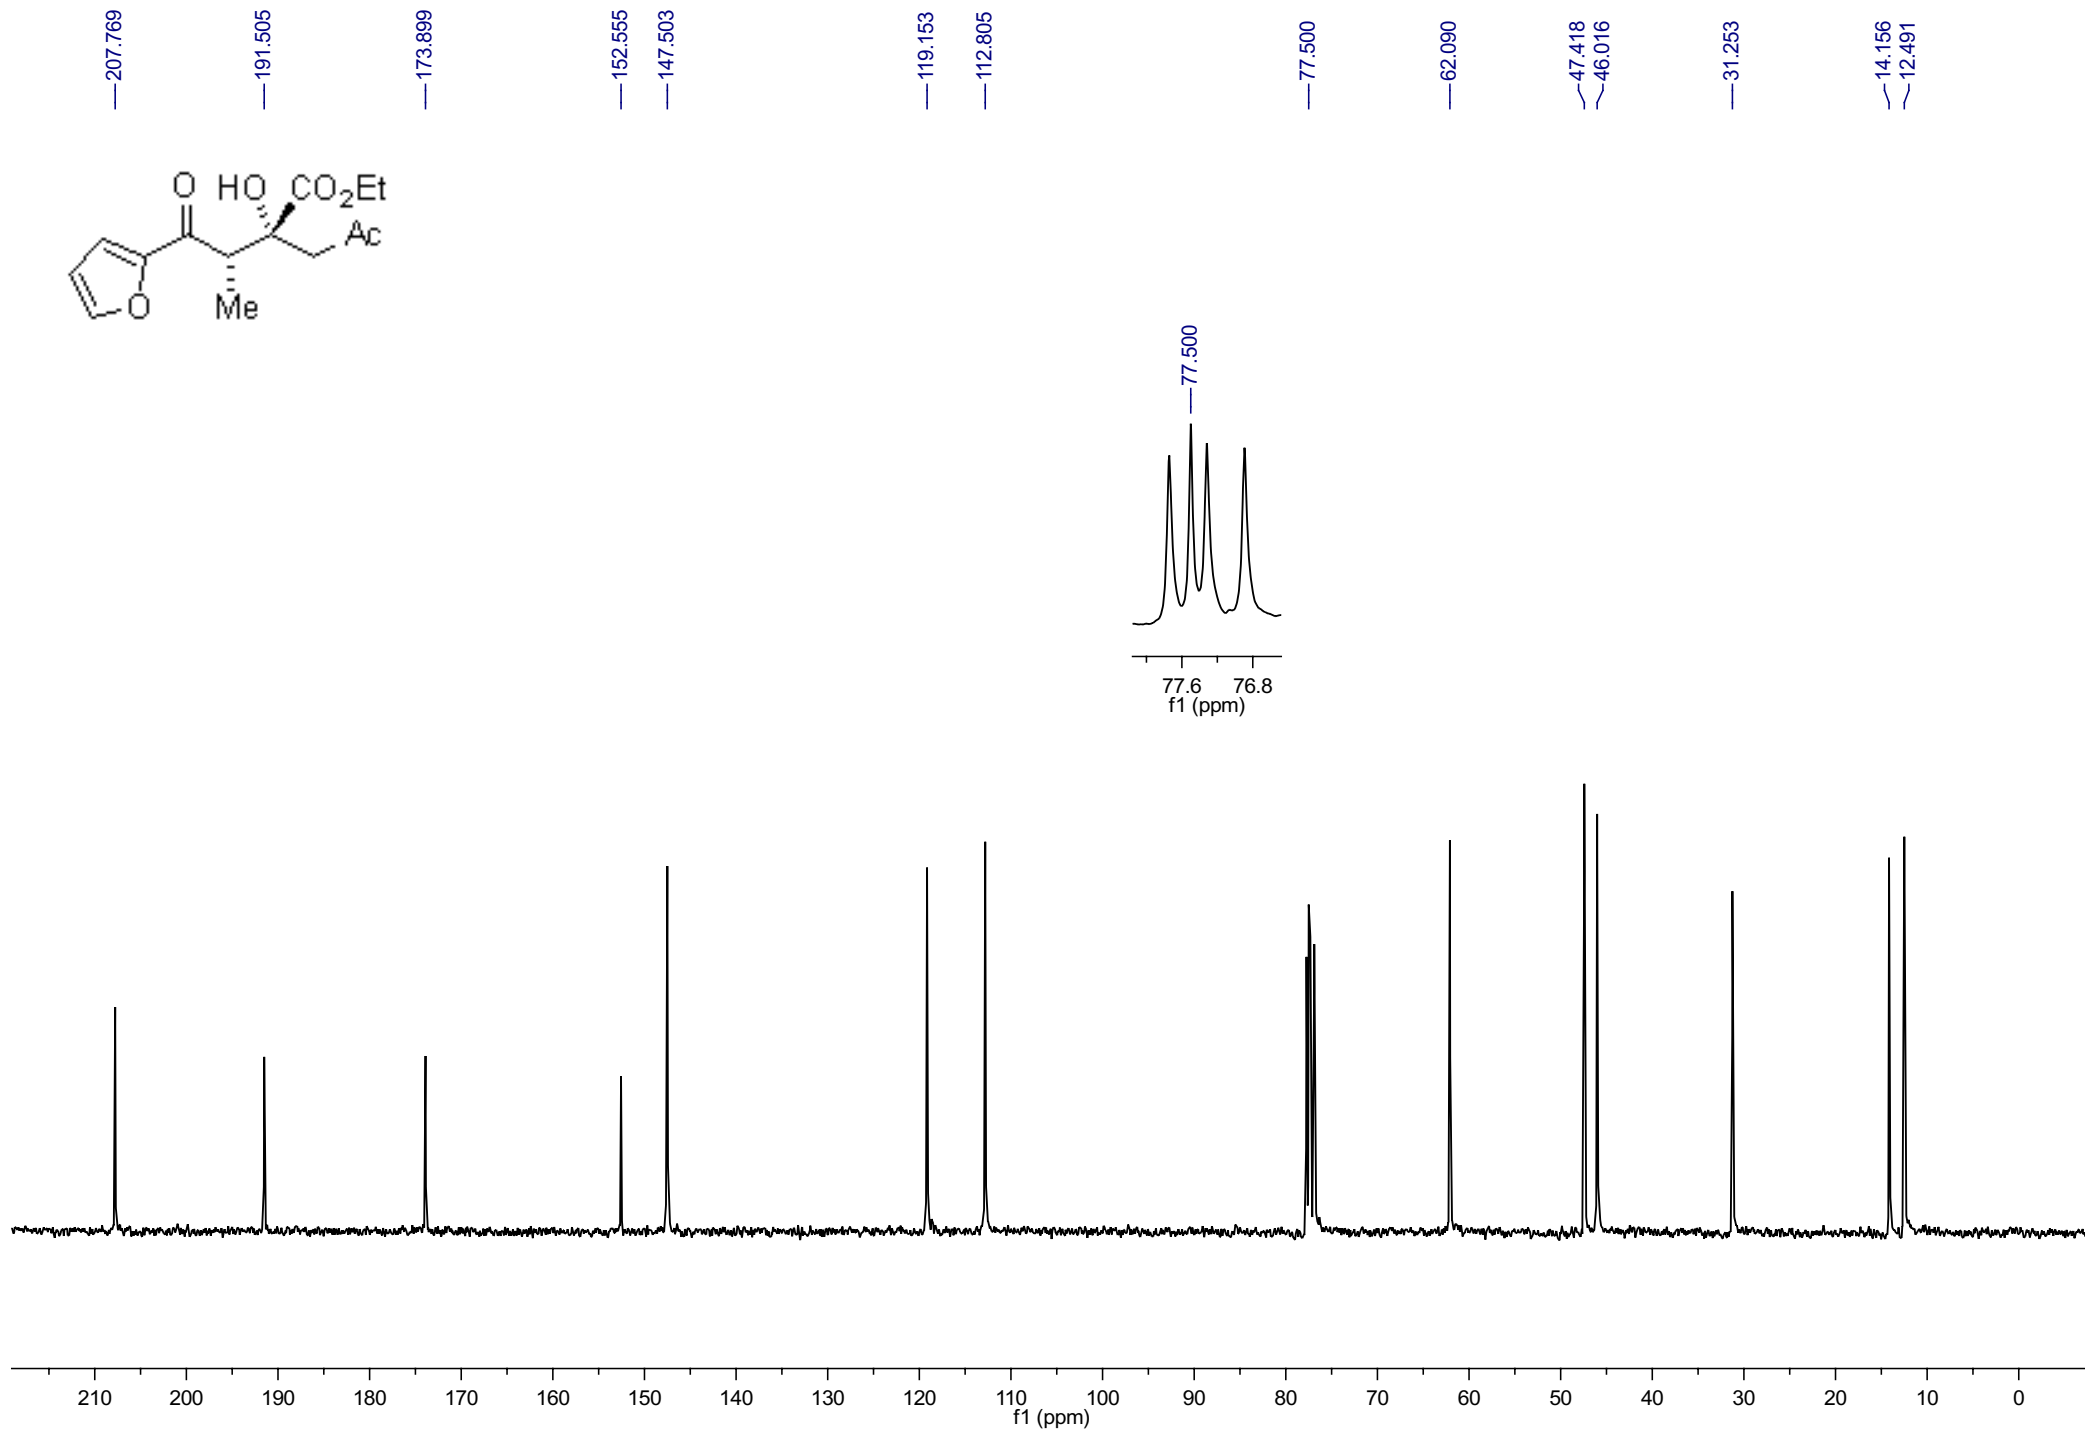

SUDA-TOFMS-EI-080703

yj-4 96 (1.599) Cm (91:97-(125:137+149:165))

TOF MS EI+  
2.86e5

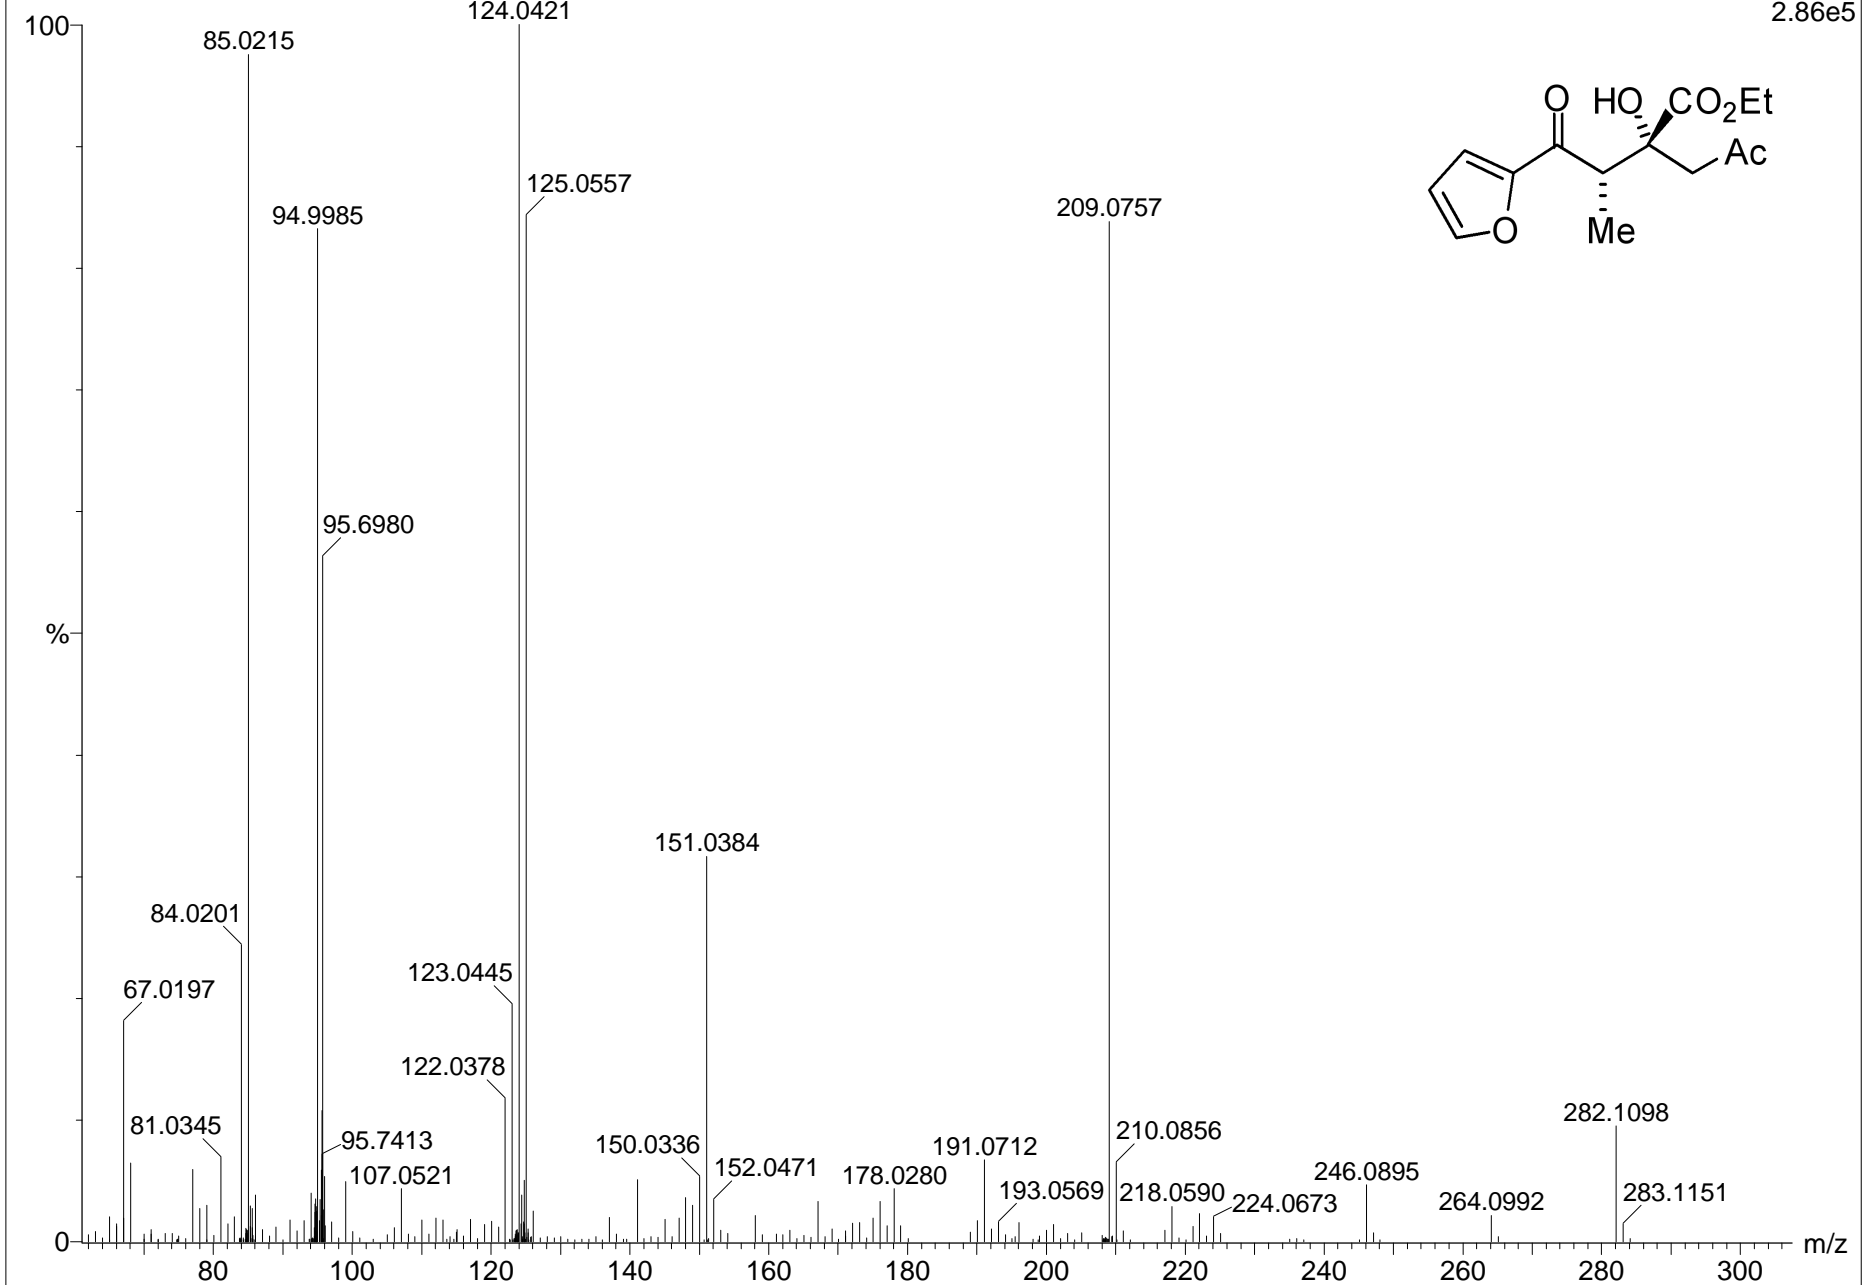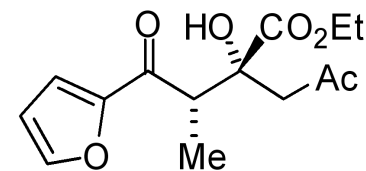

SAMPLE INFORMATION

|                   |                        |                     |              |
|-------------------|------------------------|---------------------|--------------|
| Sample Name:      | yj-1                   | Acquired By:        | System       |
| Sample Type:      | Unknown                | Sample Set Name:    |              |
| Vial:             | 1                      | Acq. Method Set:    | Untitled     |
| Injection #:      | 2                      | Processing Method:  | szx1         |
| Injection Volume: | 20.00 ul               | Channel Name:       | 254.0nm      |
| Run Time:         | 60.0 Minutes           | Proc. Chnl. Descr.: | PDA 254.0 nm |
| Date Acquired:    | 2008-5-16 16:09:41 CST |                     |              |
| Date Processed:   | 2008-5-16 16:52:54 CST |                     |              |

Auto-Scaled Chromatogram

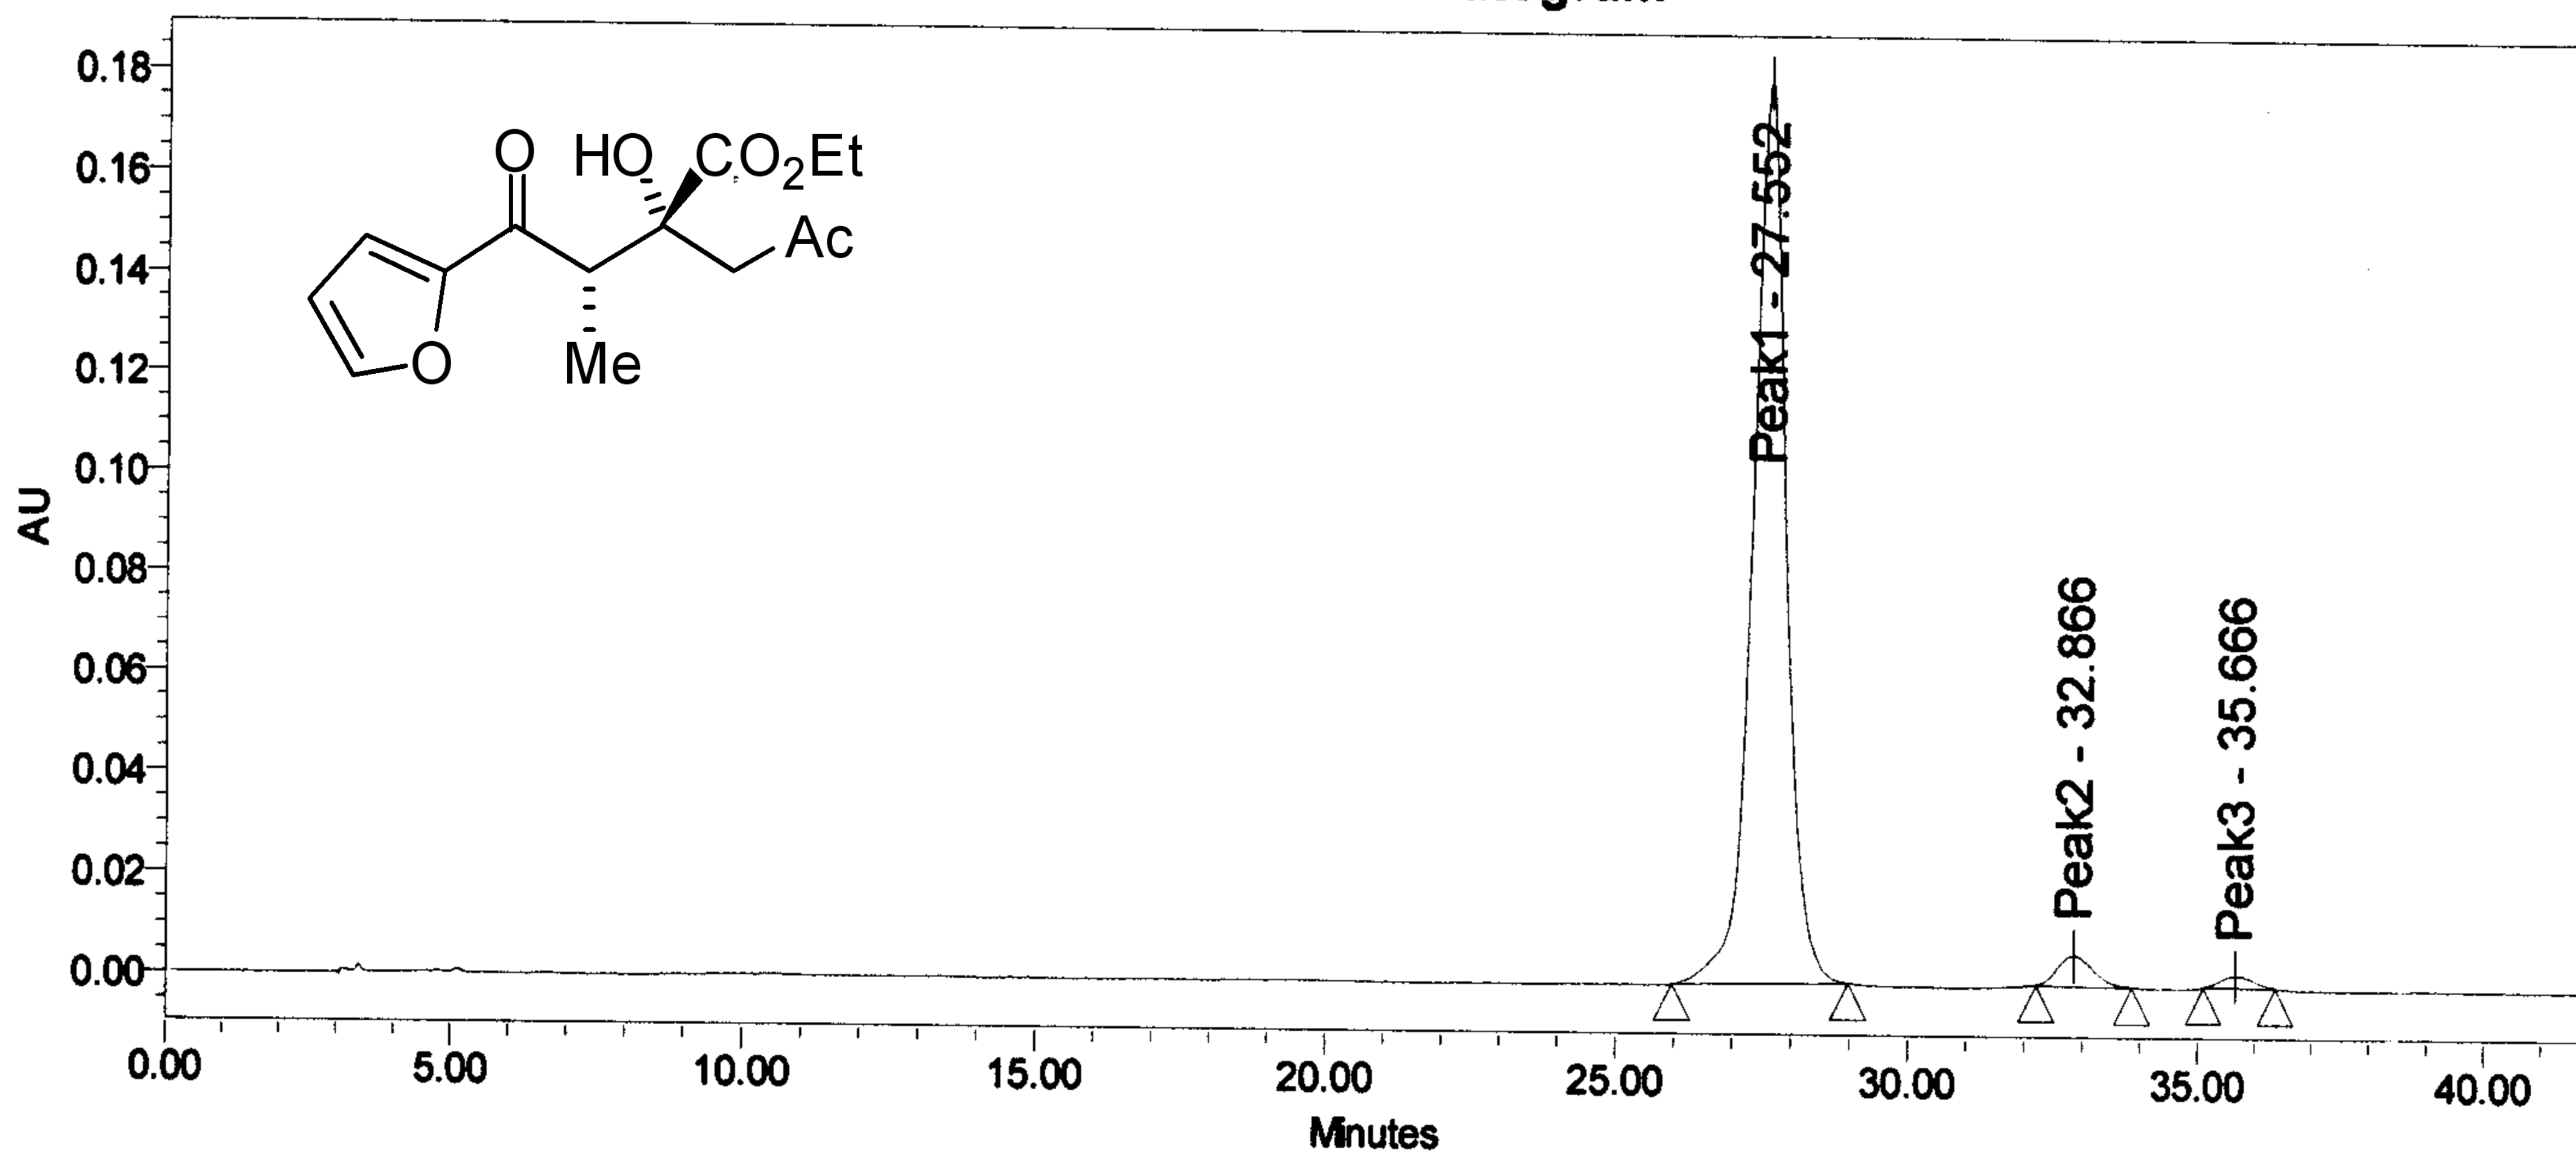

Peak Results

|   | Name  | RT     | Area    | Height | Amount | Units | % Area |
|---|-------|--------|---------|--------|--------|-------|--------|
| 1 | Peak1 | 27.552 | 7099860 | 179844 |        |       | 95.20  |
| 2 | Peak2 | 32.866 | 261213  | 6098   |        |       | 3.50   |
| 3 | Peak3 | 35.666 | 96772   | 2355   |        |       | 1.30   |

dr 97.3  
 ee. 97.7

SAMPLE INFORMATION

|                   |                        |                     |              |
|-------------------|------------------------|---------------------|--------------|
| Sample Name:      | yj-1-rac               | Acquired By:        | System       |
| Sample Type:      | Unknown                | Sample Set Name:    |              |
| Vial:             | 1                      | Acq. Method Set:    | Untitled     |
| Injection #:      | 1                      | Processing Method:  | szx1         |
| Injection Volume: | 20.00 ul               | Channel Name:       | 254.0nm      |
| Run Time:         | 60.0 Minutes           | Proc. Chnl. Descr.: | PDA 254.0 nm |
| Date Acquired:    | 2008-5-16 15:26:46 CST |                     |              |
| Date Processed:   | 2008-5-16 16:10:19 CST |                     |              |

Auto-Scaled Chromatogram

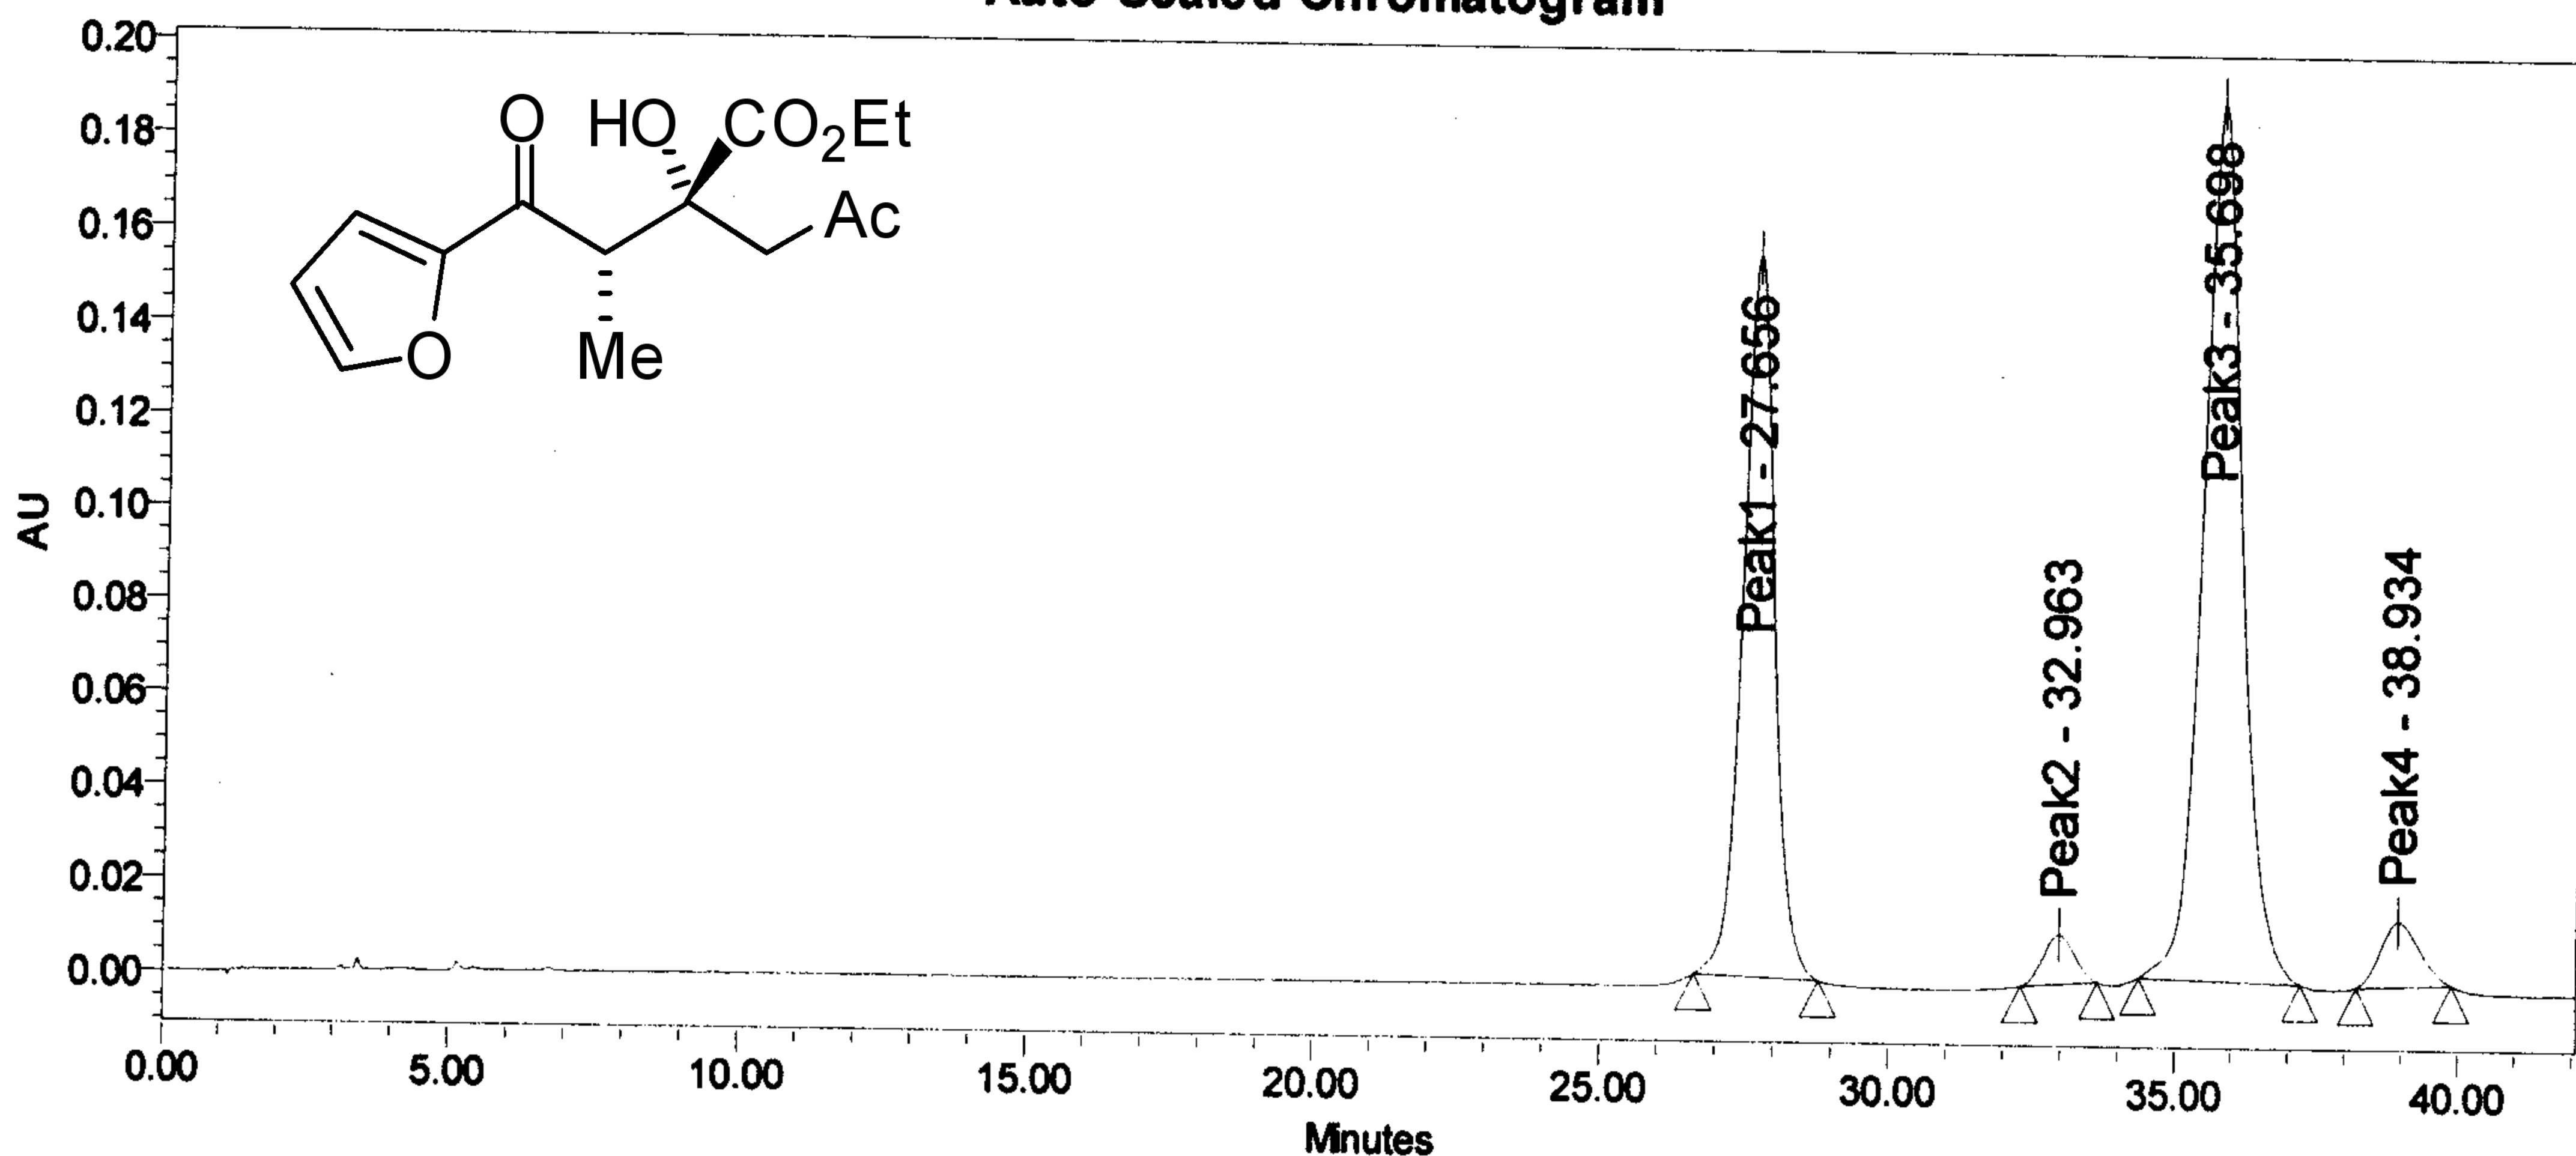

Peak Results

|   | Name  | RT     | Area    | Height | Amount | Units | % Area |
|---|-------|--------|---------|--------|--------|-------|--------|
| 1 | Peak1 | 27.656 | 5811050 | 154775 |        |       | 36.51  |
| 2 | Peak2 | 32.963 | 406577  | 10625  |        |       | 2.55   |
| 3 | Peak3 | 35.698 | 9032678 | 188376 |        |       | 56.75  |
| 4 | Peak4 | 38.934 | 666882  | 13847  |        |       | 4.19   |

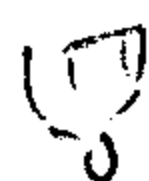

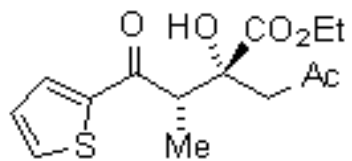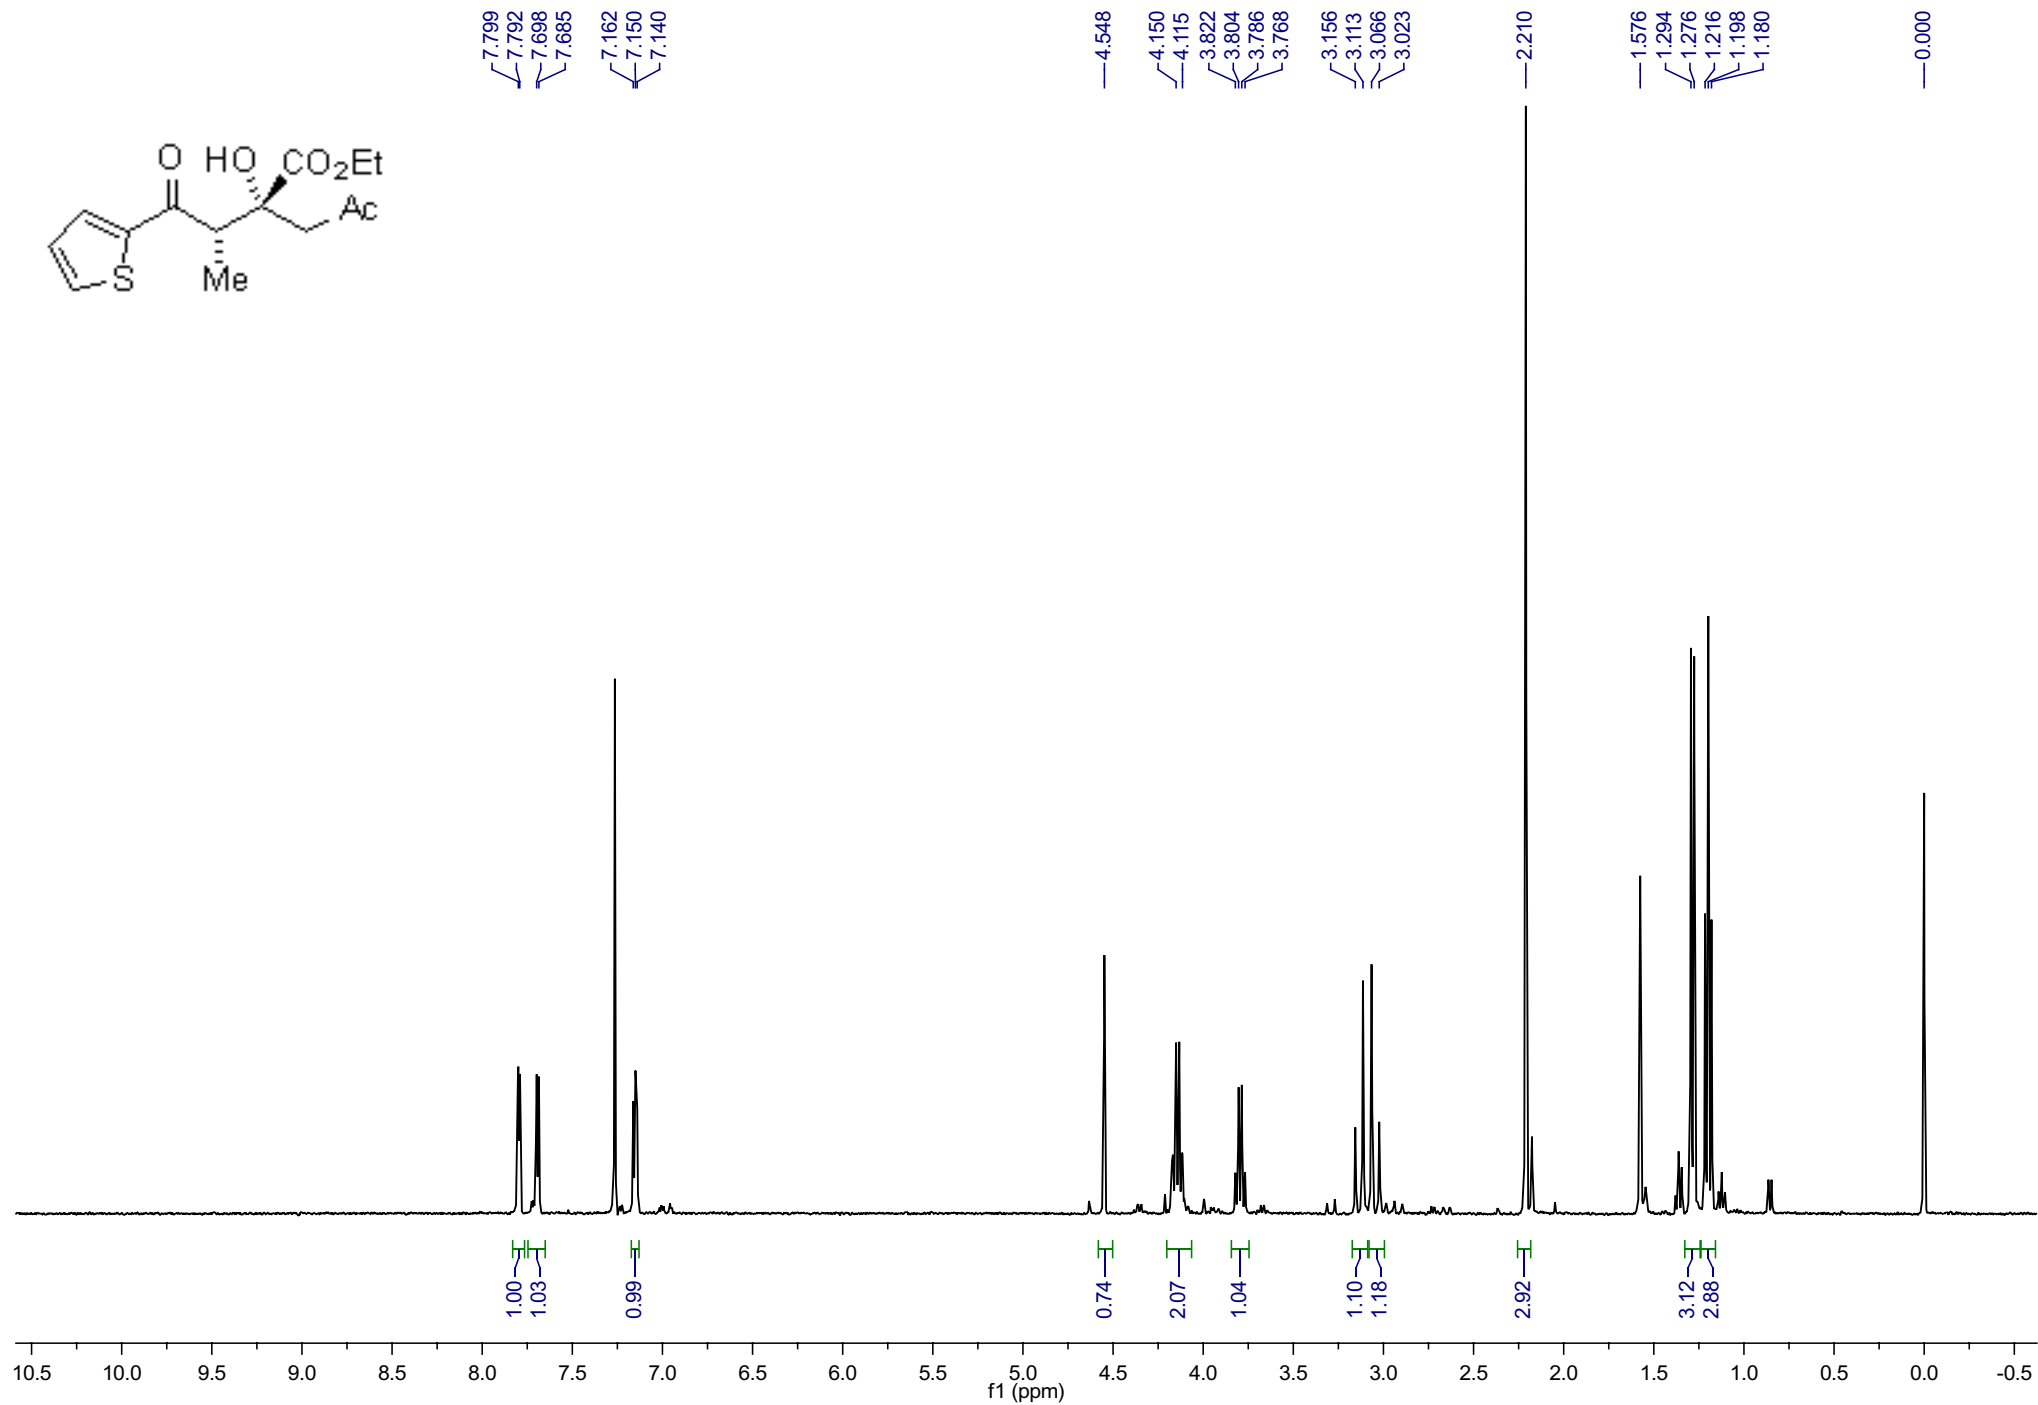

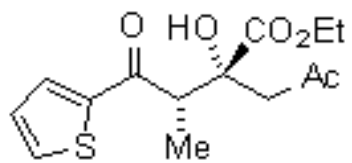

— 207.693

— 196.177

— 173.989

— 144.386

— 135.395

— 133.694

— 128.697

— 77.609

— 62.172

— 47.690  
— 47.121

— 31.375

— 14.250  
— 13.114

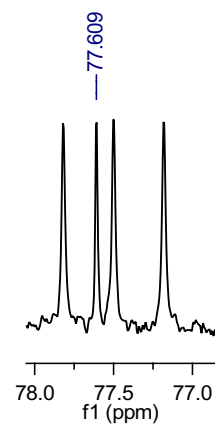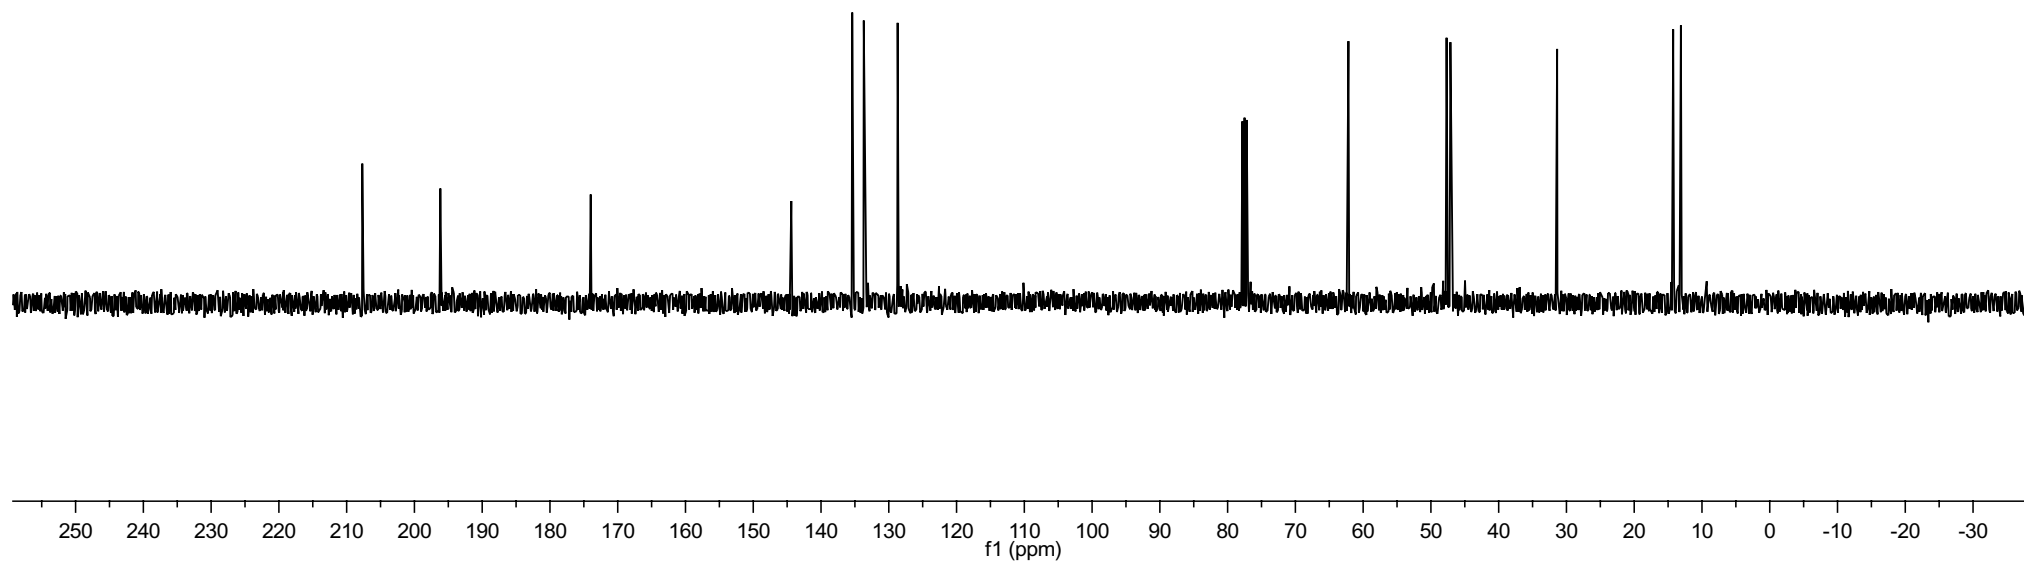

SUDA-TOFMS-EI-080704

yj-5 146 (2.434) Cm (134:146-(229:236+243:249))

TOF MS EI+  
5.95e5

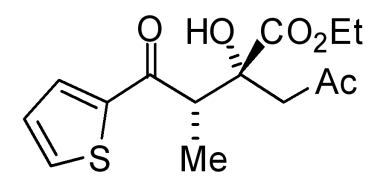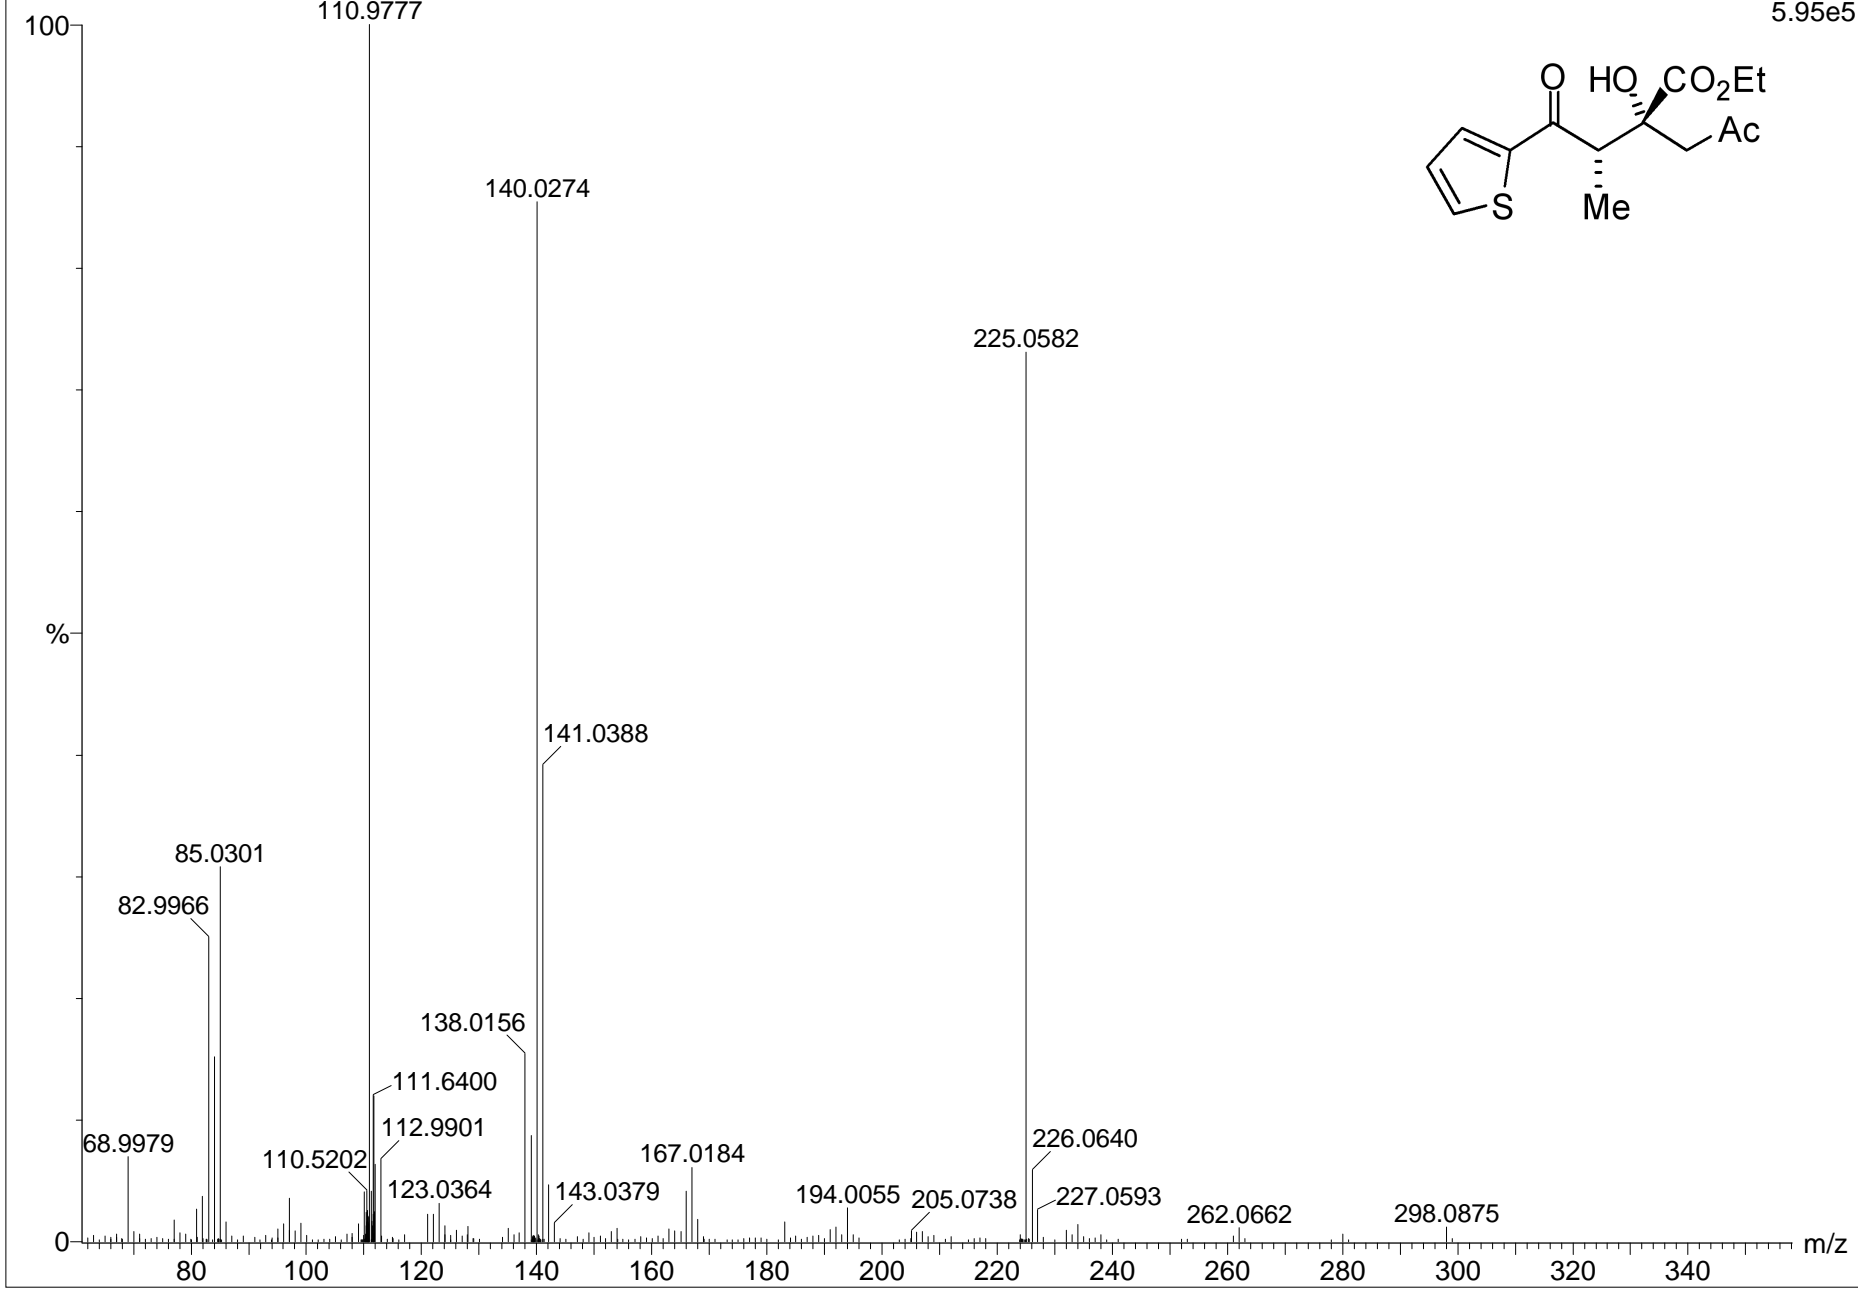



**SAMPLE INFORMATION**

|                   |                        |                     |              |
|-------------------|------------------------|---------------------|--------------|
| Sample Name:      | yj-2                   | Acquired By:        | System       |
| Sample Type:      | Unknown                | Sample Set Name:    |              |
| Vial:             | 1                      | Acq. Method Set:    | Untitled     |
| Injection #:      | 13                     | Processing Method:  | szx1         |
| Injection Volume: | 20.00 ul               | Channel Name:       | 254.0nm      |
| Run Time:         | 60.0 Minutes           | Proc. Chnl. Descr.: | PDA 254.0 nm |
| Date Acquired:    | 2008-5-16 13:54:25 CST |                     |              |
| Date Processed:   | 2008-5-16 14:19:23 CST |                     |              |

**Auto-Scaled Chromatogram**

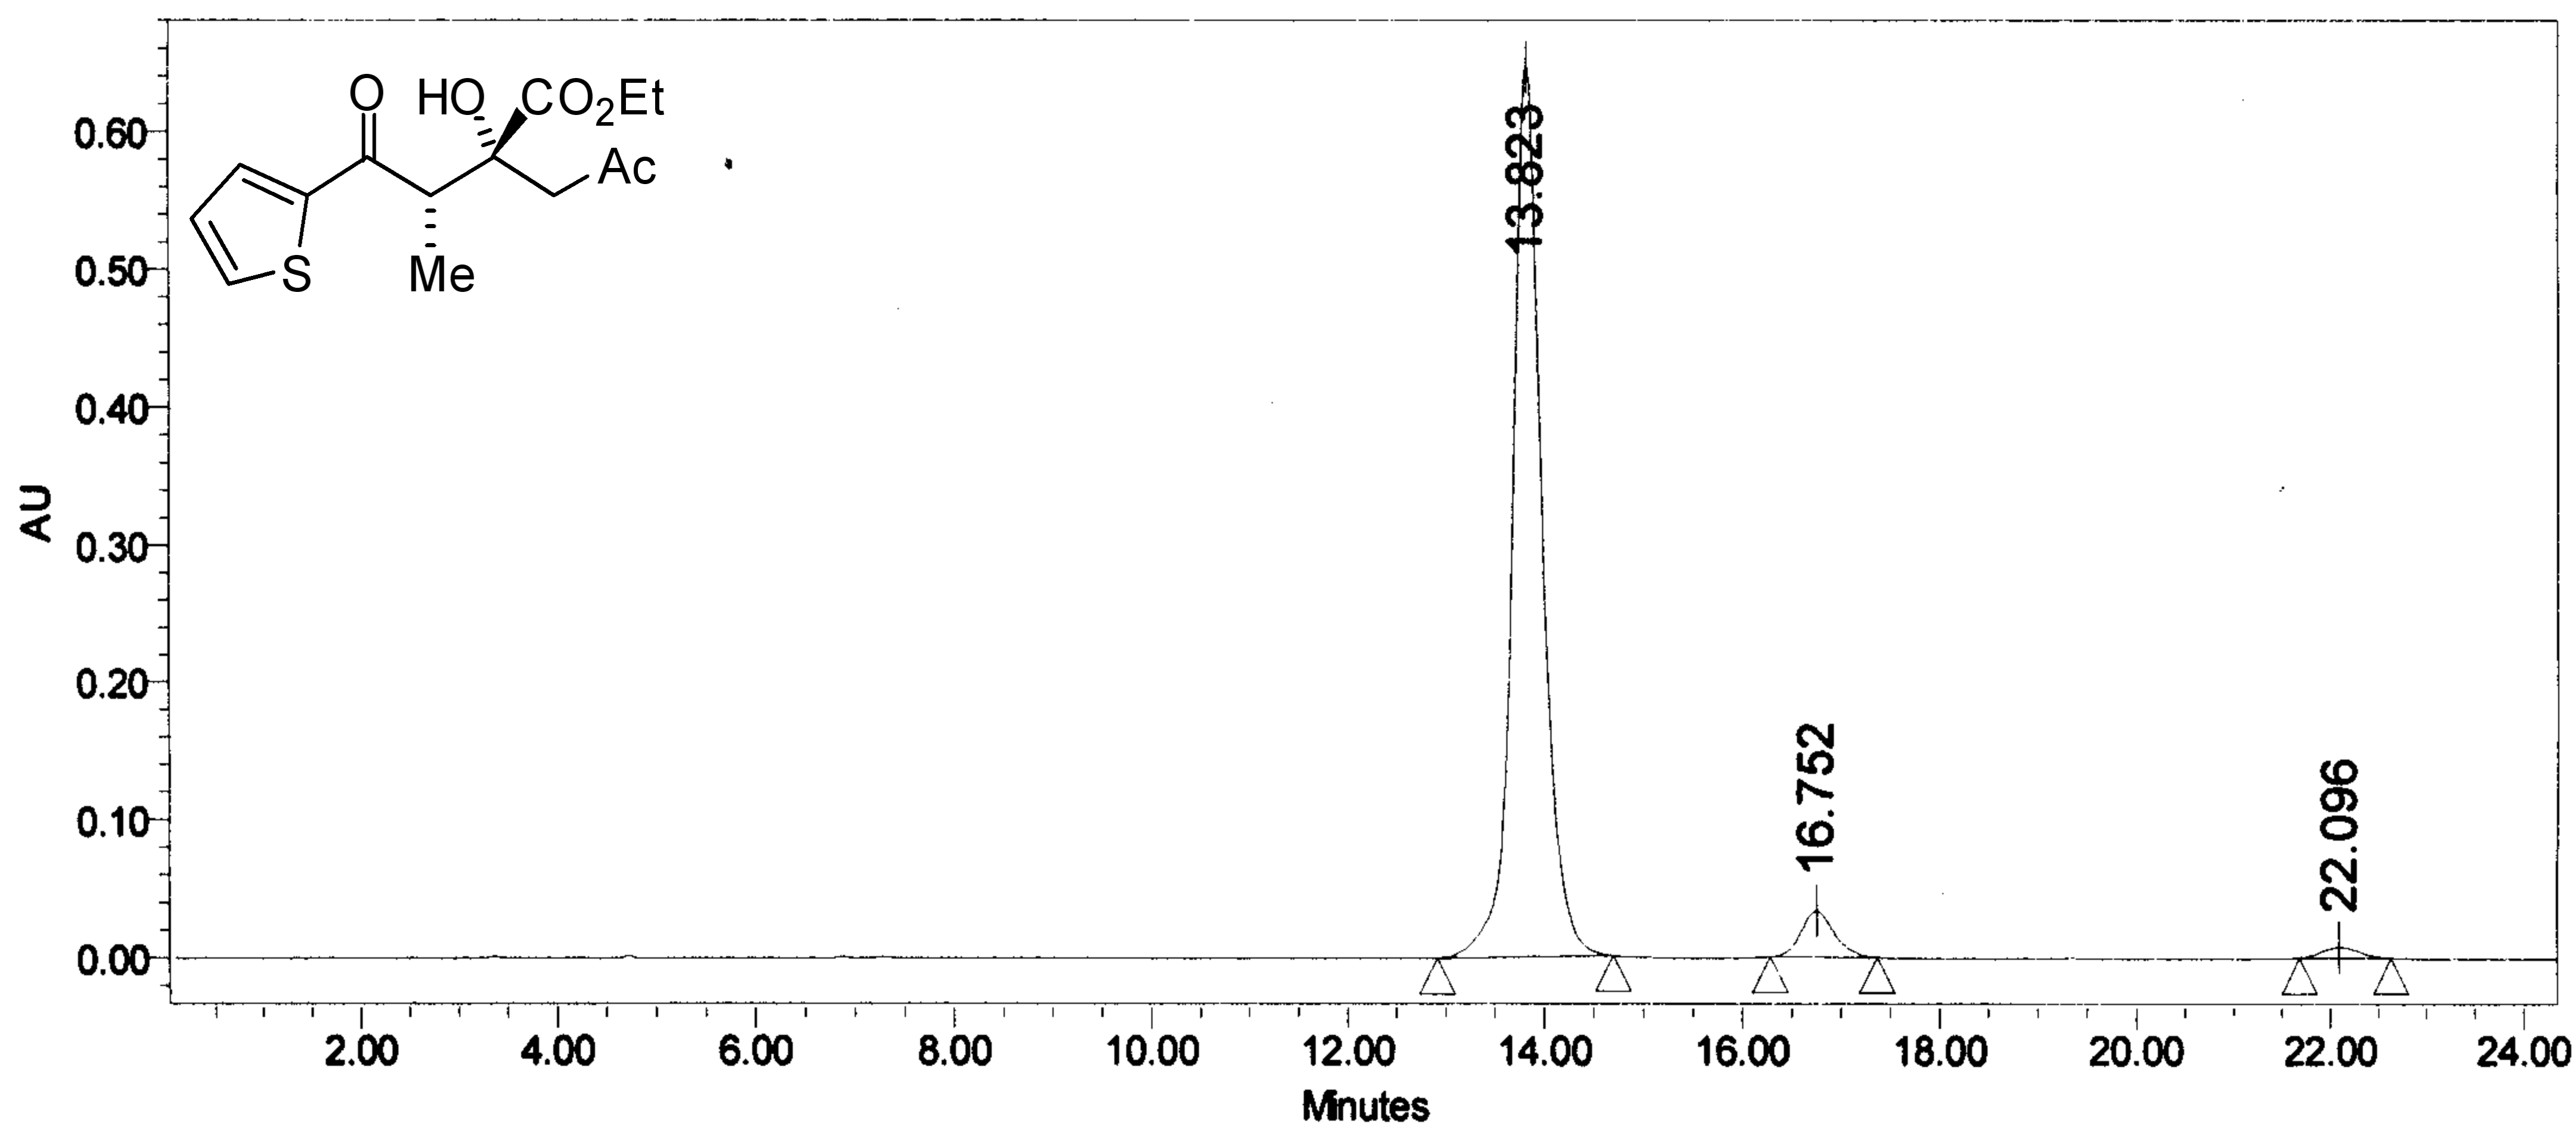

**Peak Results**

| Name | RT     | Area     | Height | Amount | Units | % Area |
|------|--------|----------|--------|--------|-------|--------|
| 1    | 13.823 | 13411458 | 647279 |        |       | 93.11  |
| 2    | 16.752 | 780145   | 33349  |        |       | 5.42   |
| 3    | 22.096 | 211544   | 7824   |        |       | 1.47   |

*dr 95:5*

*ee = 96.9 ~ 97%*

*5*

## SAMPLE INFORMATION

|                   |                        |                     |              |
|-------------------|------------------------|---------------------|--------------|
| Sample Name:      | yj-2-rac               | Acquired By:        | System       |
| Sample Type:      | Unknown                | Sample Set Name:    |              |
| Vial:             | 1                      | Acq. Method Set:    | Untitled     |
| Injection #:      | 12                     | Processing Method:  | szx1         |
| Injection Volume: | 20.00 ul               | Channel Name:       | 254.0nm      |
| Run Time:         | 60.0 Minutes           | Proc. Chnl. Descr.: | PDA 254.0 nm |
| Date Acquired:    | 2008-5-16 13:21:10 CST |                     |              |
| Date Processed:   | 2008-5-16 13:55:05 CST |                     |              |

## Auto-Scaled Chromatogram

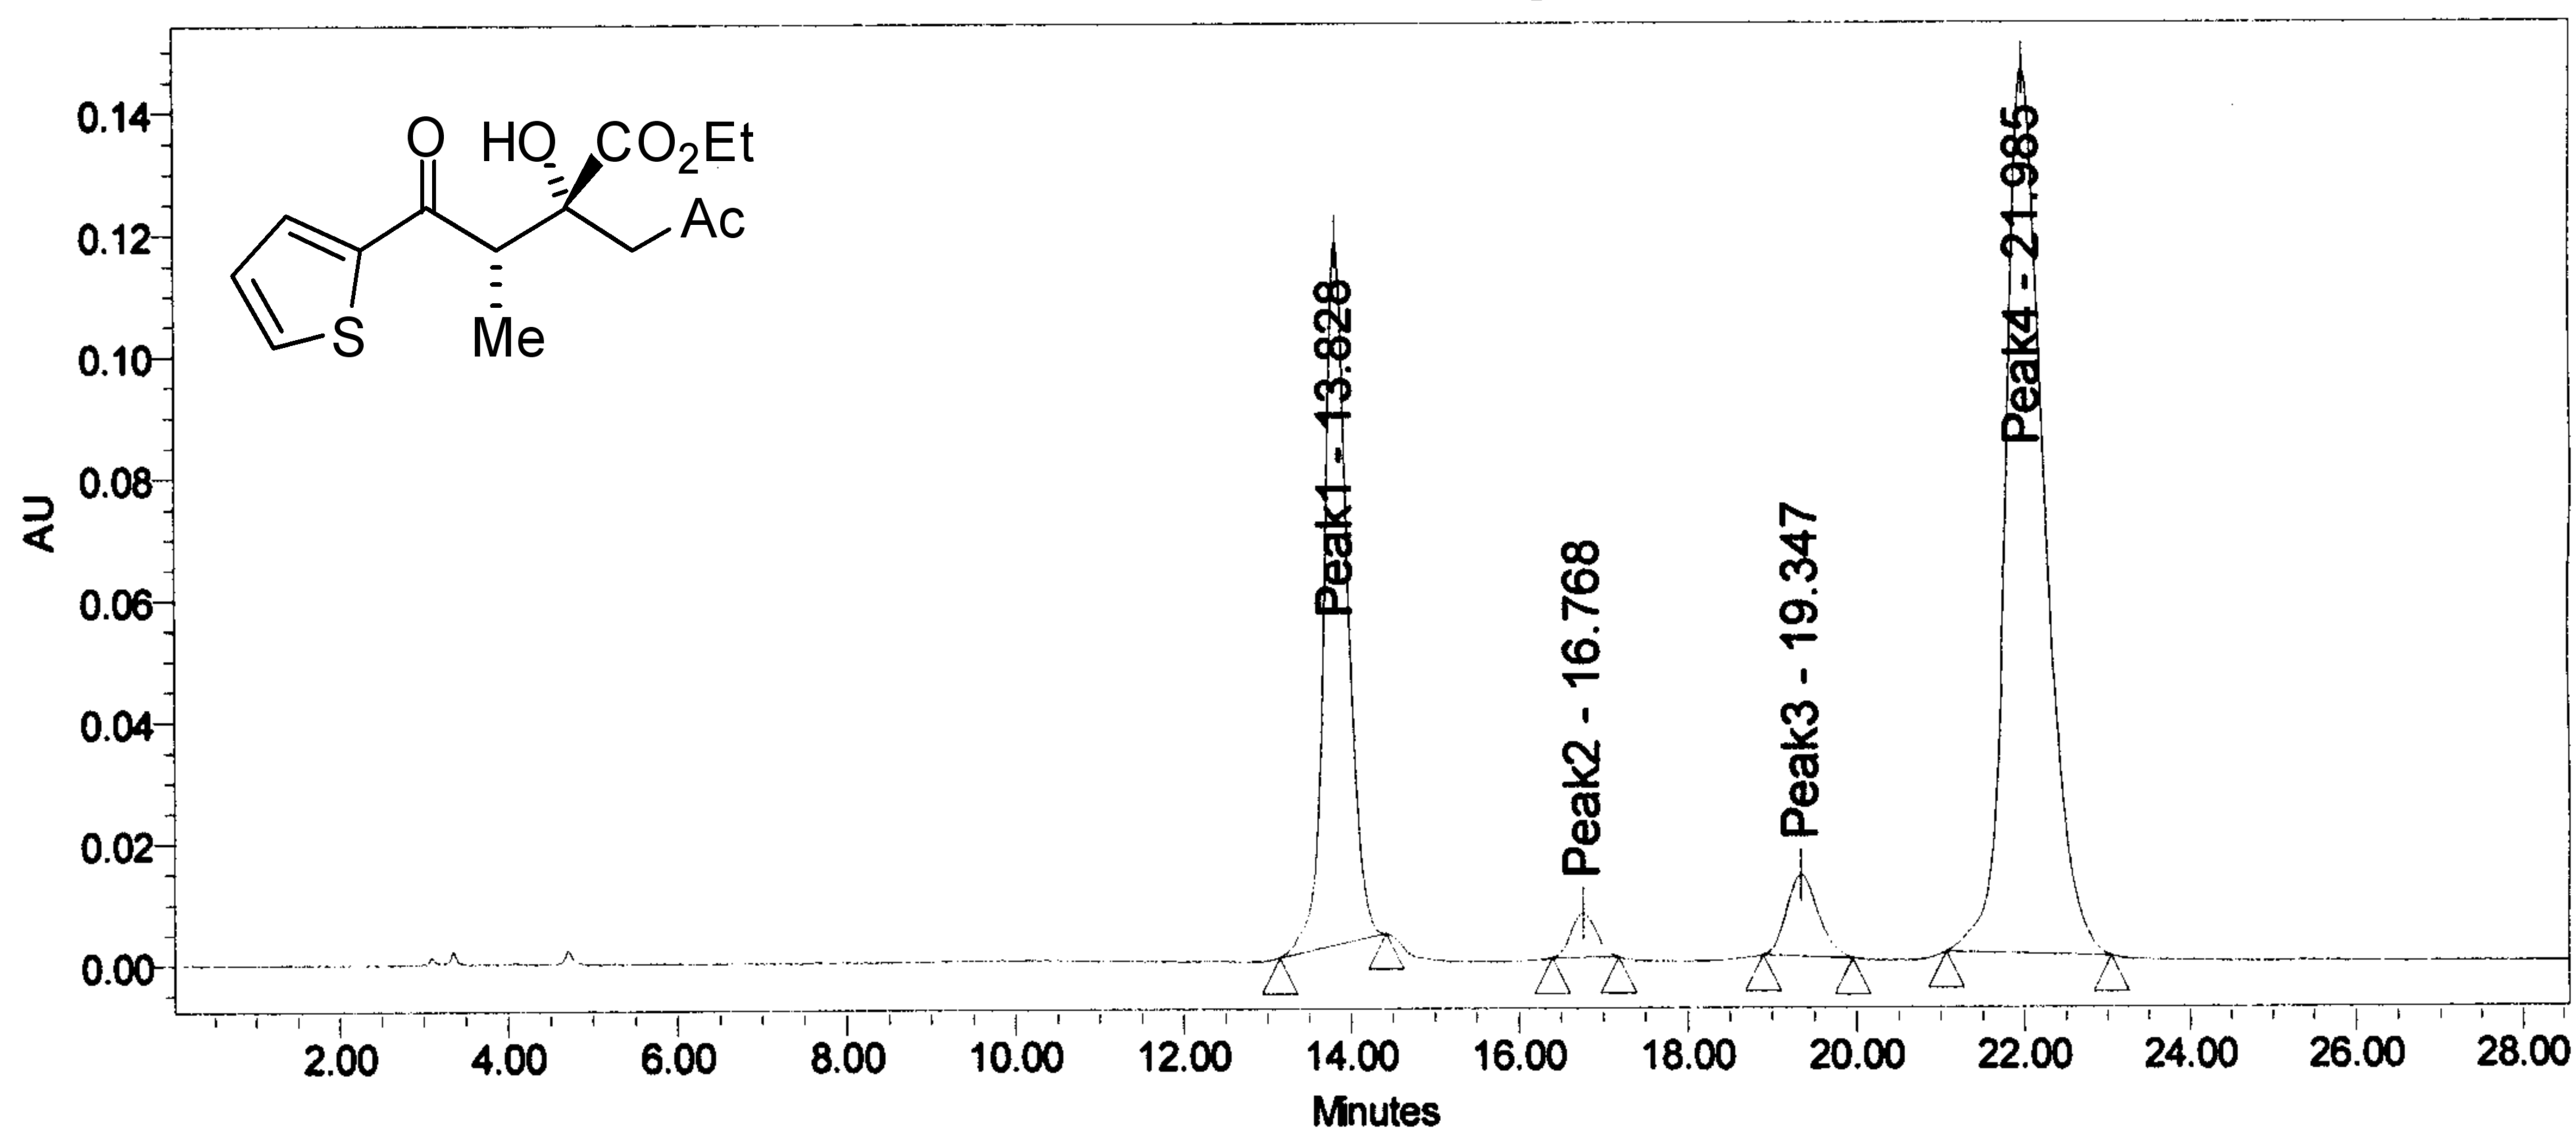

## Peak Results

|   | Name  | RT     | Area    | Height | Amount | Units | % Area |
|---|-------|--------|---------|--------|--------|-------|--------|
| 1 | Peak1 | 13.828 | 2235590 | 115860 |        |       | 30.03  |
| 2 | Peak2 | 16.768 | 153348  | 7308   |        |       | 2.06   |
| 3 | Peak3 | 19.347 | 344878  | 13307  |        |       | 4.63   |
| 4 | Peak4 | 21.985 | 4711733 | 145502 |        |       | 63.28  |
